# Supplementary material for: New Janus Tricyclic Laddersiloxanes: Synthesis, Characterization and Reactivity
Source: Preprints.org preprint supplement (doi:10.20944/preprints202307.0037.v1), 2023-07-04
Supplement: Supplementary file 1 [file supplementary]

New Janus Tricyclic Laddersiloxanes: Synthesis, Characterization and Reactivity

Yujia Liua*, Midori Tokudaa, Nobuhiro Takedaa, Armelle Oualib* and Masafumi Unnoa*

1. Gunma University, Department of Chemistry and Chemical Biology, 1-5-1 Tenjin-cho, Kiryu 376-8515, Japan
2. ICGM, Univ. Montpellier, CNRS, ENSCM, 1919 route de Mende, Montpellier 34293 Cedex 05, France

**Supplementary Materials**

| **Table of contents** | **Pages** |
| --- | --- |
| 1. Characterization data for synthetic compounds **6-14** | S2 |
| 2. 1H, 13C and 29Si-NMR spectra for synthetic compounds **6-15** | S6 |
| 3. MALDI-TOF MS Spectra for synthetic compounds **6-15** | S21 |
| 4. Thermogravimetry/Differential Thermal Analysis (TG/DTA) for compounds **6-14** | S26 |

**1. Characterization data for synthetic compounds 6-14**

**6-8-6 tricyclic laddersiloxane (6)**

**1H NMR (600.17 MHz, CDCl3)**: δ = 5.95-6.16 (m, 24H) ppm.

**29Si NMR (119.24 MHz, CDCl3)**: δ = –35.21, –69.15 ppm.

**13C NMR (150.91 MHz, CDCl3)**: δ = 128.65, 132.64, 133.07, 136.44, 137.39, 137.85 ppm.

**MALDI-TOF MS (m/z)**:514.96 ([M+H]+, calcd 514.02).

**Elemental analysis**: Calcd for C16H24O8Si6: C, 37.47; H, 4.72. Found: C, 37.15; H, 4.79.

**6-8-6 tricyclic laddersiloxane (7)**

**1H NMR (600.17 MHz, CDCl3)**: δ = 1.74 (d, *J* = 7.90 Hz, 4H), 1.80 (d, *J* = 7.90 Hz, 4H), 4.93-5.04 (m, 8H), 5.74-5.86 (m, 4H), 5.95 (dd, *J* = 20.62, 14.43 Hz, 4H), 6.07 (dd, *J* = 20.62, 4.12 Hz, 4H), 6.14 (dd, *J* = 14.43, 4.12 Hz, 4H) ppm.

**29Si NMR (119.24 MHz, CDCl3)**: δ = –15.78, –69.17 ppm.

**13C NMR (150.91 MHz, CDCl3)**: δ = 22.23, 23.25, 115.99, 116.06, 128.60, 131.45, 131.58, 137.83 ppm.

**MALDI-TOF MS (m/z)**:570.76 ([M+H]+, calcd 570.08).

**Elemental analysis**: Calcd for C20H32O8Si6⋅H2O: C, 40.92; H, 5.84. Found: C, 40.77; H, 5.85.

**6-8-6 tricyclic laddersiloxane (8)**

**1H NMR (600 .17 MHz, CDCl3)**: δ = 0.31-0.38 (m, 6H), 5.94-6.13 (m, 18H) ppm.

**29Si NMR (119.24 MHz, CDCl3)**: δ = –19.29, –19.39, –19.64, –19.77, –69.19, –69.25 ppm.

**13C NMR (150.91 MHz, CDCl3)**: δ = –1.09, –0.82, –0.79, –0.73, 128.68, 128.76, 128.85, 128.89, 134.16, 134.40, 134.85, 134.93, 135.03, 135.10, 135.90, 136.16, 137.63, 137.66, 137.73, 137.79 ppm.

**MALDI-TOF MS (m/z)**:486.89 ([M+H]+, calcd 486.02).

**Elemental analysis**: Calcd for C14H24O8Si6⋅0.5H2O: C, 33.78, H, 5.06. Found: C, 33.75; H, 5.03.

**6-8-6 tricyclic laddersiloxane (9)**

**1H NMR (600.17 MHz, CDCl3)**: δ = 5.33 (dd, *J* = 19.59, 15.12 Hz, 0.33H), 5.39 (dd, *J* = 14.78, 4.47 Hz, 0.33H), 5.52 (dd, *J* = 19.59, 4.47 Hz, 0.33H), 5.89-6.24 (m, 16.68H), 6.29 (dd, *J* = 19.93, 14.78 Hz, 0.33H), 6.99 (t, *J* = 7.90 Hz, 1H), 7.22-7.24 (m, 0.5H), 7.35-7.47 (m, 6H), 7.56 (dd, *J* = 7.90, 1.37 Hz, 1H), 7.66 (dd, *J* = 7.90, 1.37 Hz, 0.5H), 7.76 (dd, *J* = 7.90, 1.37 Hz, 1H) ppm.

**29Si NMR (119.24 MHz, CDCl3)**: δ = –33.86, –33.96, –34.02, –34.38, –68.40, –68.86, –69.00, –69.17 ppm.

**13C NMR (150.91 MHz, CDCl3)**: δ = 127.84, 127.94, 128.04, 128.08, 128.52, 128.74, 130.57, 130.63, 130.67, 130.73, 131.62, 132.14, 132.57, 132.80, 133.48, 133.65, 133.89, 133.94, 133.99, 134.01, 134.22, 134.40, 136.37, 136.54, 137.16, 137.46, 137.96, 138.02 ppm.

**MALDI-TOF MS (m/z)**:634.78 ([M+Na]+, calcd 635.03), 650.71 ([M+K]+, calcd 651.00).

**6-8-6 tricyclic laddersiloxane (10**):

**1H NMR (600.17 MHz, CDCl3)**: δ = 0.19-0.28 (m, 48H), 0.52-0.99 (m, 32H), 7.27-7.37 (m, 24H), 7.44-7.49 (m, 16H) ppm.

**29Si NMR (119.24 MHz, CDCl3)**: δ = –1.12, ­­–1.18, –1.31, –7.94, –55.06 ppm.

**13C NMR (150.91 MHz, CDCl3)**: δ = –3.50, –3.47, –3.25, 5.08, 6.46, 6.60, 6.68, 6.92, 6.96, 127.69, 127.81, 127.91, 128.85, 129.03, 133.71, 133.84, 133.94, 134.04, 138.99, 139.07, 139.39 ppm.

**MALDI-TOF MS (m/z)**:1623.16 ([M+Na]+, calcd 1623.56).

**Elemental analysis**: Calcd for C80H120O8Si14⋅0.5H2O: C, 59.28; H, 7.59. Found: C, 59.00; H, 7.61.

**6-8-6 tricyclic laddersiloxane (11**):

**1H NMR (600.17 MHz, CDCl3)**: δ = 0.22 (s, 12H), 0.24 (s, 12H), 0.25 (s, 24H), 0.55-0.82 (m, 32H), 1.40- 1.43 (m, 8H), 7.31-7.36 (m, 24H), 7.47-7.49 (m, 16H) ppm.

**29Si NMR (119.24 MHz, CDCl3)**: δ = –1.16, ­­–3.80, –3.91, –8.46, –55.41 ppm.

**13C NMR (150.91 MHz, CDCl3)**: δ = –3.48, –3.46, –2.85, –2.81, 5.04, 6.89,17.27, 17.38, 19.86, 20.02, 20.38, 20.52, 127.85, 127.87, 127.91, 128.88, 128.95, 129.02, 133.60, 133.65, 133.71, 138.98, 139.54, 139.60 ppm.

**MALDI-TOF MS (m/z)**:1680.35 ([M+Na]+, calcd 1680.63)

**Elemental analysis**: Calcd for C84H128O8Si14: C, 60.81; H, 7.78. Found: C, 60.47; H, 7.91.

**6-8-6 tricyclic laddersiloxane (12**):

**1H NMR (600.17 MHz, CDCl3)**: δ = 0.10-0.26 (m, 42H), 0.54-0.78 (m, 24H), 7.31-7.34 (m, 18H), 7.46-7.49 (m, 12H) ppm.

**29Si NMR (119.24 MHz, CDCl3)**: δ = –1.10, ­­–1.14, –6.19, –6.36, –6.82, –54.95, –54.99, –55.31, –55.39 ppm.

**13C NMR (150.91 MHz, CDCl3)**: δ = –3.51, –3.48, –3.26, –1.64, –1.49, –1.08, 4.93, 4.99, 6.56, 6.68, 6.81, 6.95, 7.27, 8.83, 9.01, 9.41, 127.70, 127.84, 127.90, 128.87, 128.92, 128.96, 129.01, 133.70, 133.78, 133.86, 133.96, 138.96, 139.02, 139.08, 139.24, 139.44 ppm.

**MALDI-TOF MS (m/z)**:1327.16 ([M+Na]+, calcd 1327.42), 1345.17 ([M+K]+, calcd 1345.40).

**Elemental analysis**: Calcd for C62H96O8Si12⋅2H2O: C, 55.47; H, 7.51. Found: C, 55.49; H, 7.51.

**6-8-6 tricyclic laddersiloxane (13**):

**1H NMR (600.17 MHz, CDCl3)**: δ = 0.095-0.11 (m, 48H), 0.60-0.79 (m, 32H), 1.43-1.49 (m, 8H), 2.770 (s, 4H), 2.774 (s, 4H), 2.79 (s, 8H) ppm.

**29Si NMR (119.24 MHz, CDCl3)**: δ = 5.37, 2.99, 2.93, –8.58, –55.58 ppm.

**13C NMR (150.91 MHz, CDCl3)**: δ = –4.96, –4.39, –4.32, 4.76, 4.94, 17.06, 17.18, 17.96, 18.12, 20.39, 20.49, 29.94, 30.44 ppm.

**MALDI-TOF MS (m/z)**:1460.86 ([M+Na]+, calcd 1460.18).

**Elemental analysis**: Calcd for C44H104Cl8O8Si14⋅H2O: C, 36.29; H, 7.34. Found: C, 34.94; H, 7.30.

**6-8-6 tricyclic laddersiloxane (14**):

**1H NMR (600.17 MHz, CDCl3)**: δ = 0.10-0.25 (m, 42H), 0.59-0.70 (m, 24H), 2.78-2.79 (m, 12H) ppm.

**29Si NMR (119.24 MHz, CDCl3)**: δ = 5.61, ­­5.40, 5.20, –6.17, –6.57, –6.92, –55.12, –55.22, –55.58 ppm.

**13C NMR (150.91 MHz, CDCl3)**: δ = –5.00, –4.80, –4.30, –1.67, –1.55, –1.29, –0.98, 4.58, 4.63, 4.69, 4.75, 4.83, 4.86, 4.92, 8.17, 8.69, 9.07, 9.25, 29.92, 30.02, 30.10 ppm

**MALDI-TOF MS (m/z)**:1162.79 ([M+Na]+, calcd 1162.09).

**Elemental analysis**: Calcd for C32H78Cl6O8Si12⋅2H2O: C, 32.66; H, 7.02. Found: C, 32.49; H, 6.98.

**2. 1H, 13C and 29Si-NMR Spectra for synthetic compounds 6-15**

**
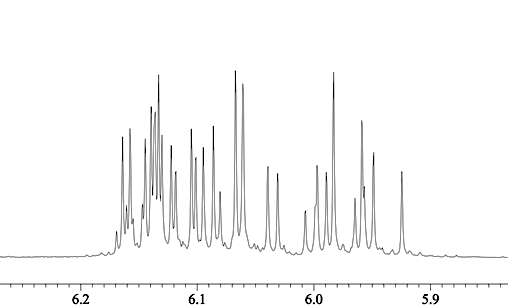

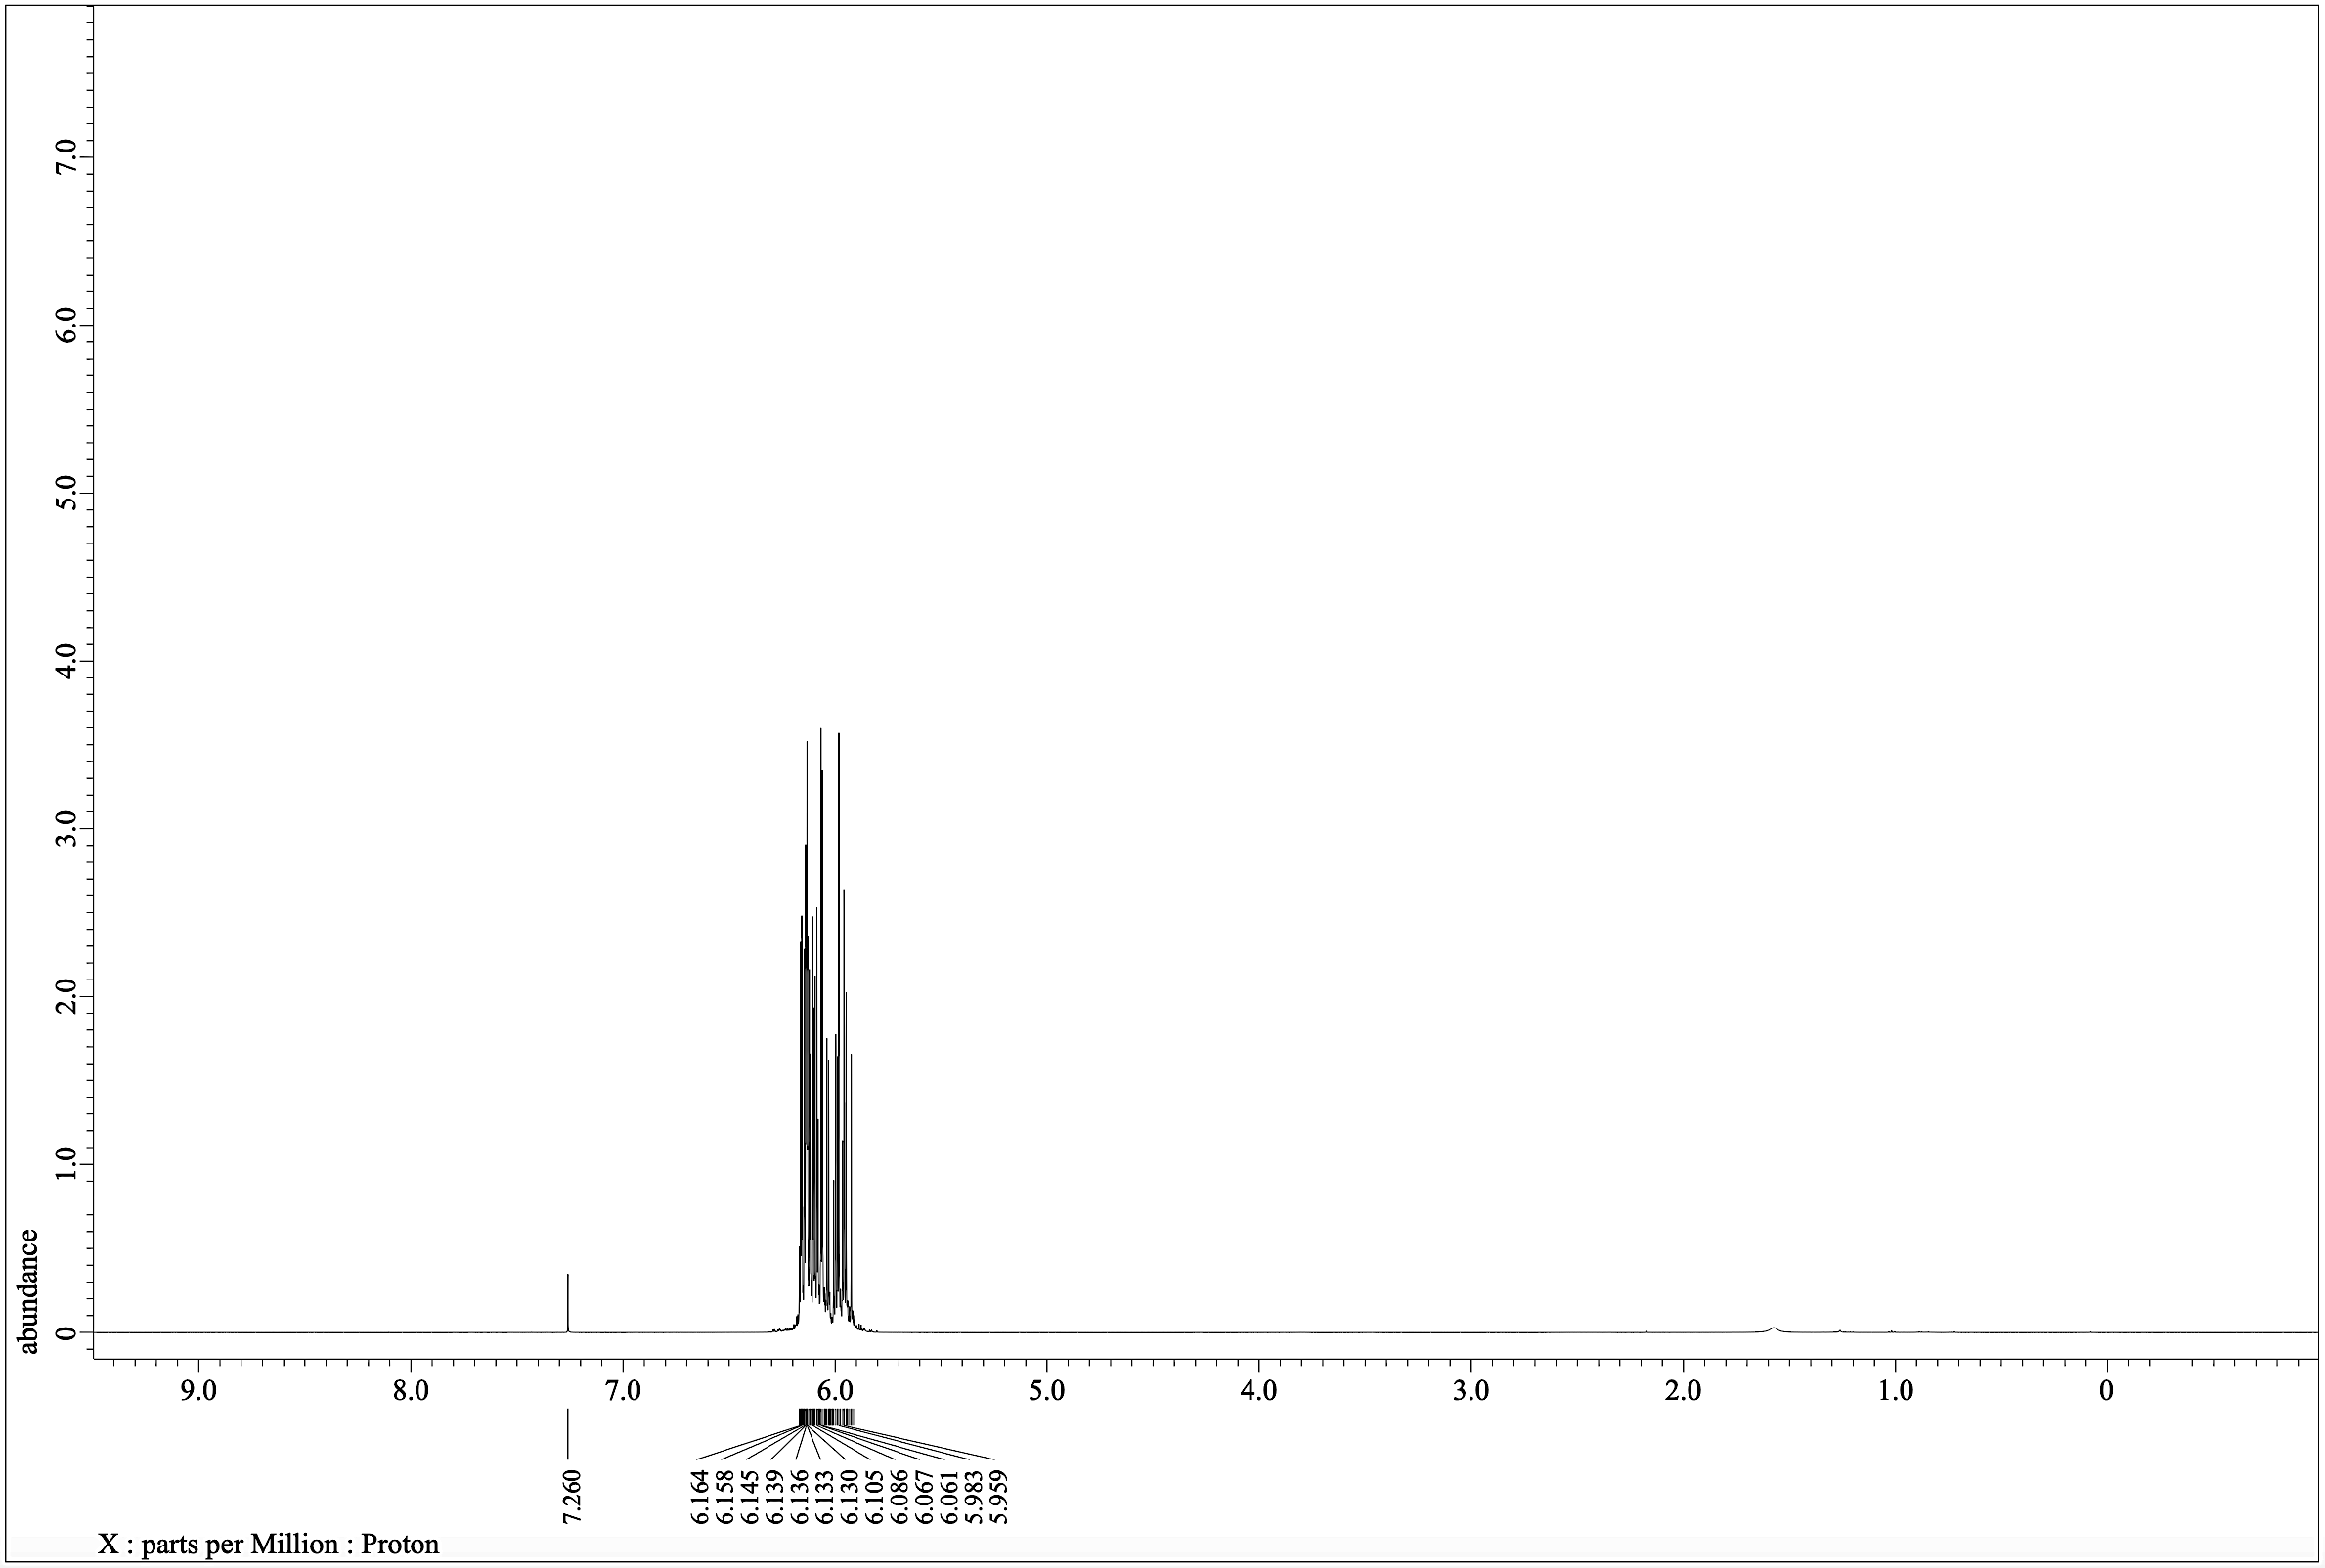
**

**6**

1H NMR (600.17 MHz, CDCl3)

**Figure S1: 1**H NMR spectrum for **6**.


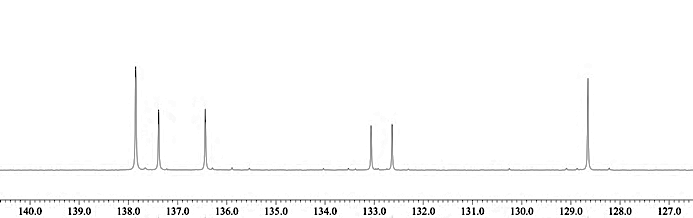

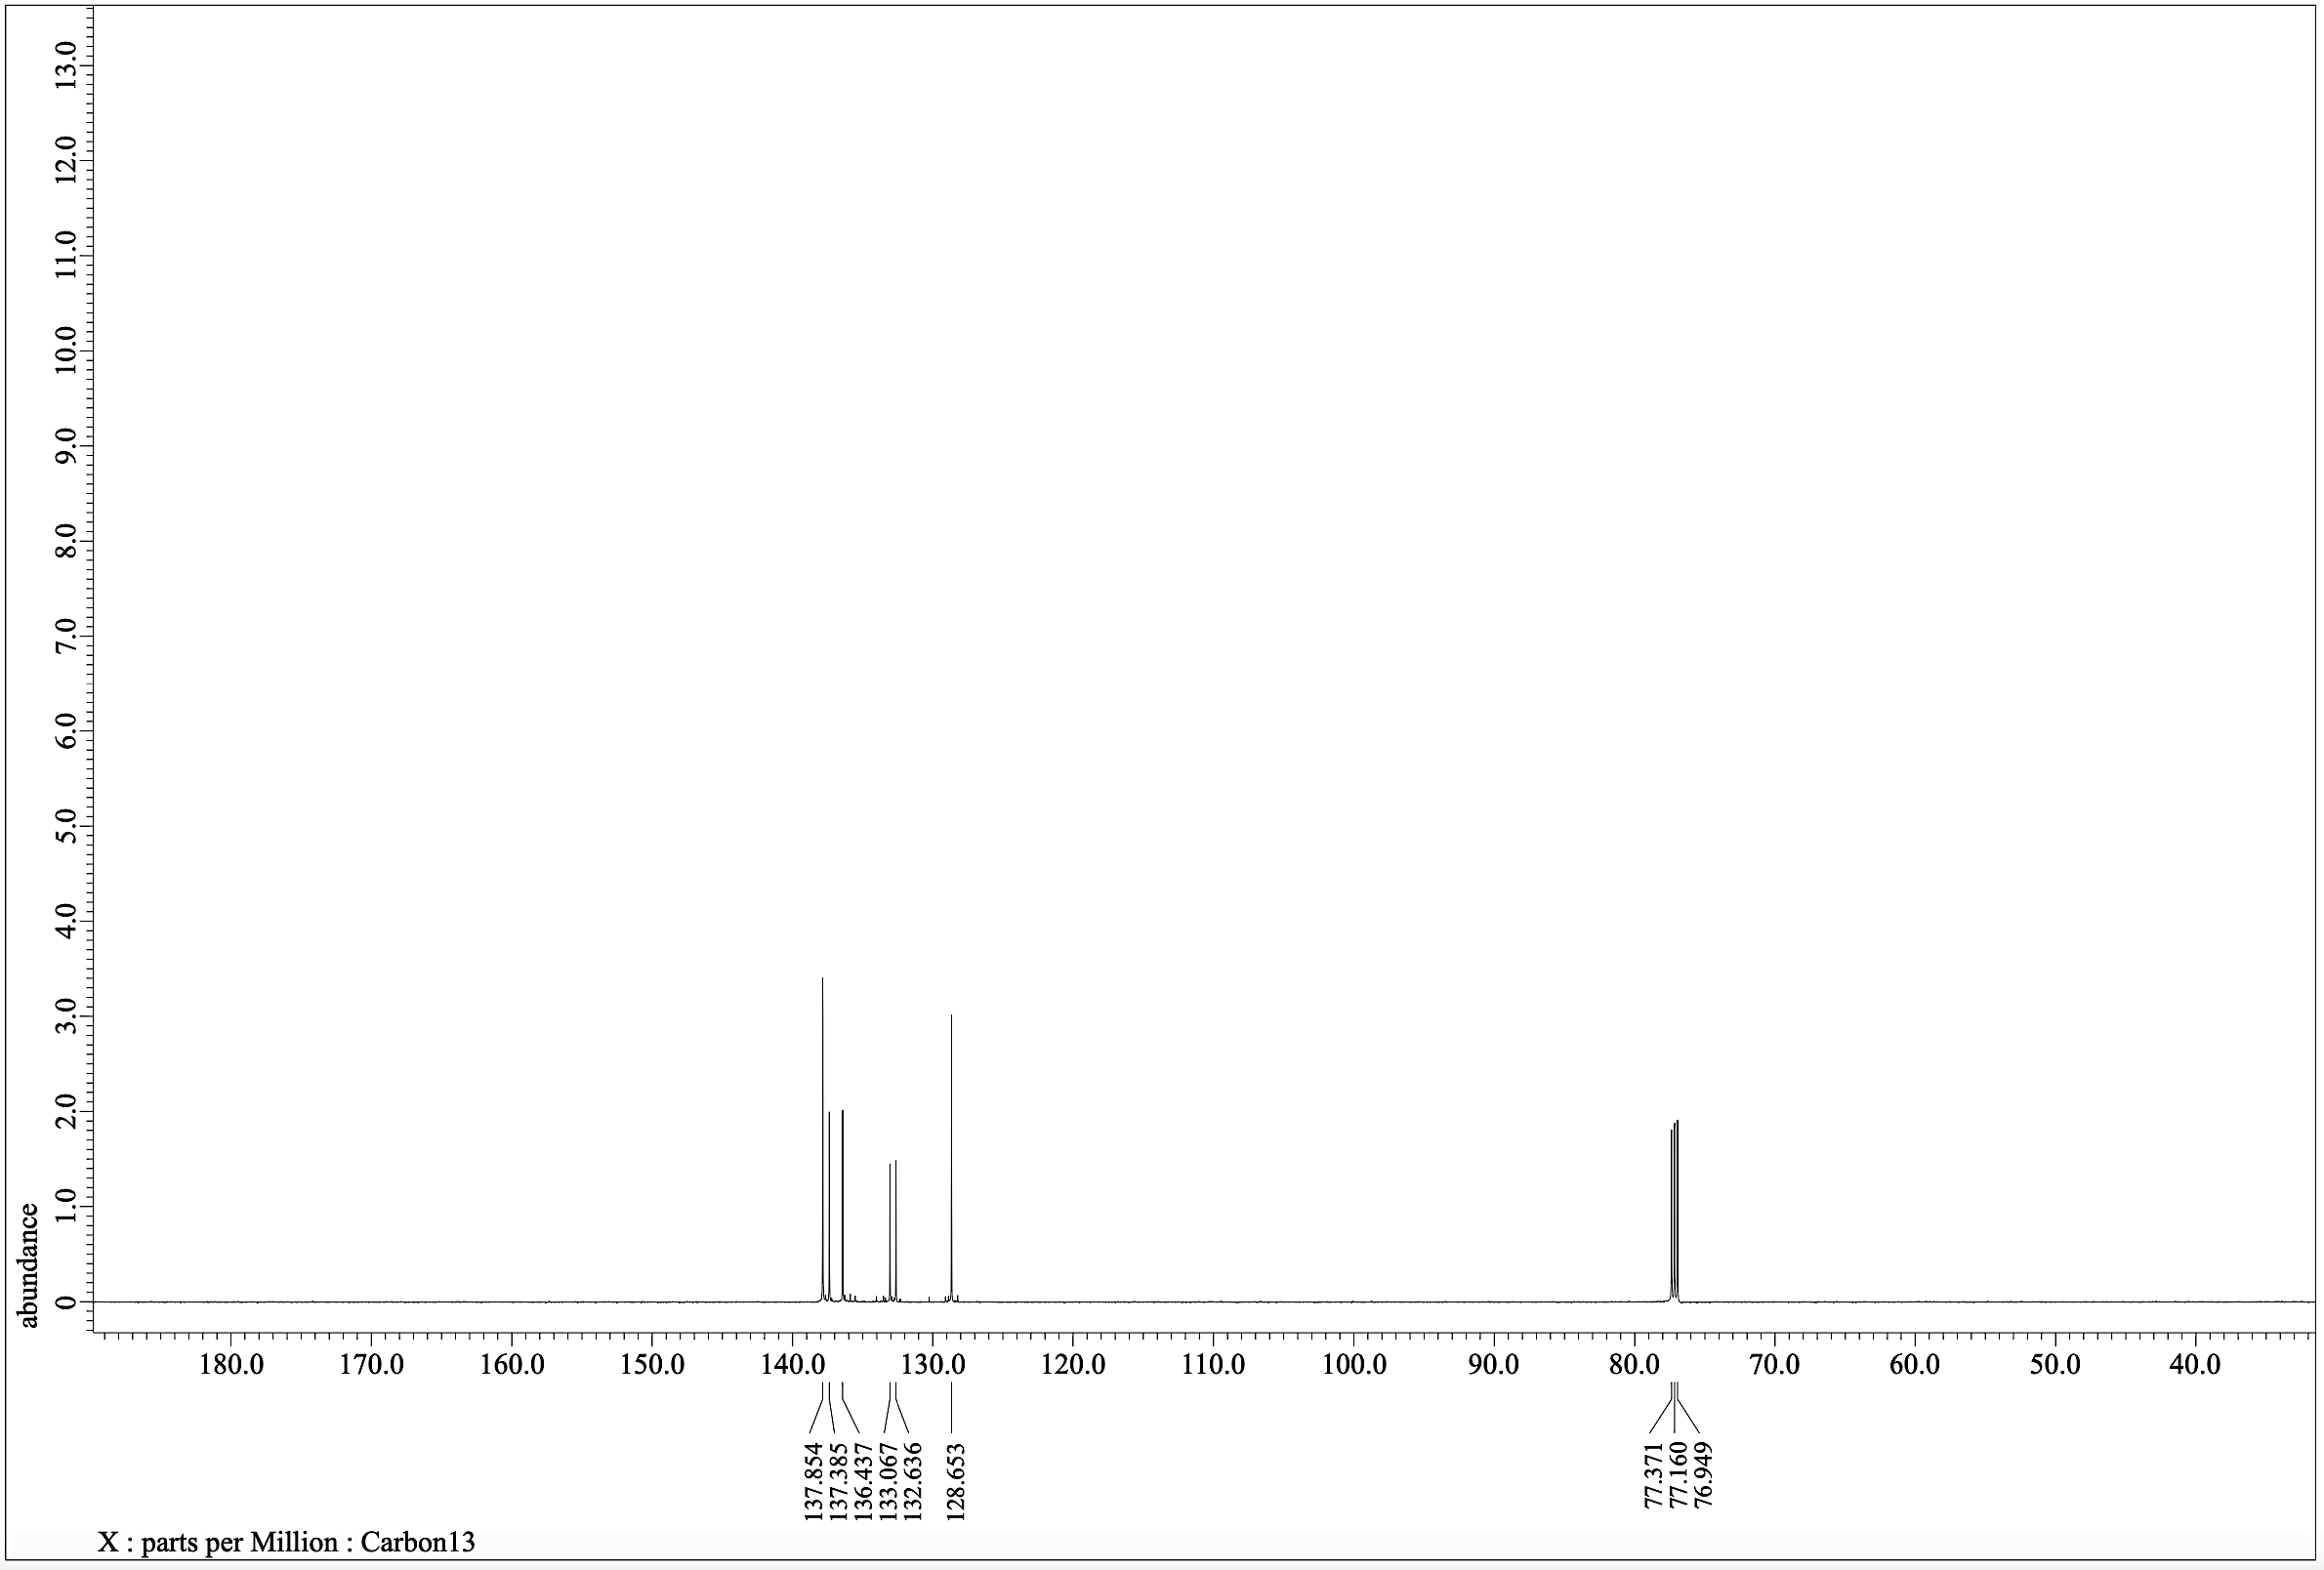


**6**

13C NMR (150.91 MHz, CDCl3)

**Figure S2: 13**C NMR spectrum for **6**.

**
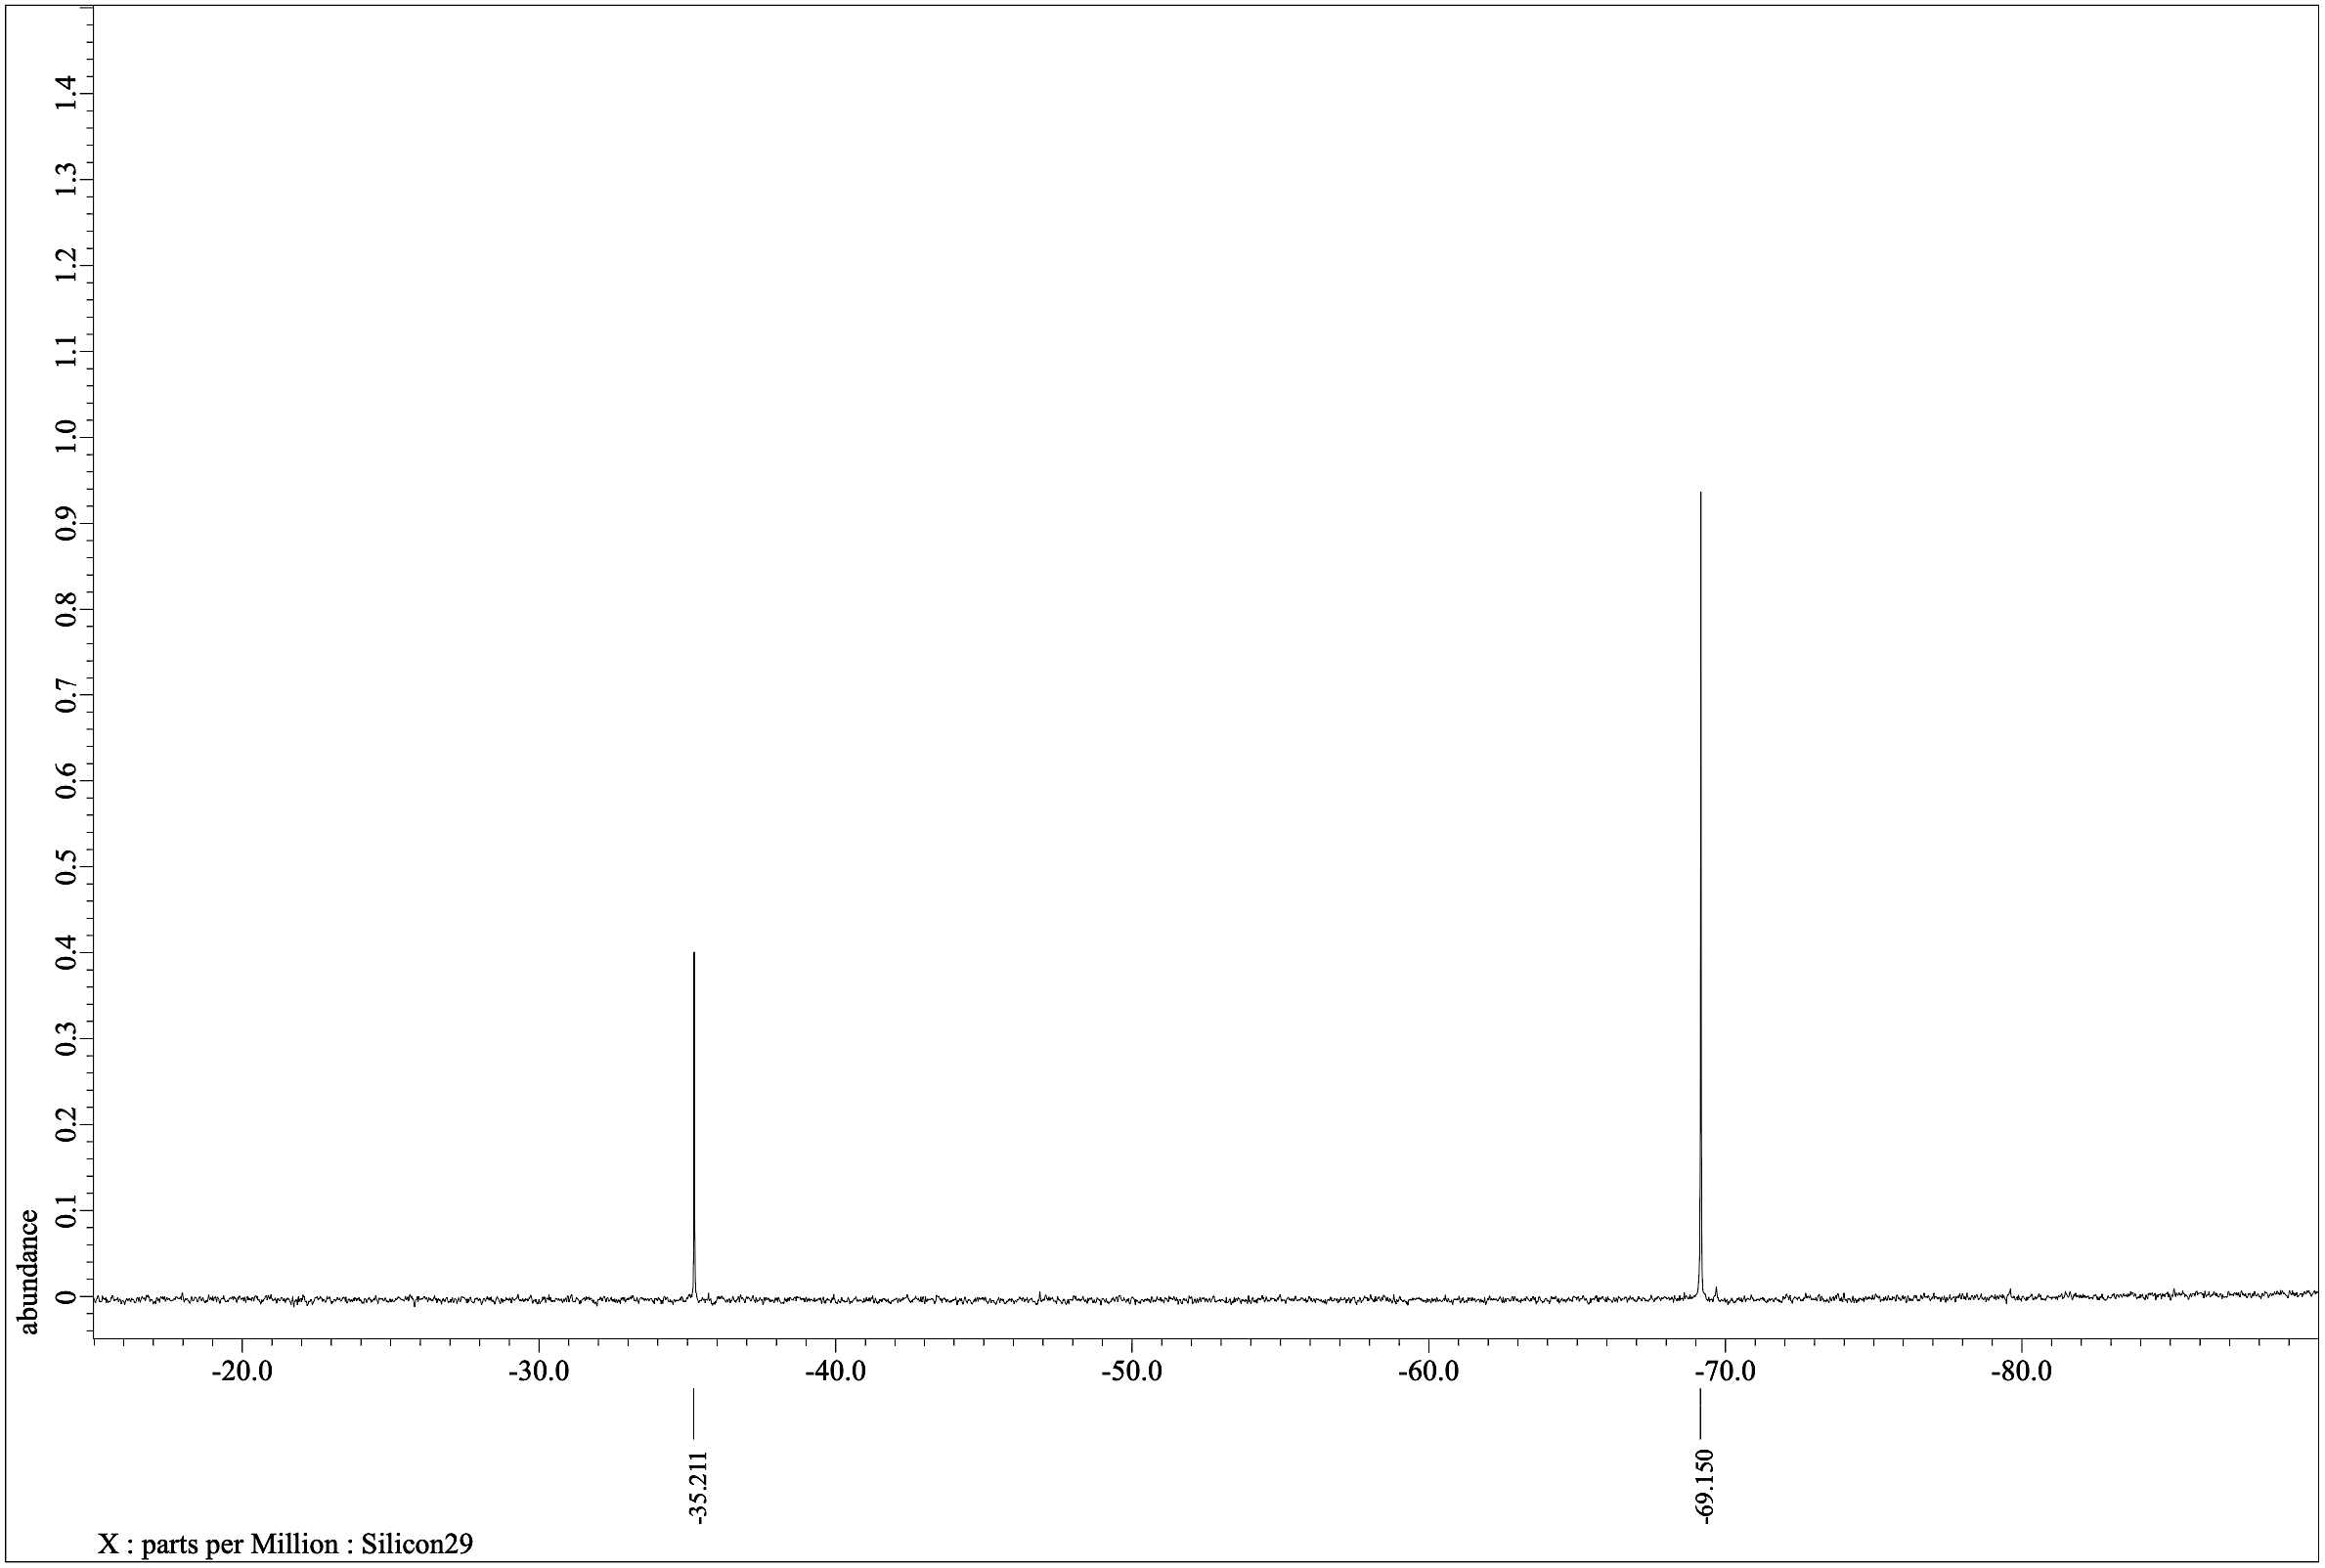
**

**-Si-**

**-Si-**

**6**

29Si NMR (119.24 MHz, CDCl3)

**Figure S3: 29**Si NMR spectrum for **6**.

**
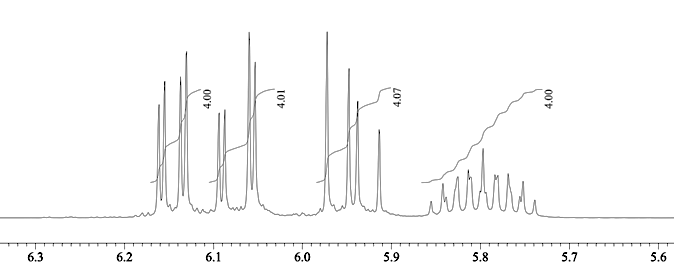

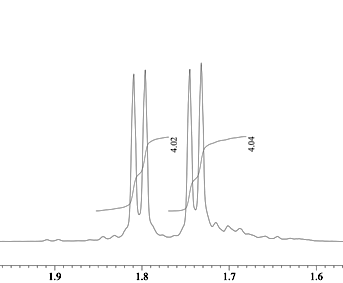

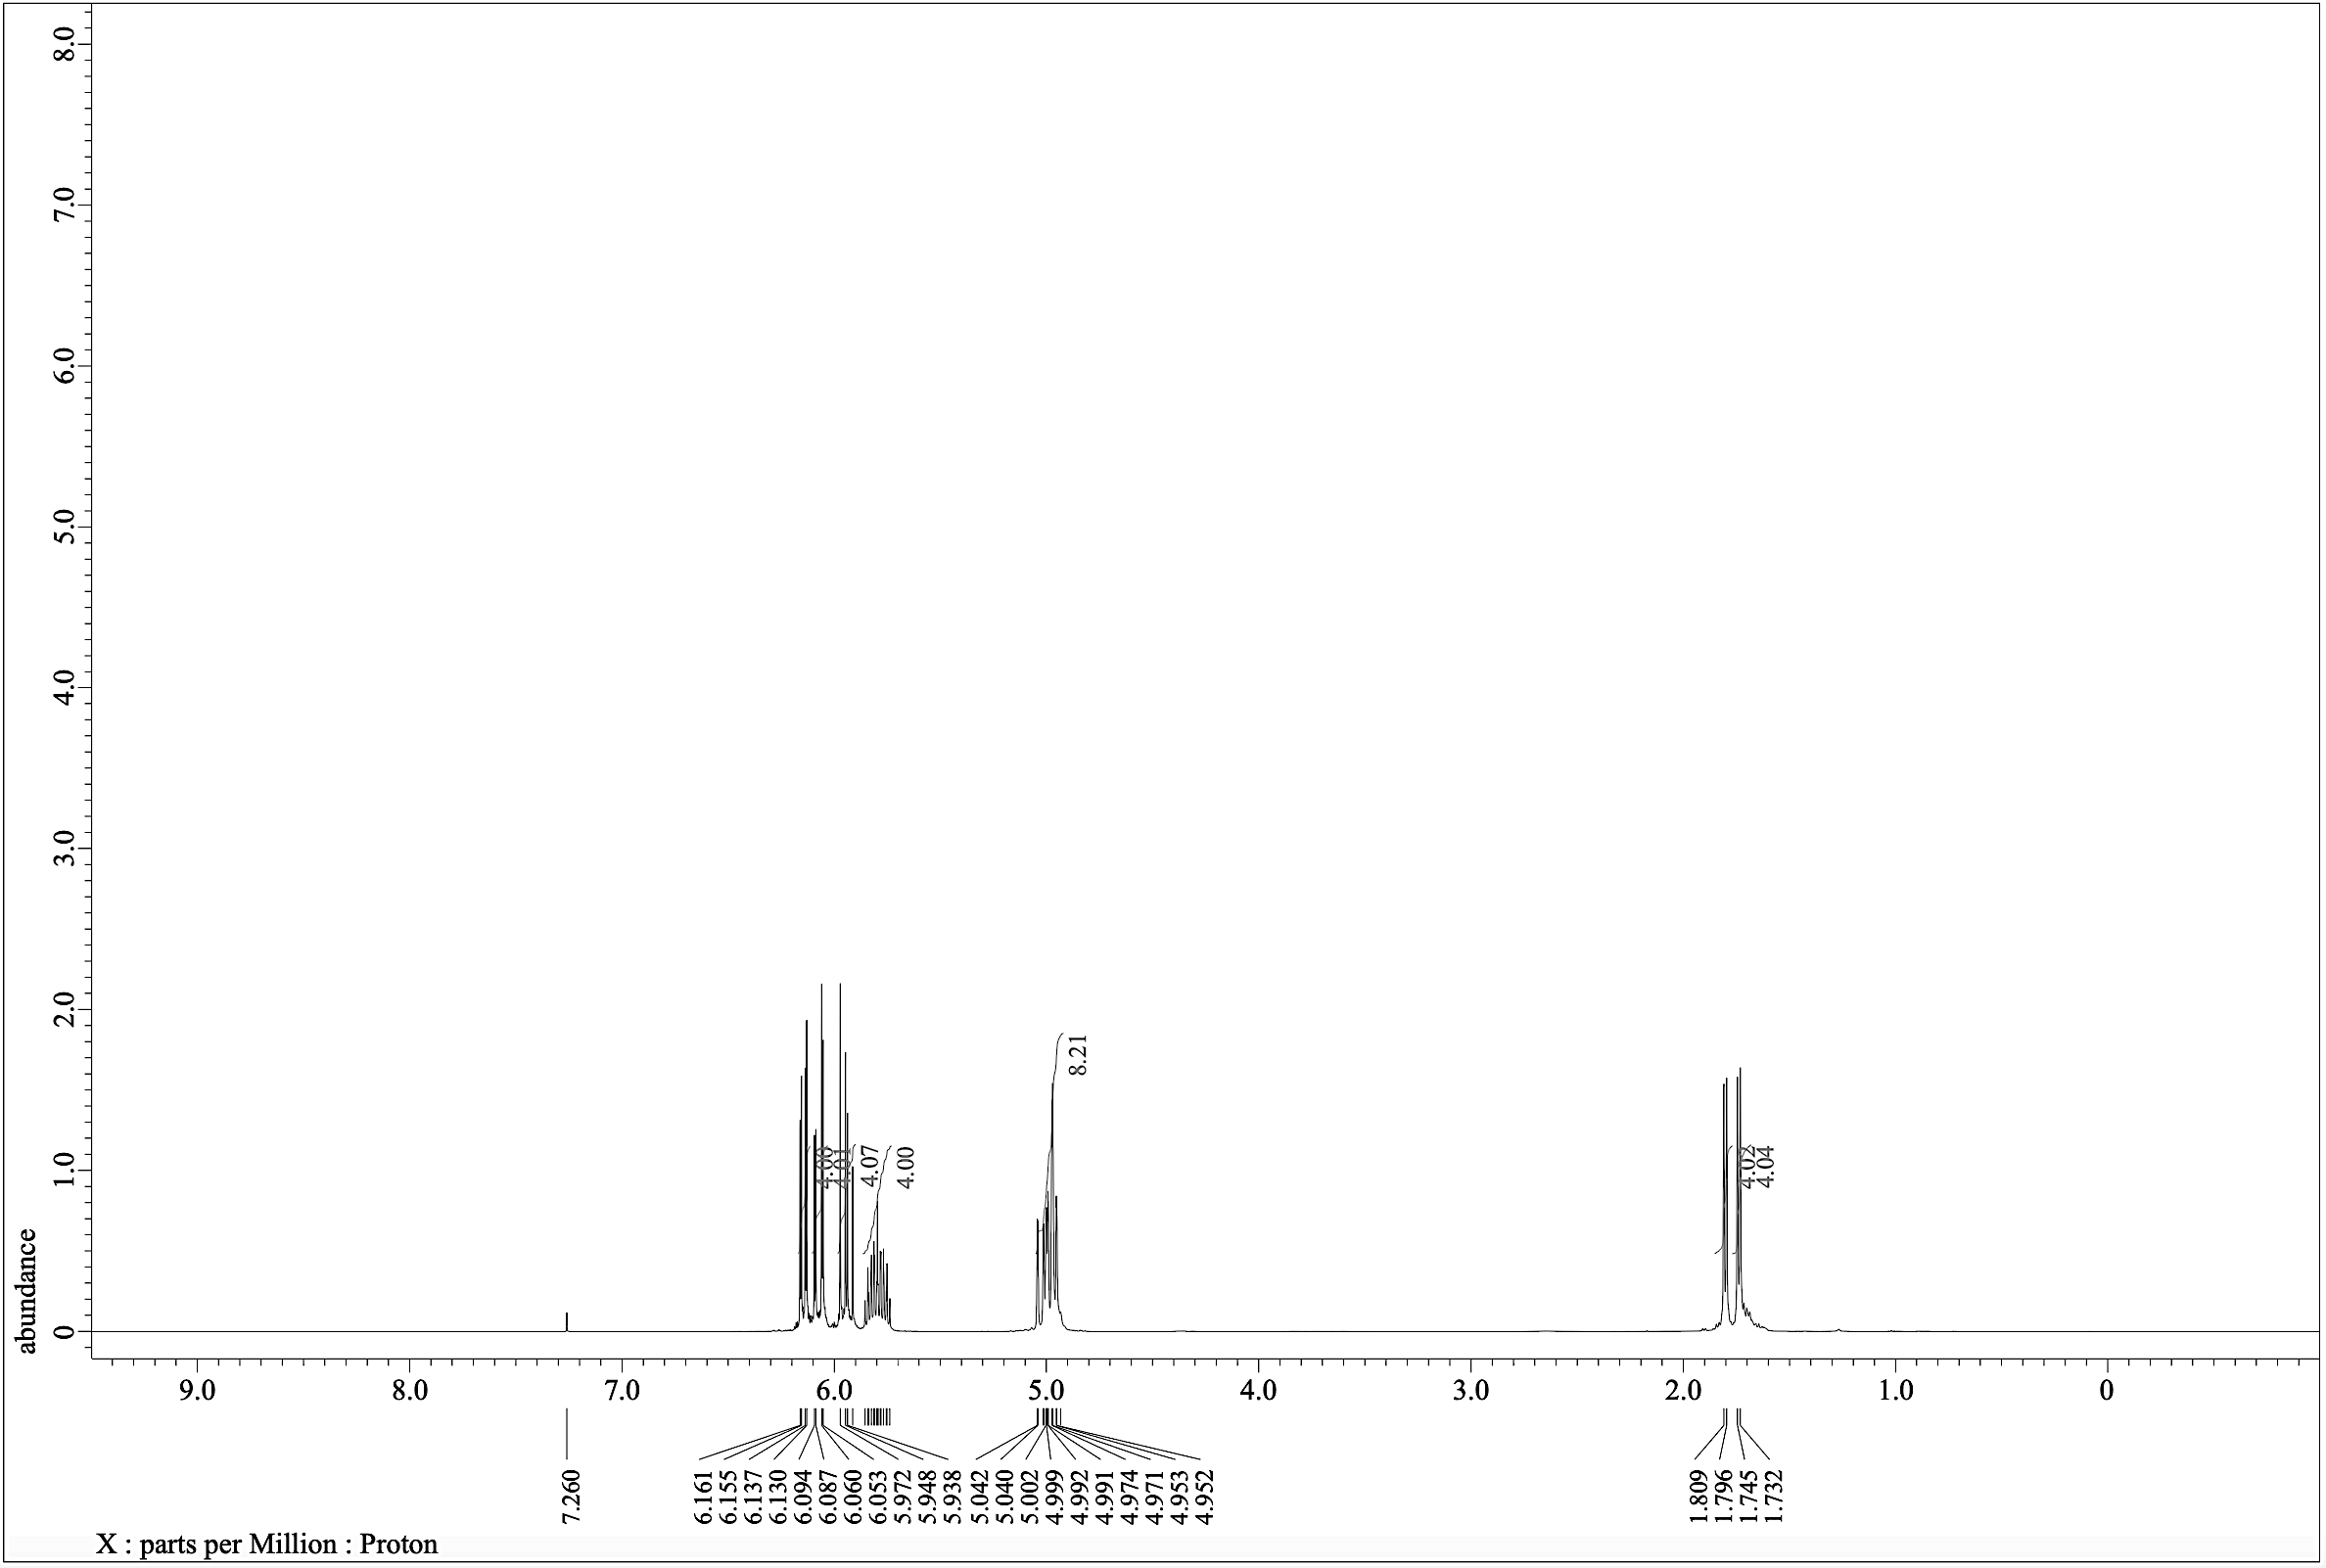
**

1H NMR (600.17 MHz, CDCl3)

**7**

**Figure S4: 1**H NMR spectrum for **7**.

**
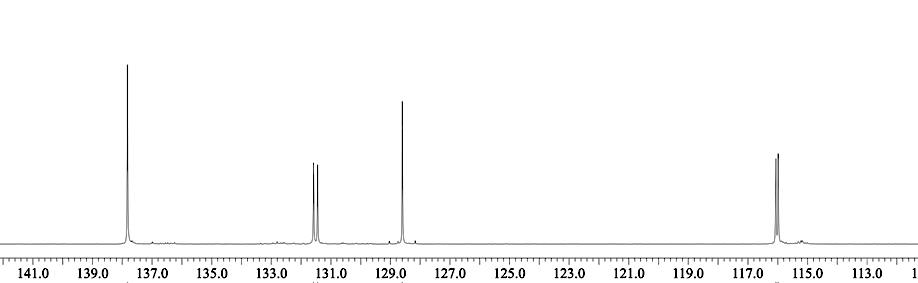

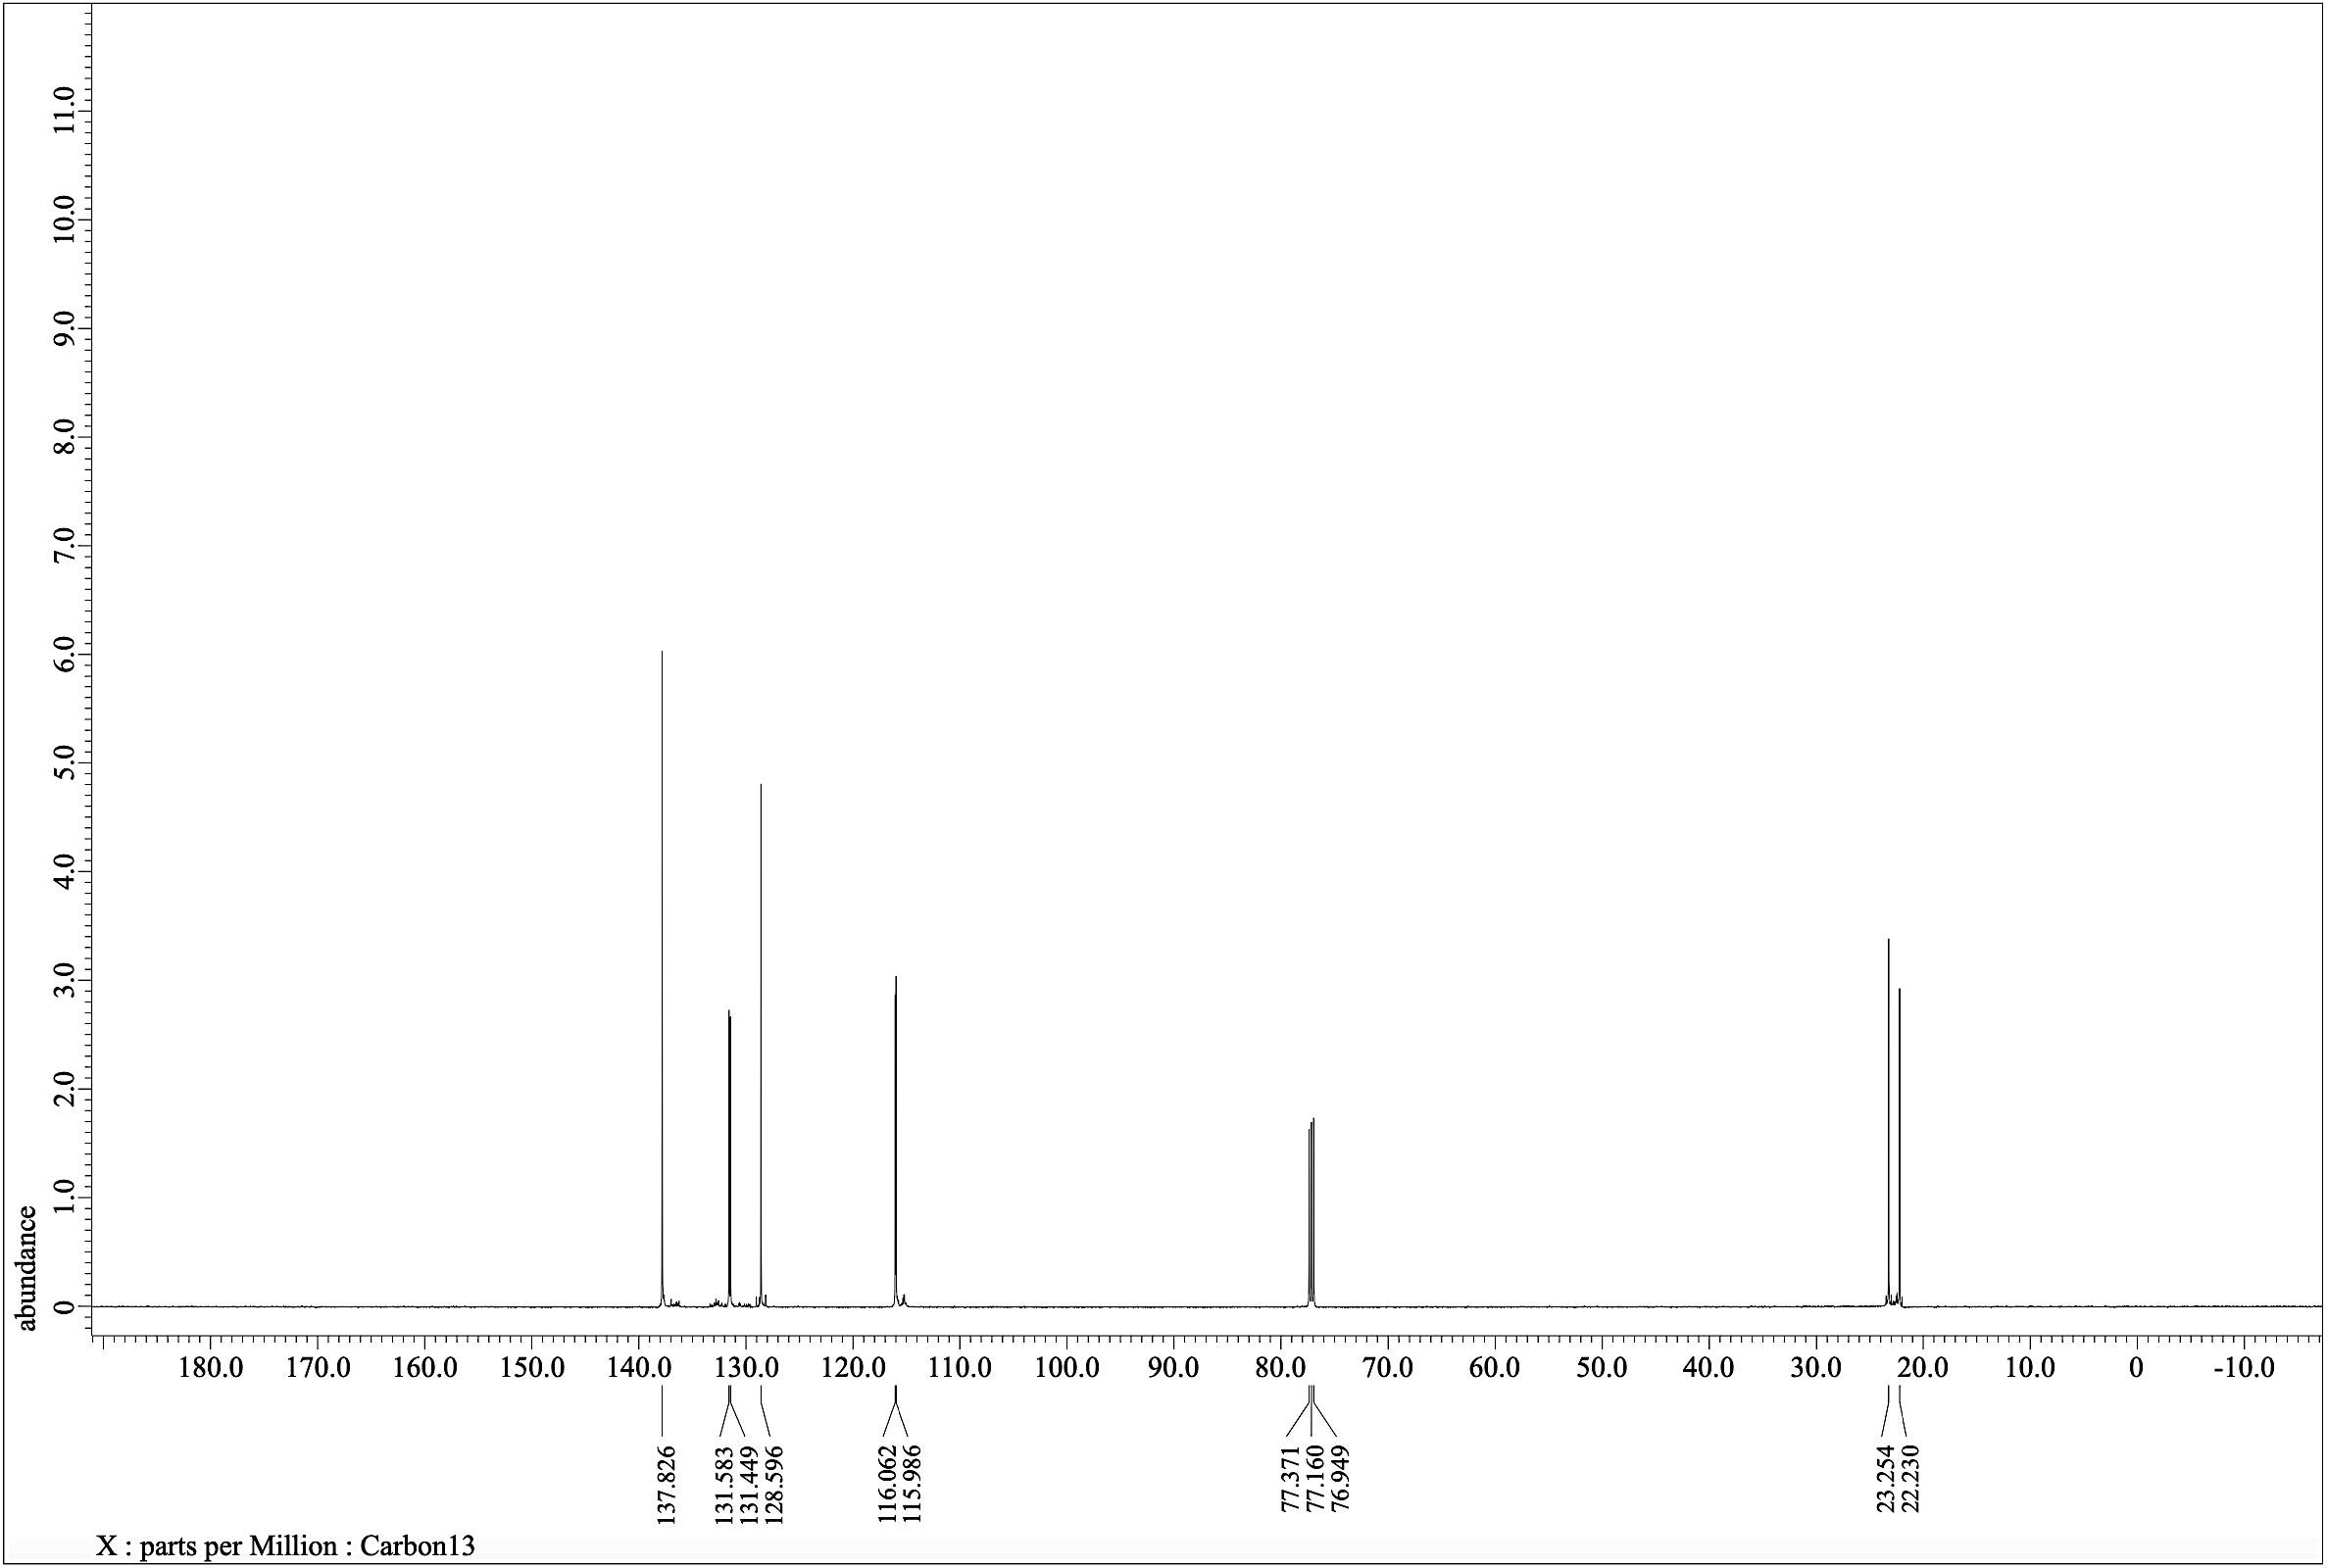
**

**7**

13C NMR (150.91 MHz, CDCl3)

**Figure S5: 13**C NMR spectrum for **7**.

**
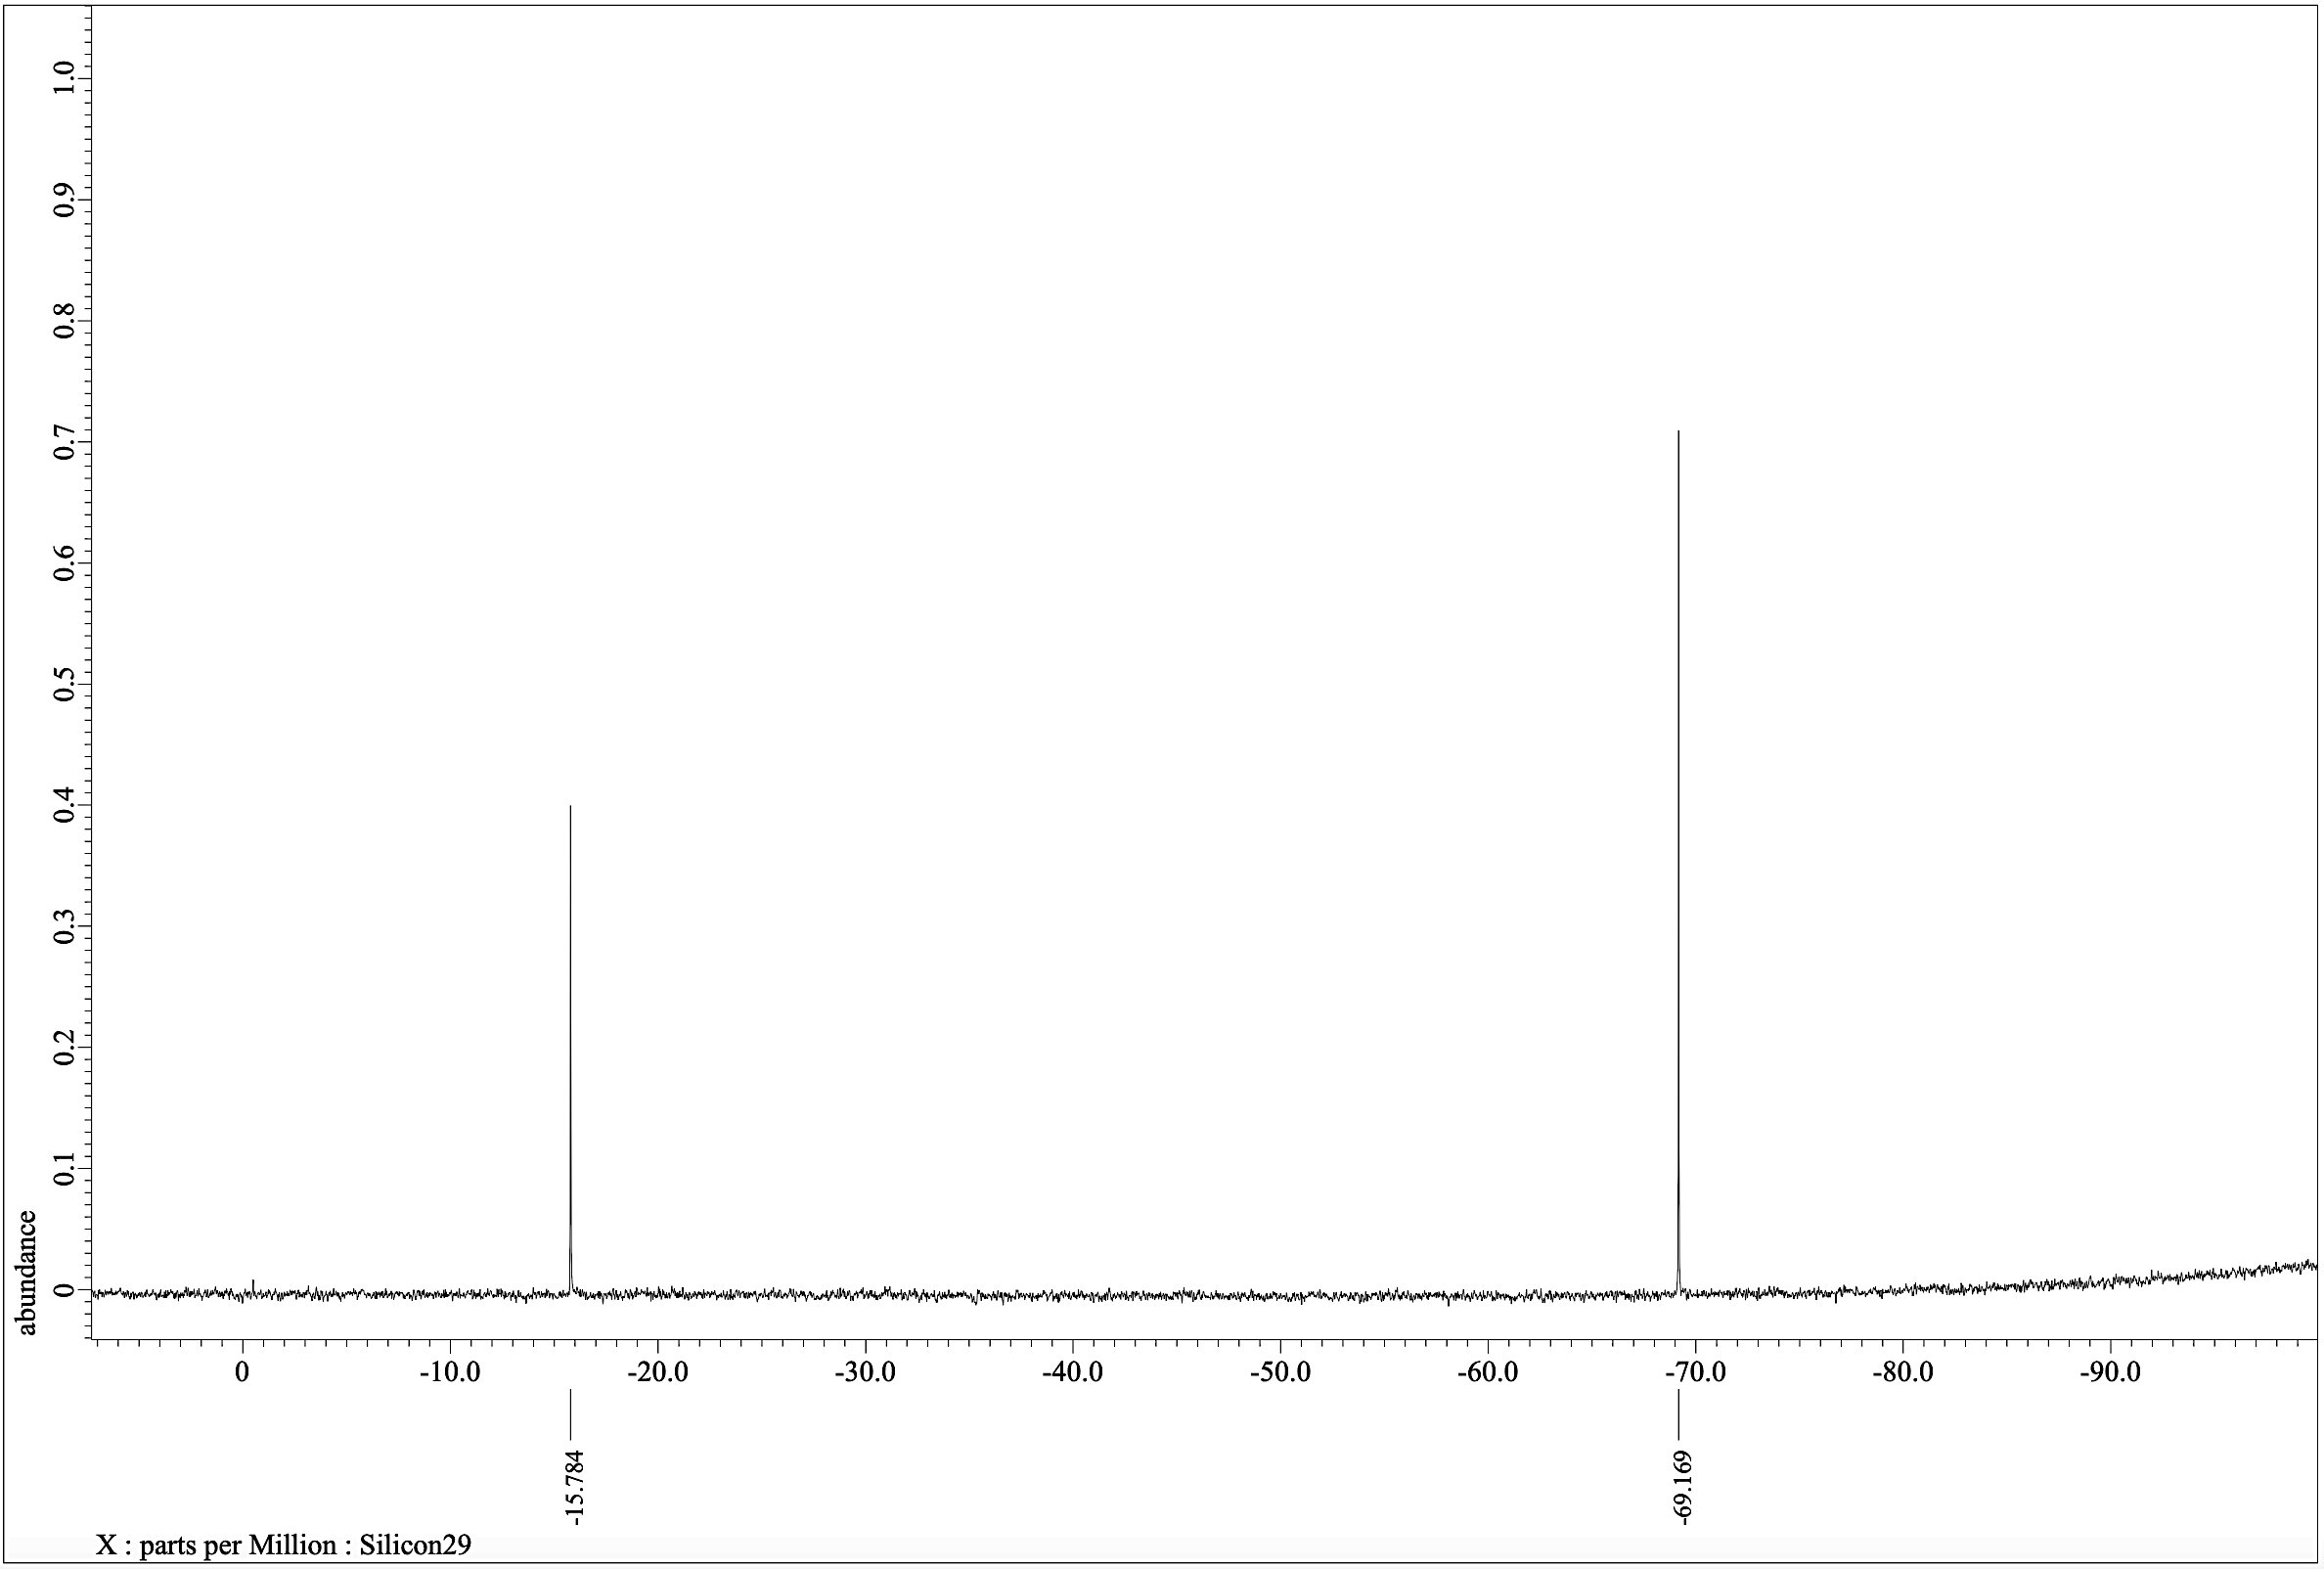
**

**7**

**-Si-**

**-Si-**

29Si NMR (119.24 MHz, CDCl3)

**Figure S6: 29**Si NMR spectrum for **7**.

**
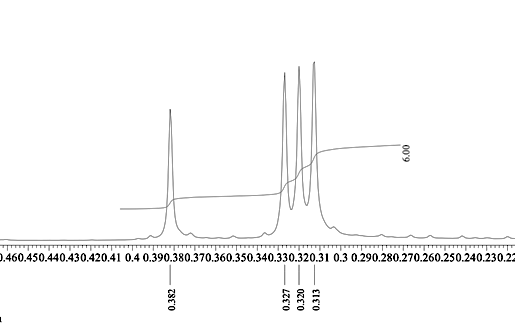

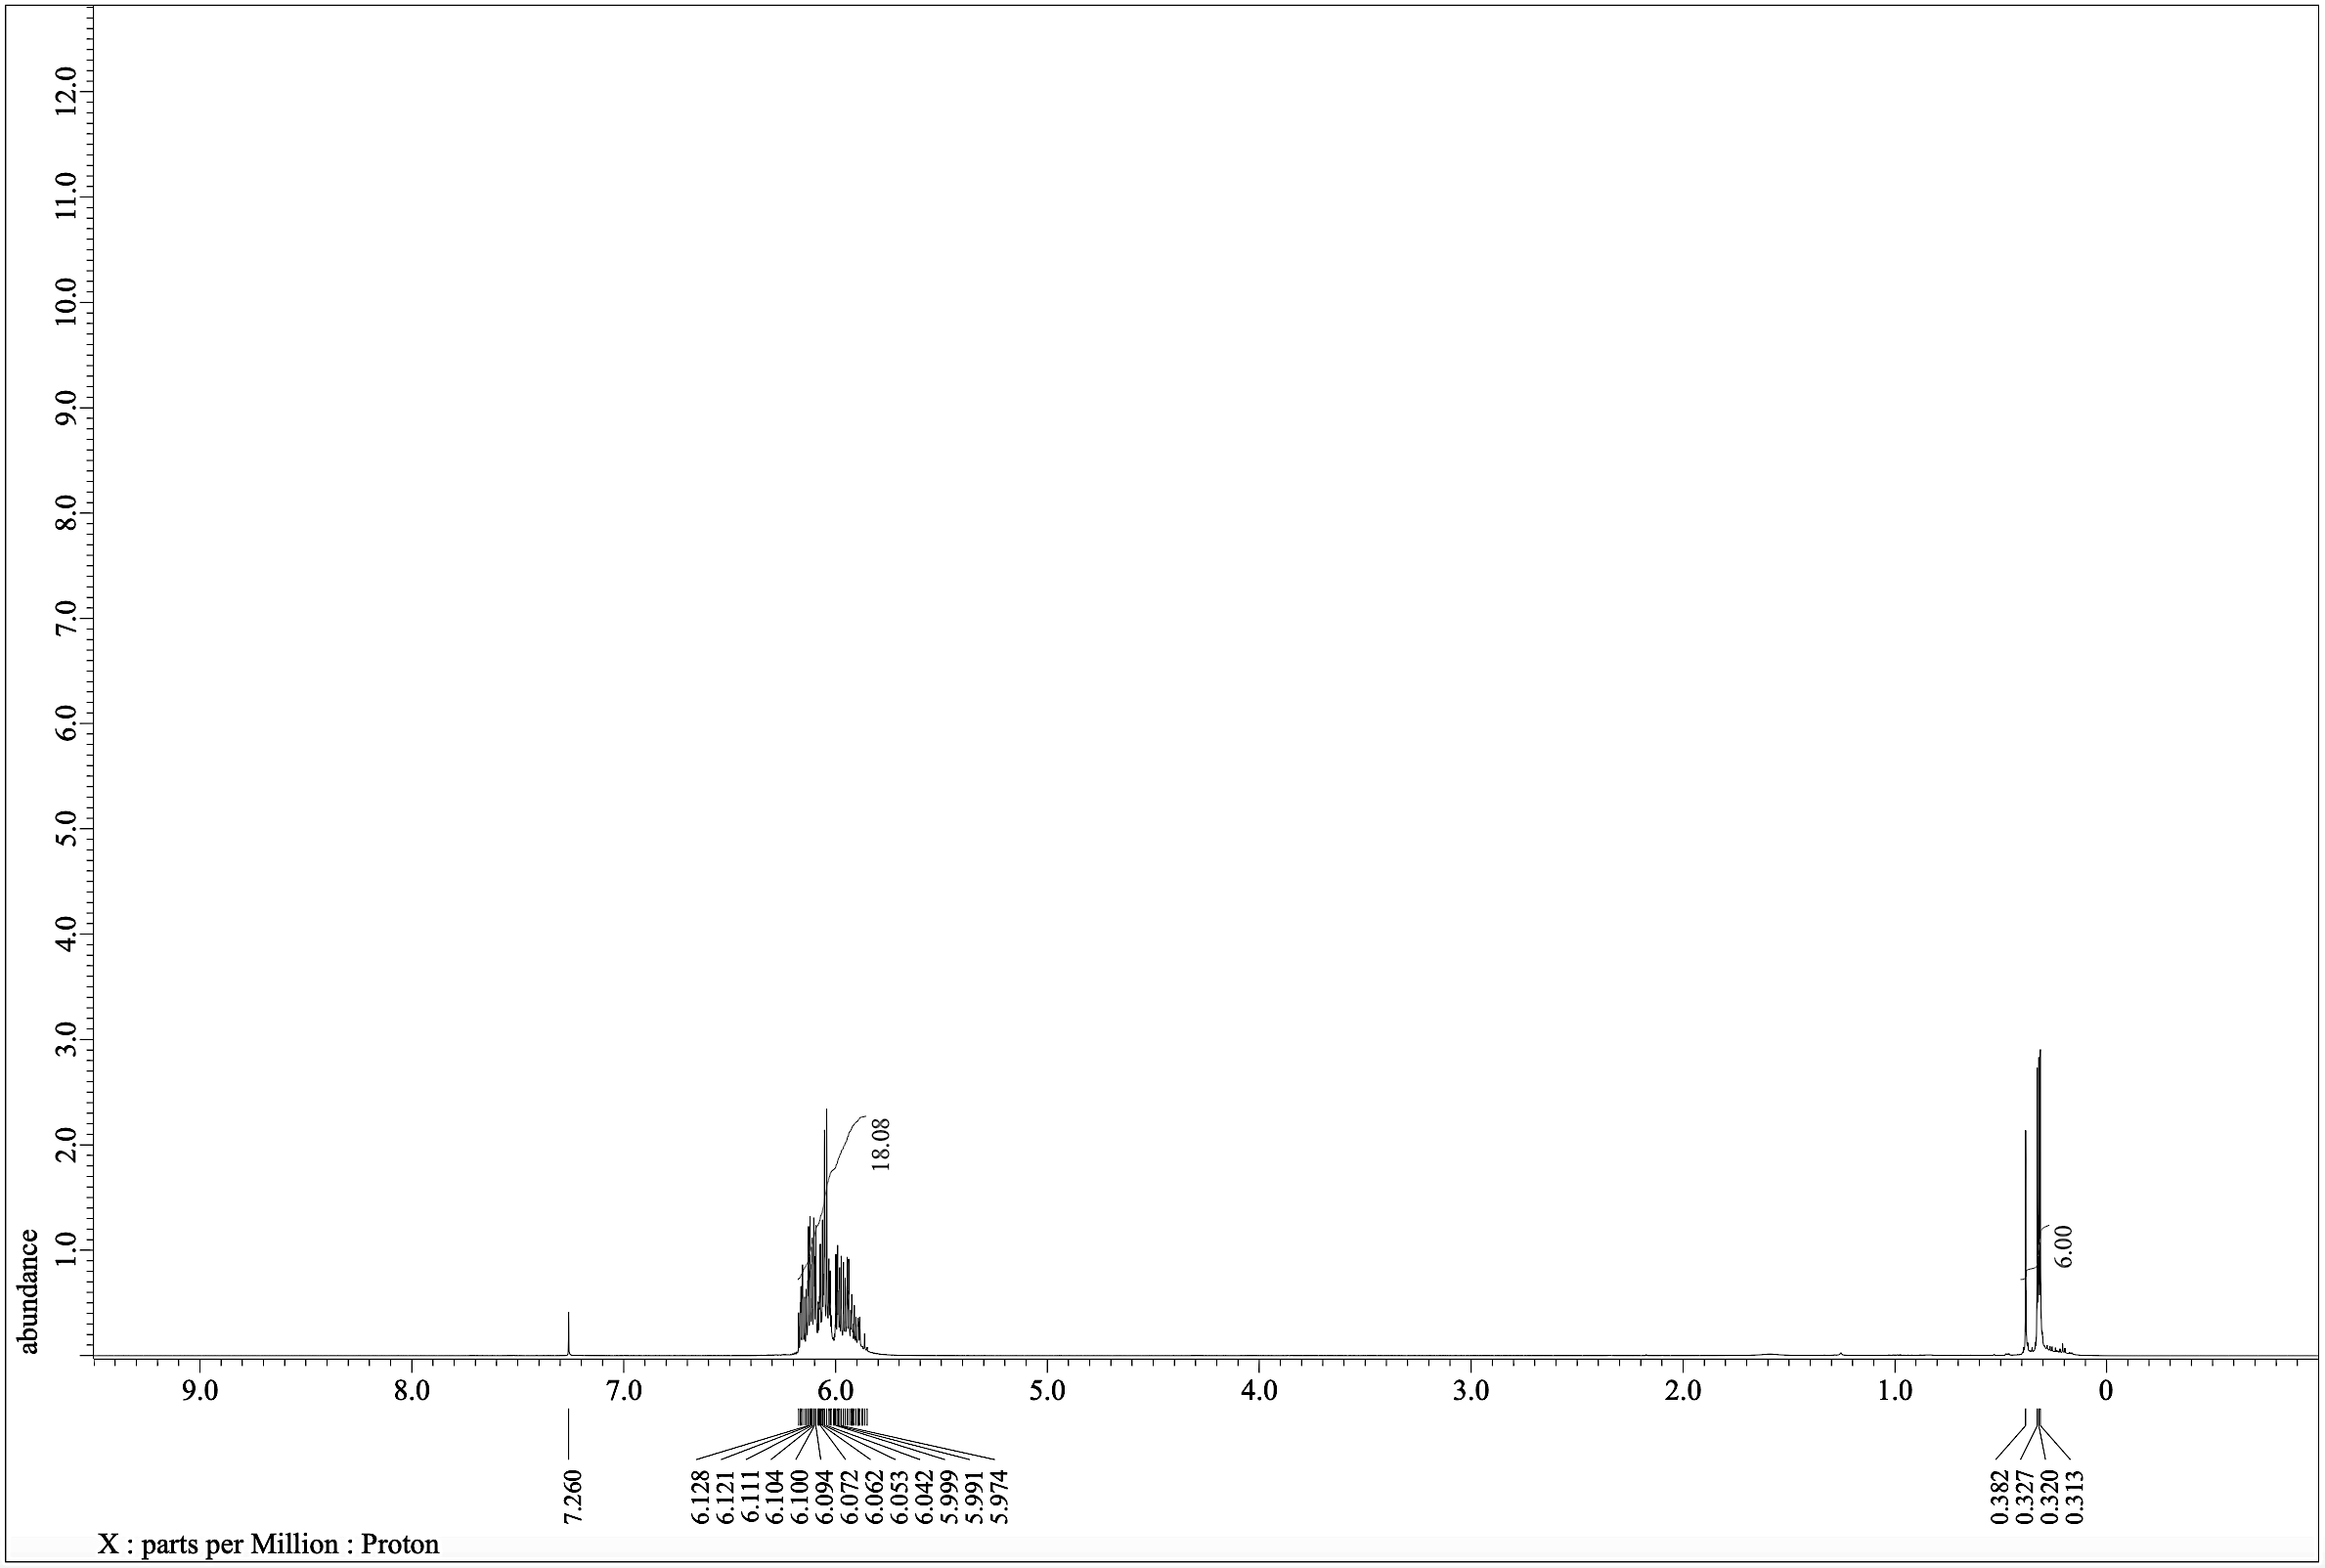
**

**8**

1H NMR (600.17 MHz, CDCl3)

**Figure S7: 1**H NMR spectrum for **8**.


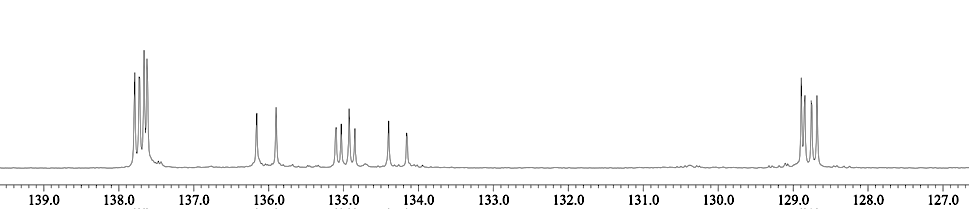

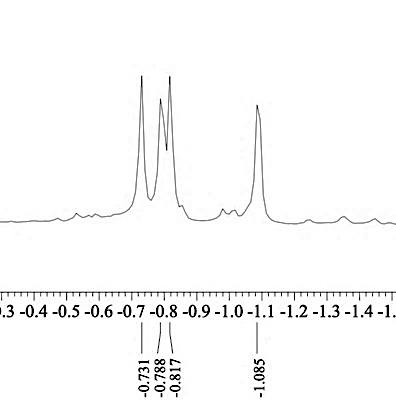

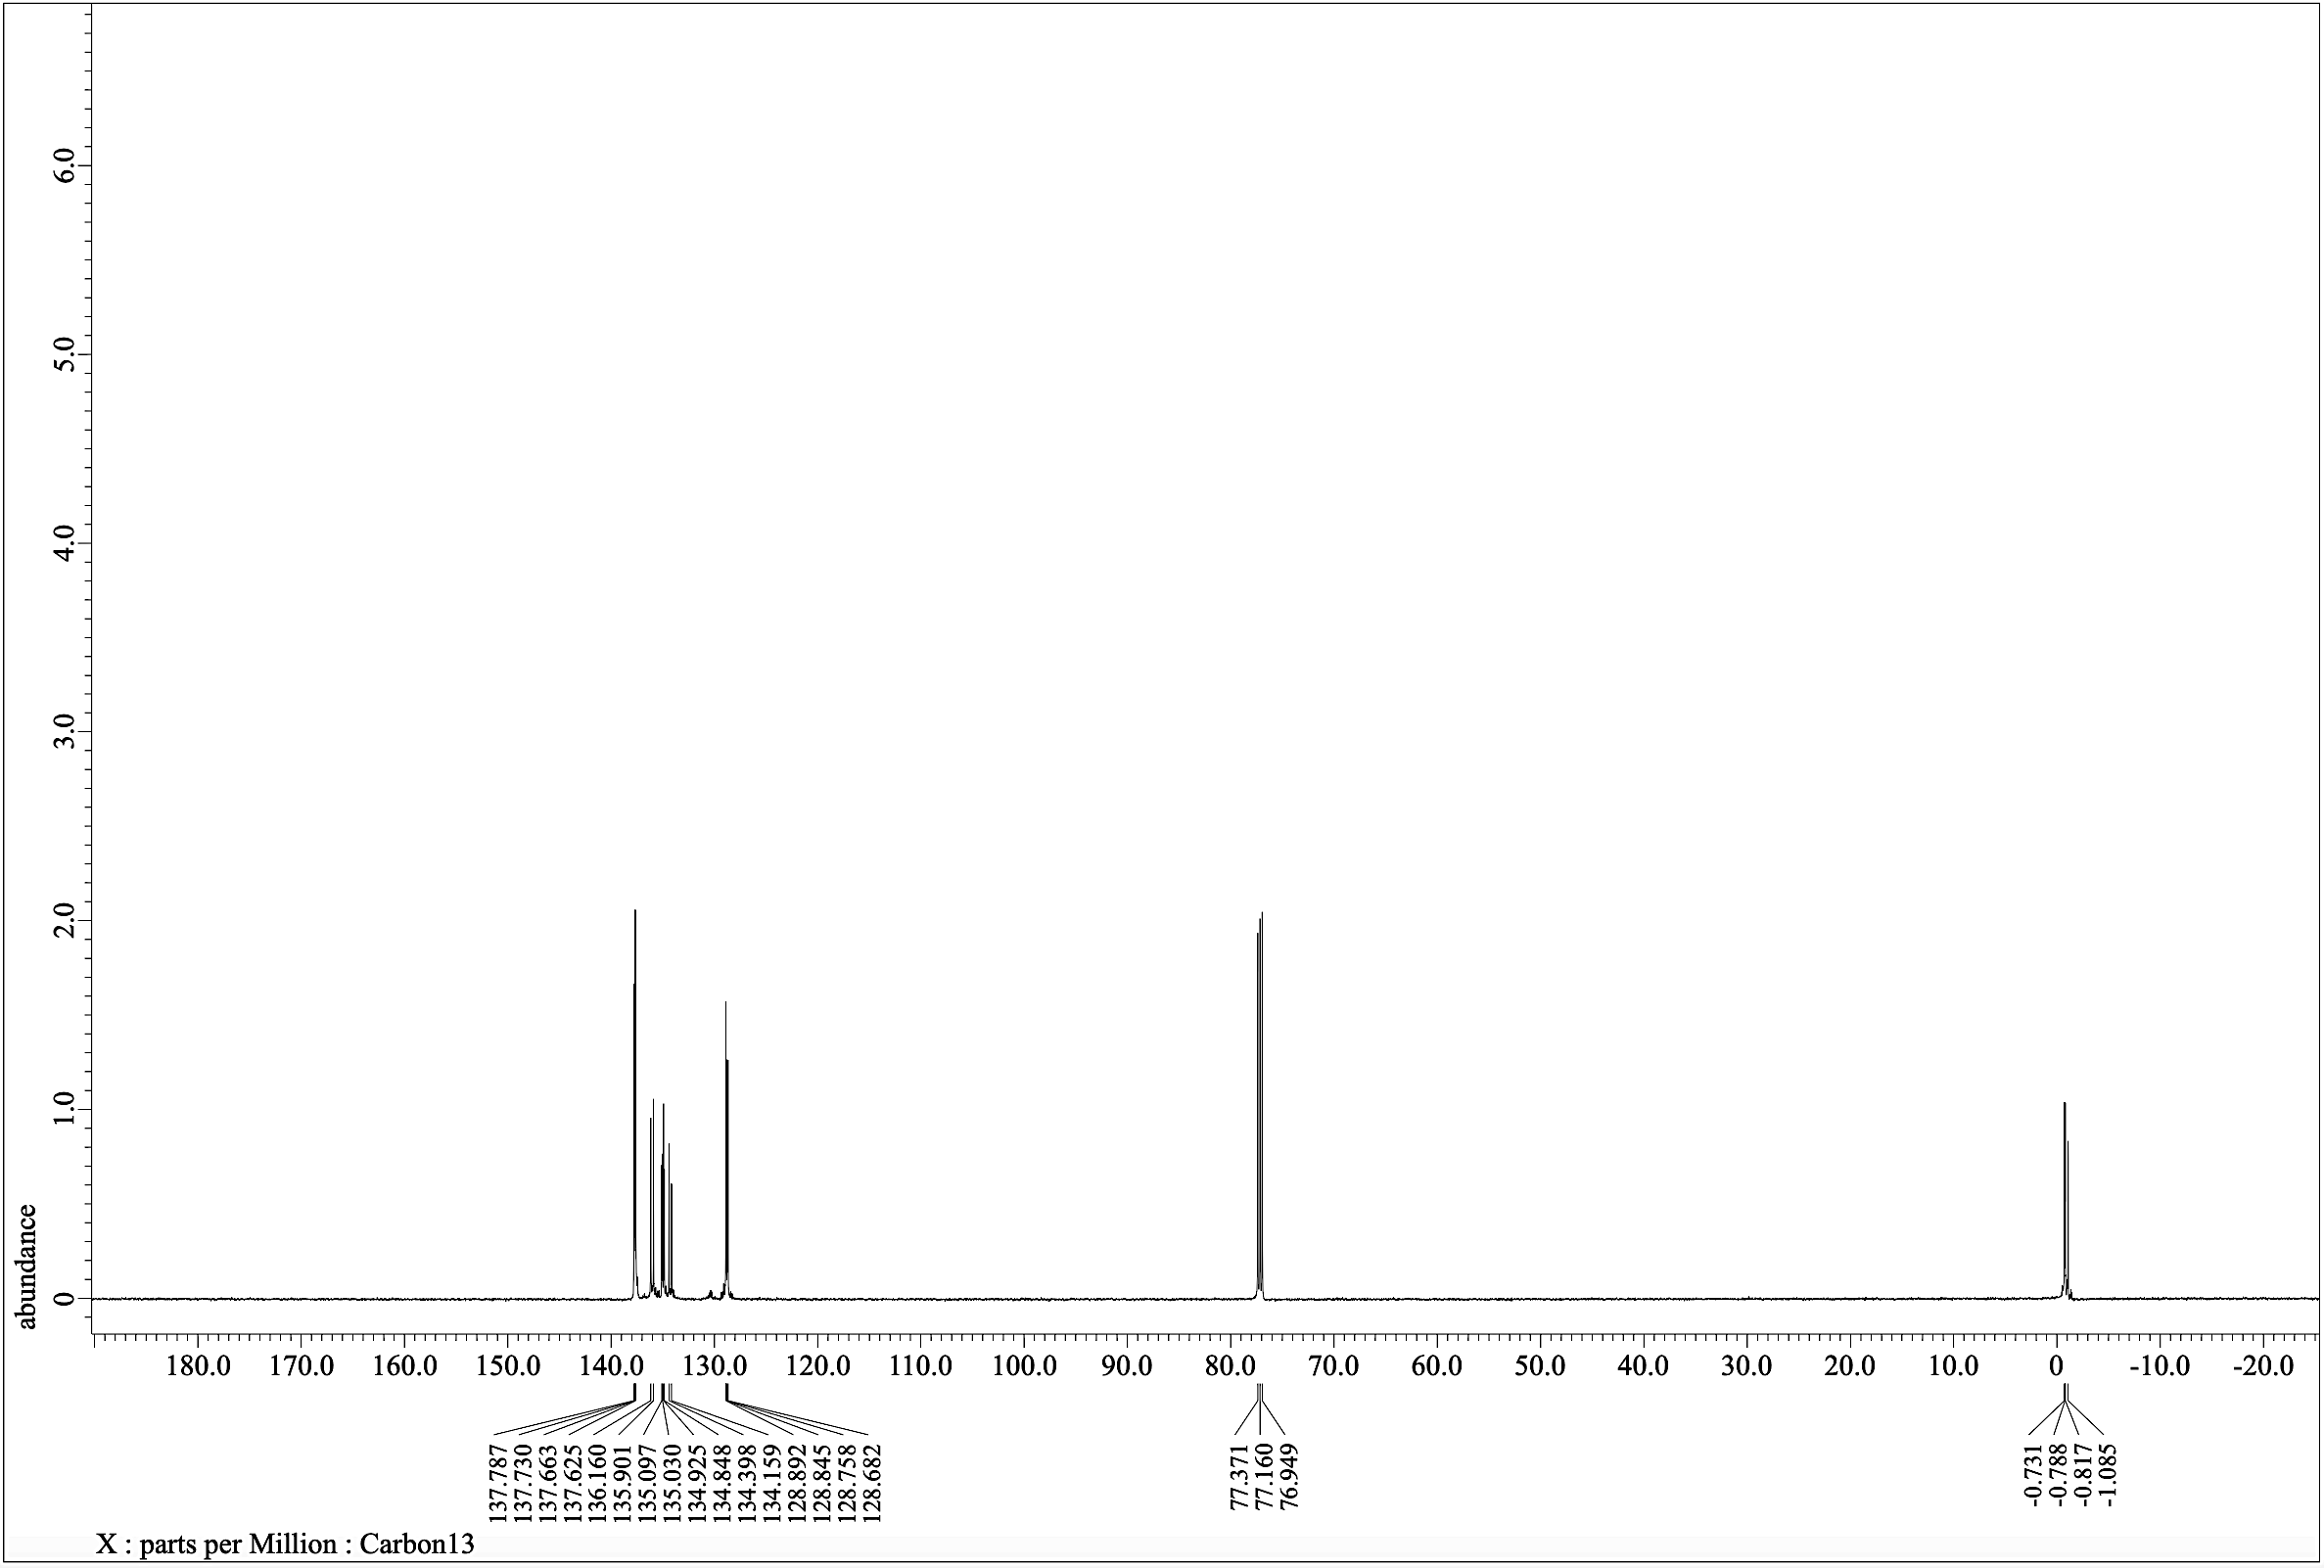


13C NMR (150.91 MHz, CDCl3)

**8**

**Figure S8: 13**C NMR spectrum for **8**.

**
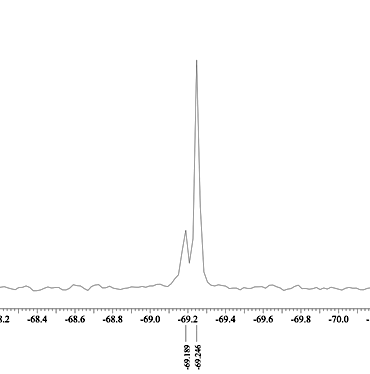

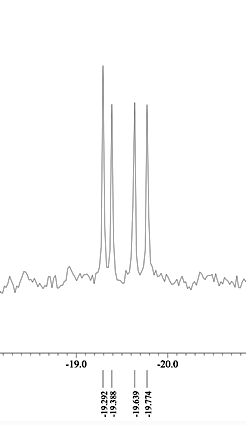

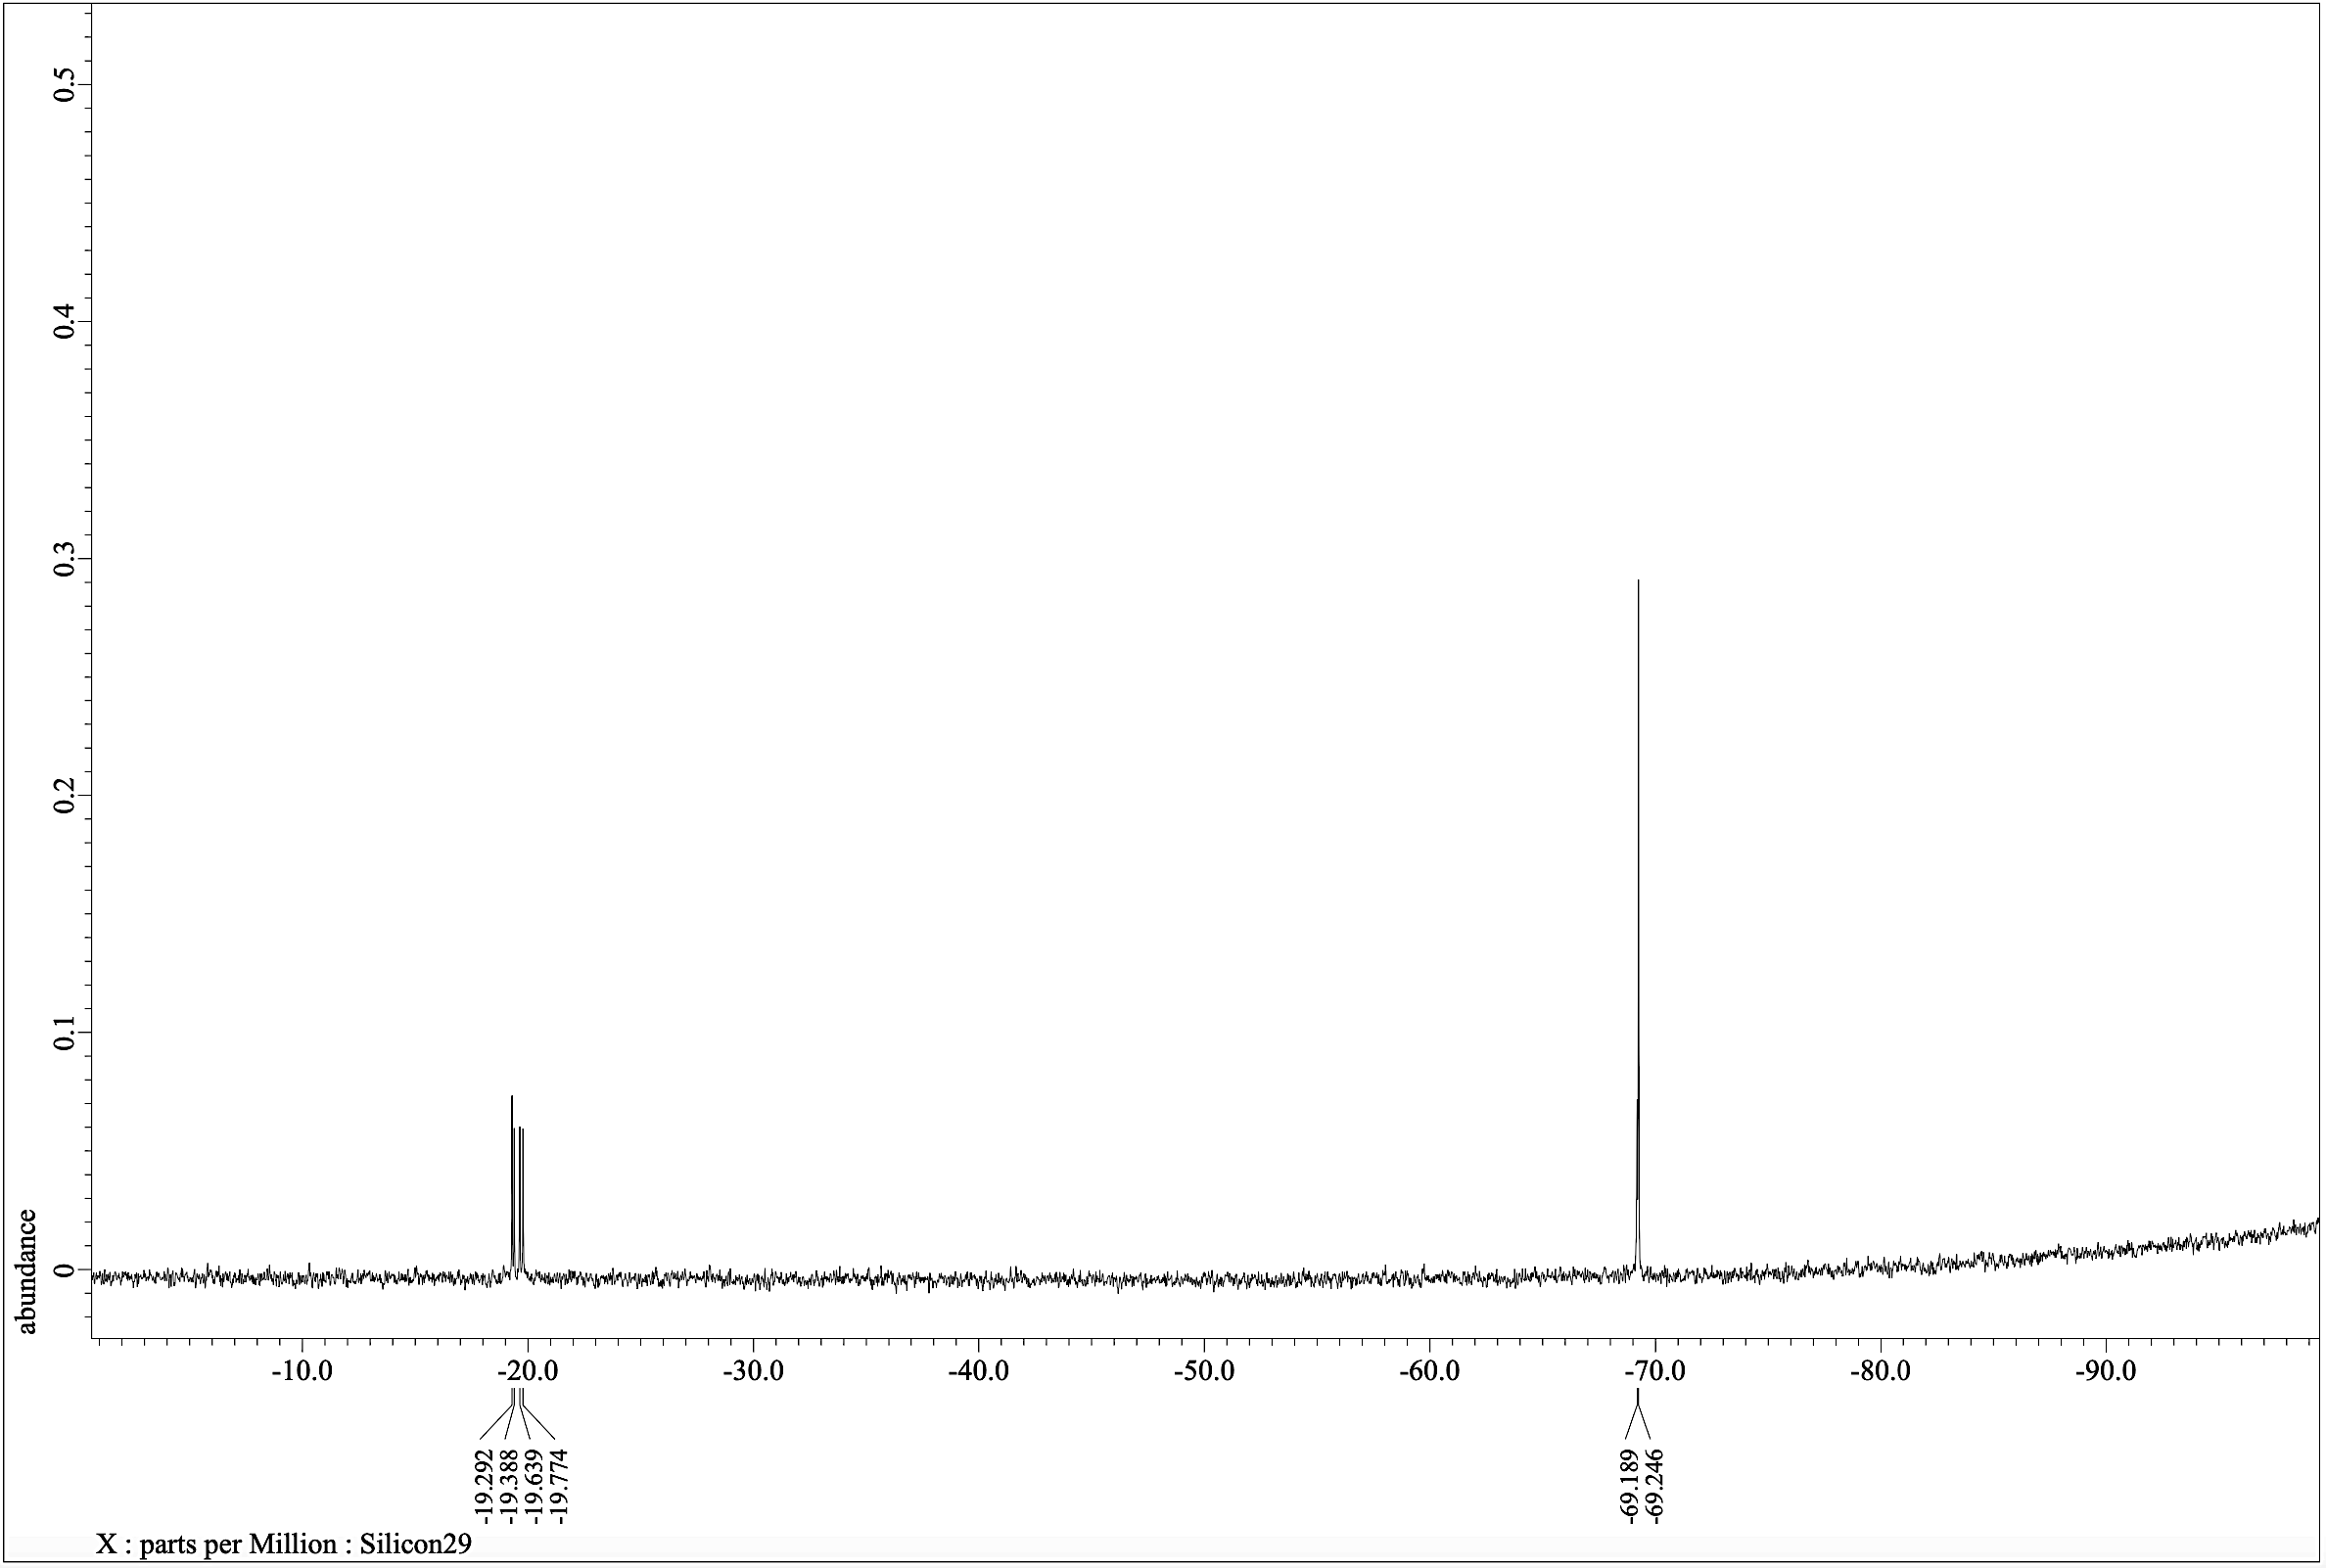
**

**8**

**-Si-**

**-Si-**

29Si NMR (119.24 MHz, CDCl3)

**Figure S9: 29**Si NMR spectrum for **8**.

**
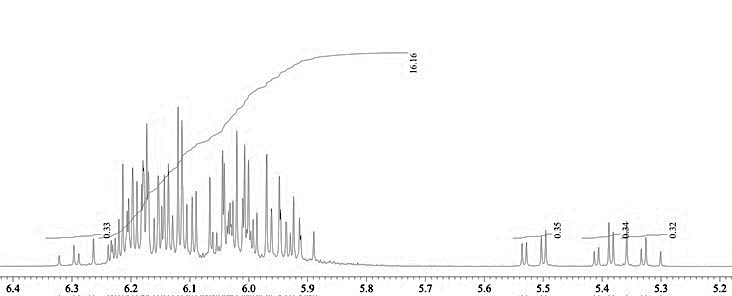

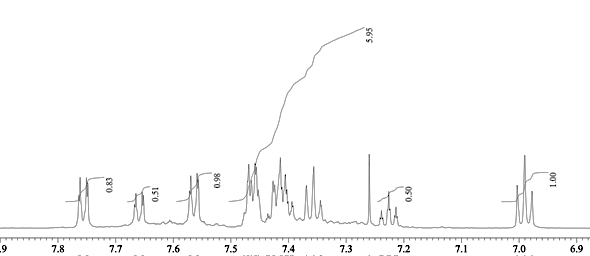

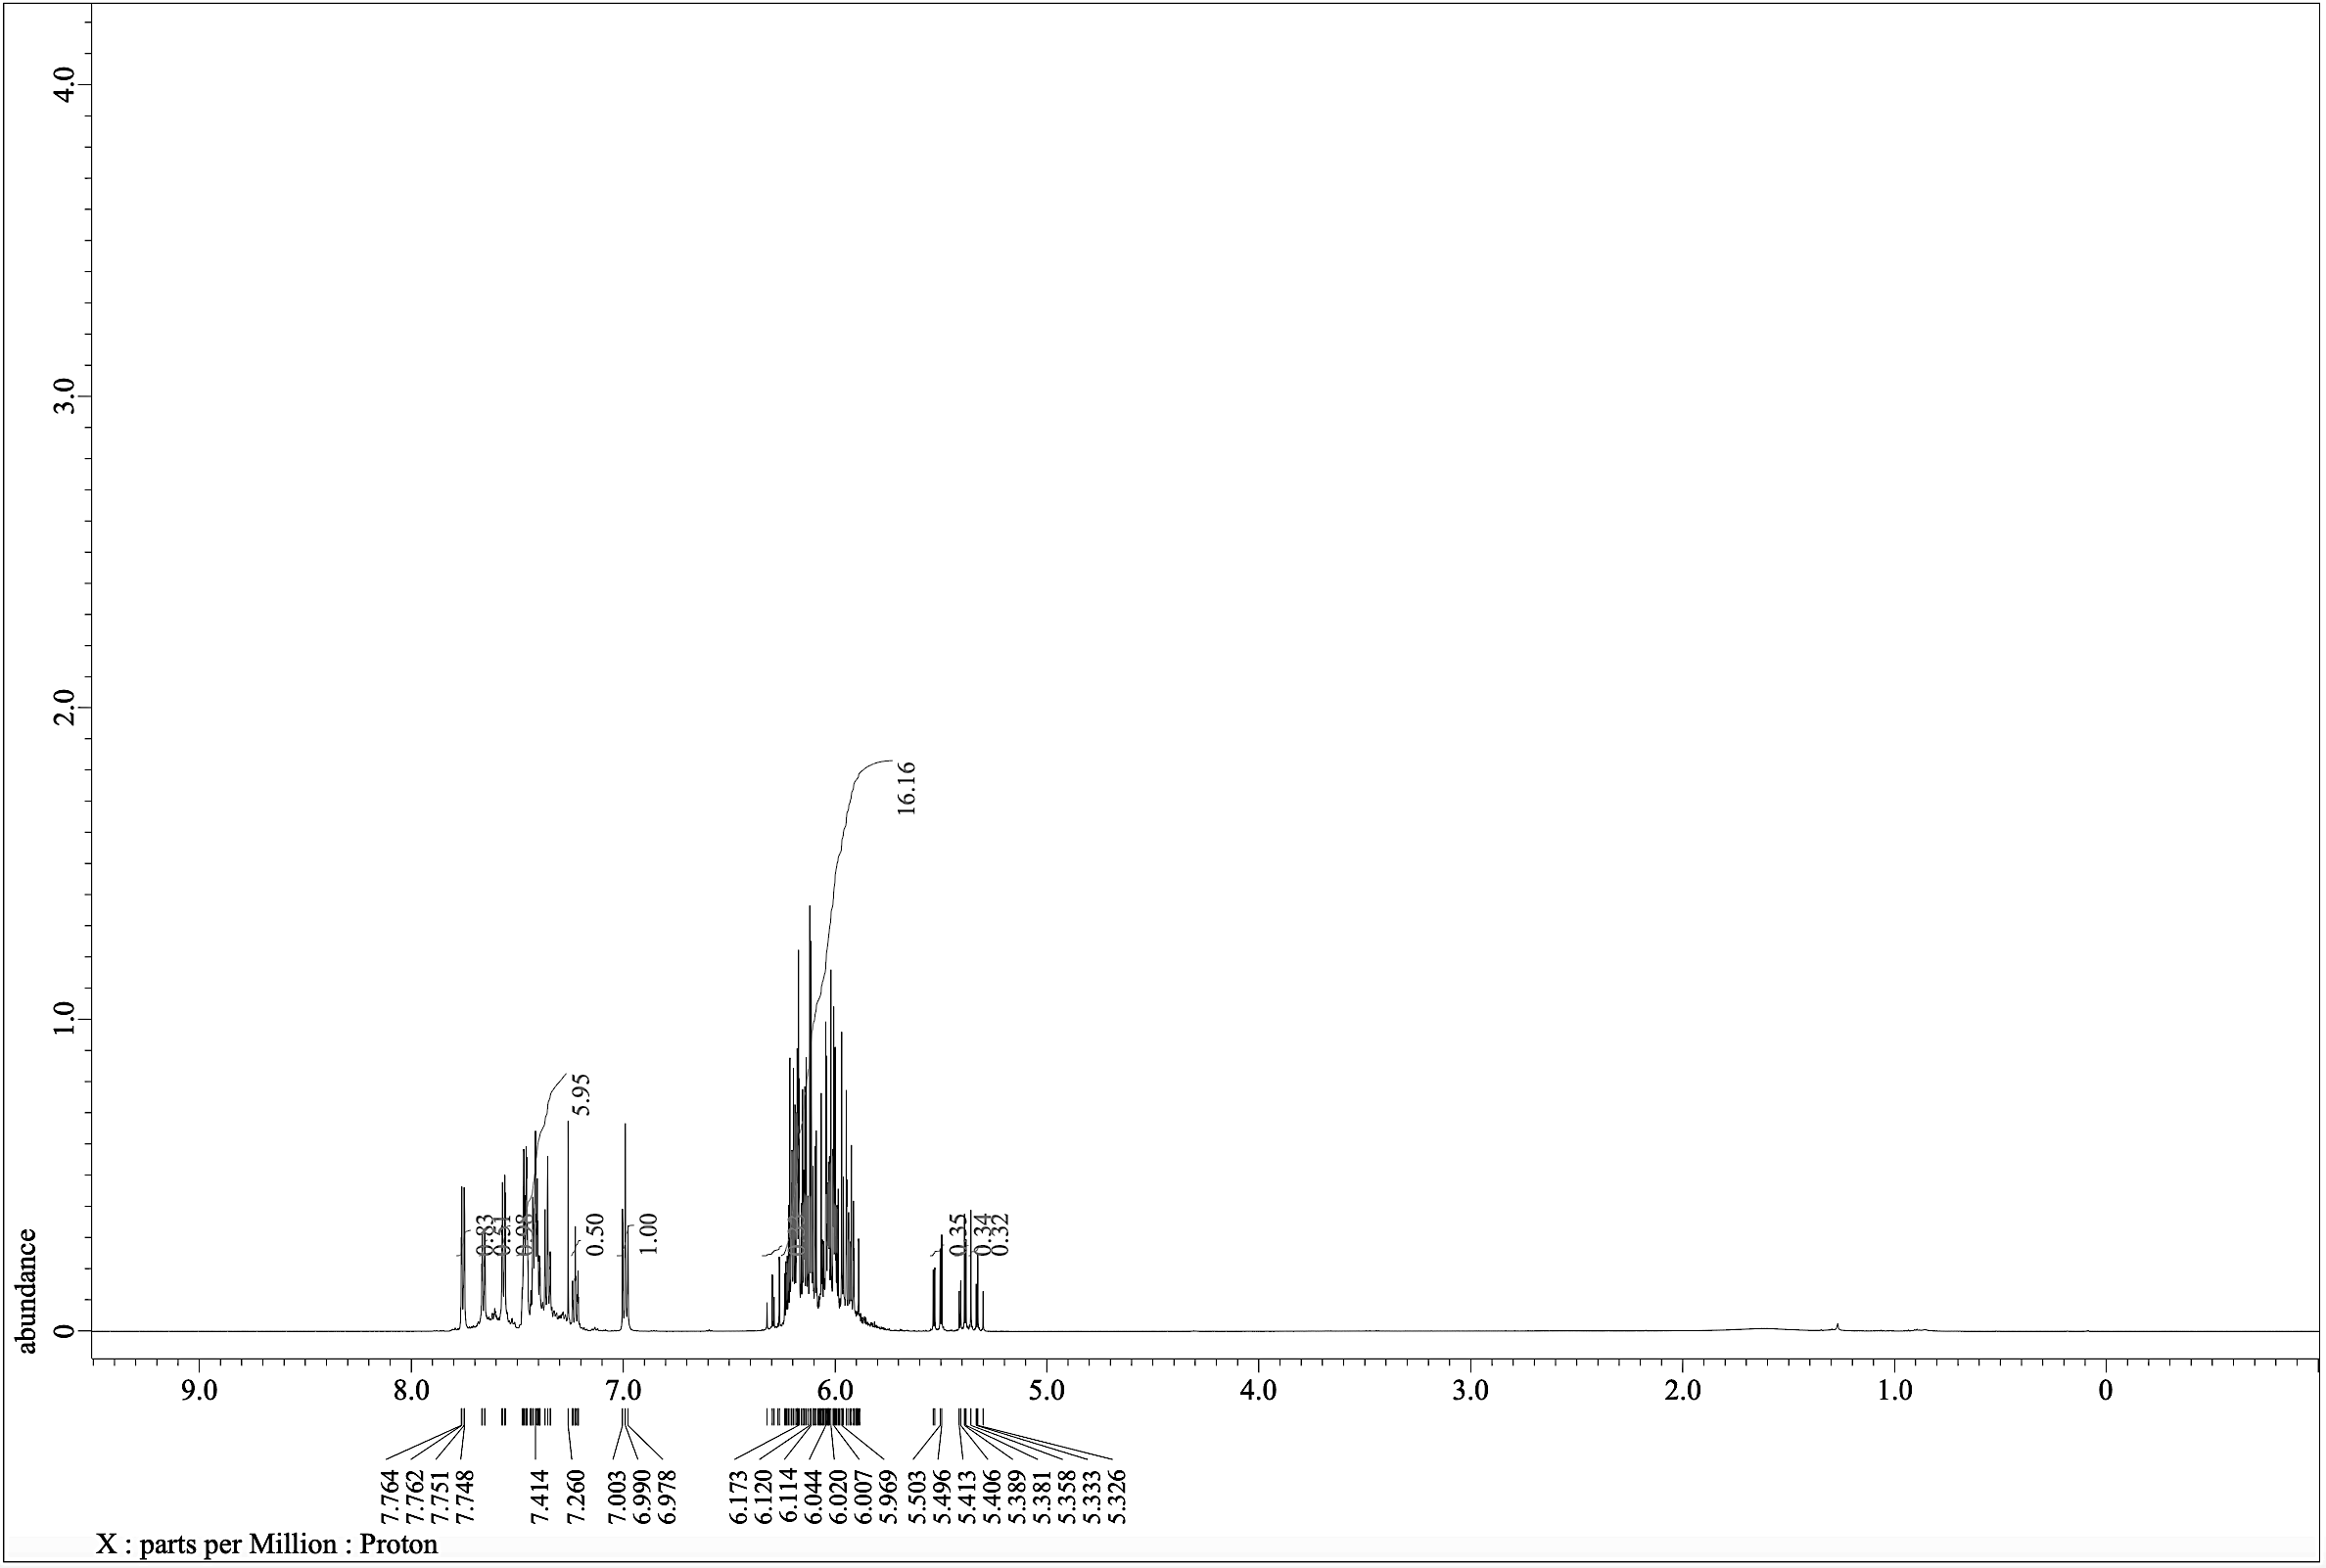
**

**9**

1H NMR (600.17 MHz, CDCl3)

**Figure S10: 1**H NMR spectrum for **9**.

**
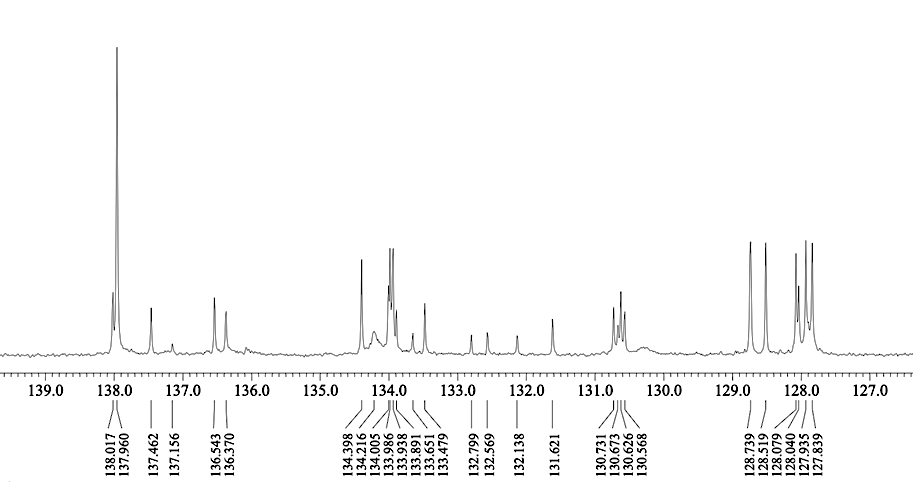

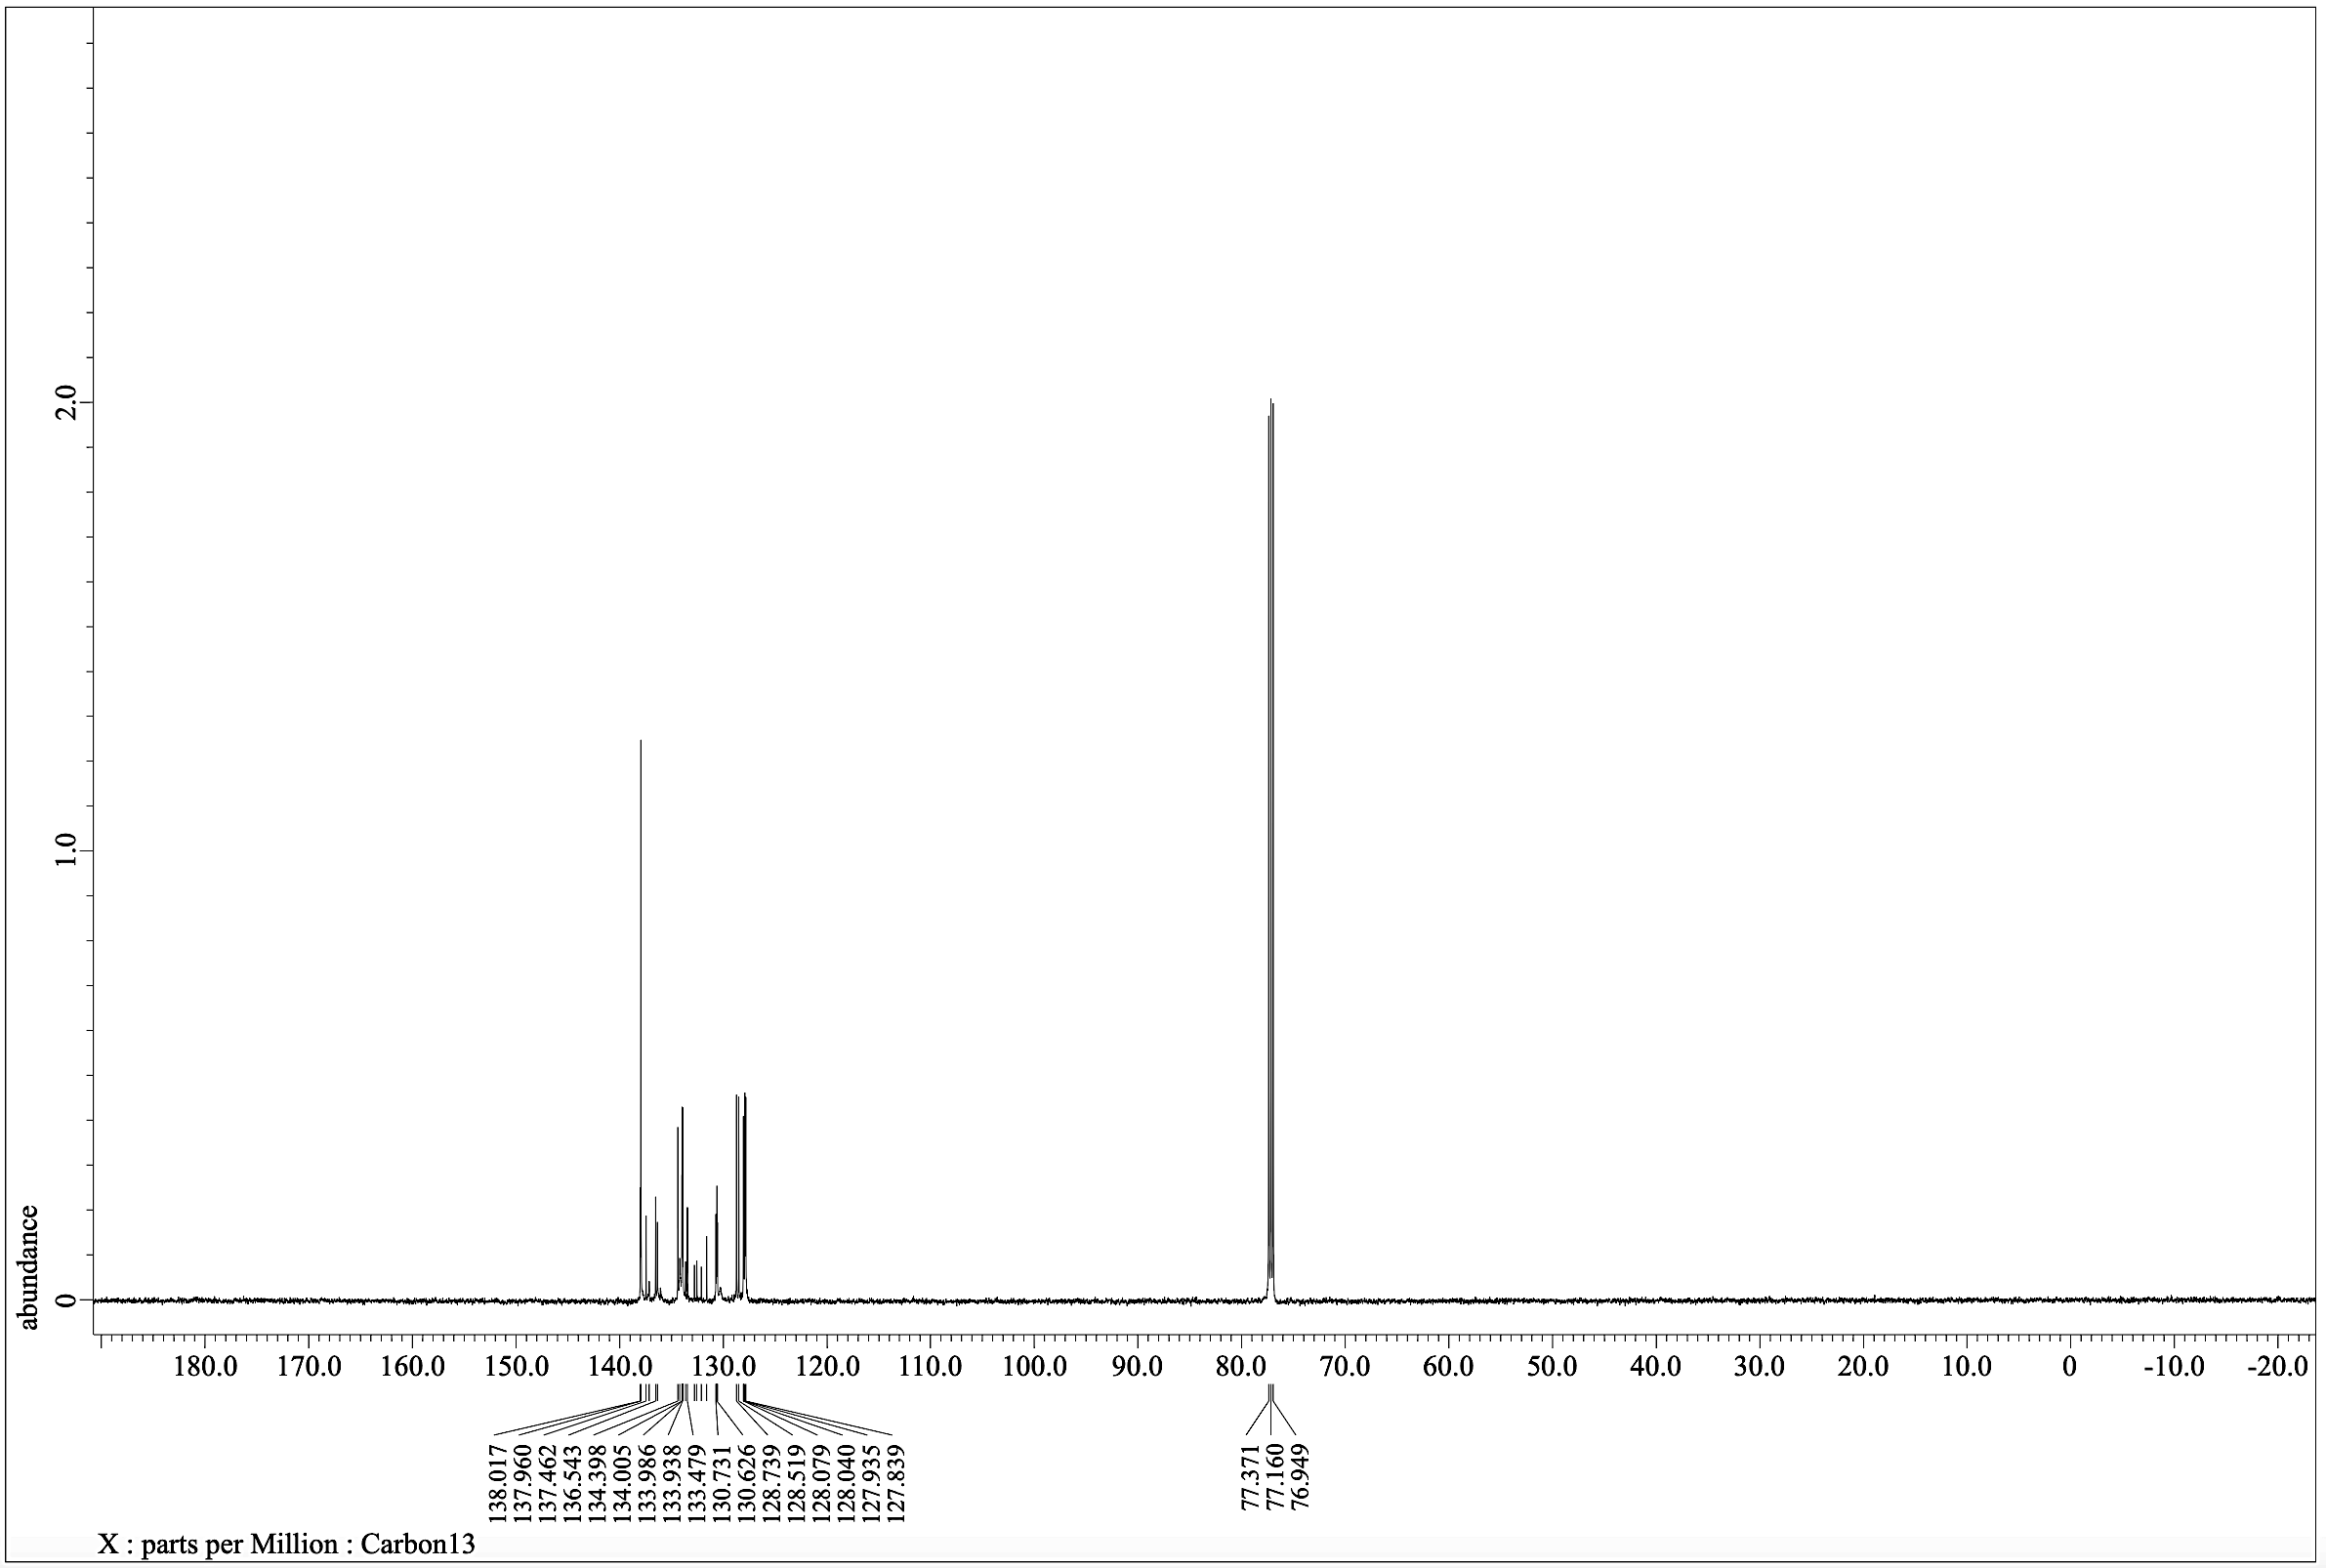
**

**9**

13C NMR (150.91 MHz, CDCl3)

**Figure S11: 13**C NMR spectrum for **9**.

**
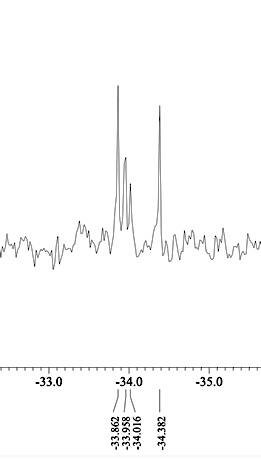

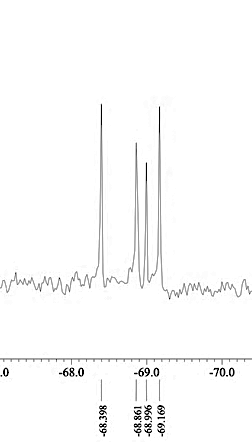

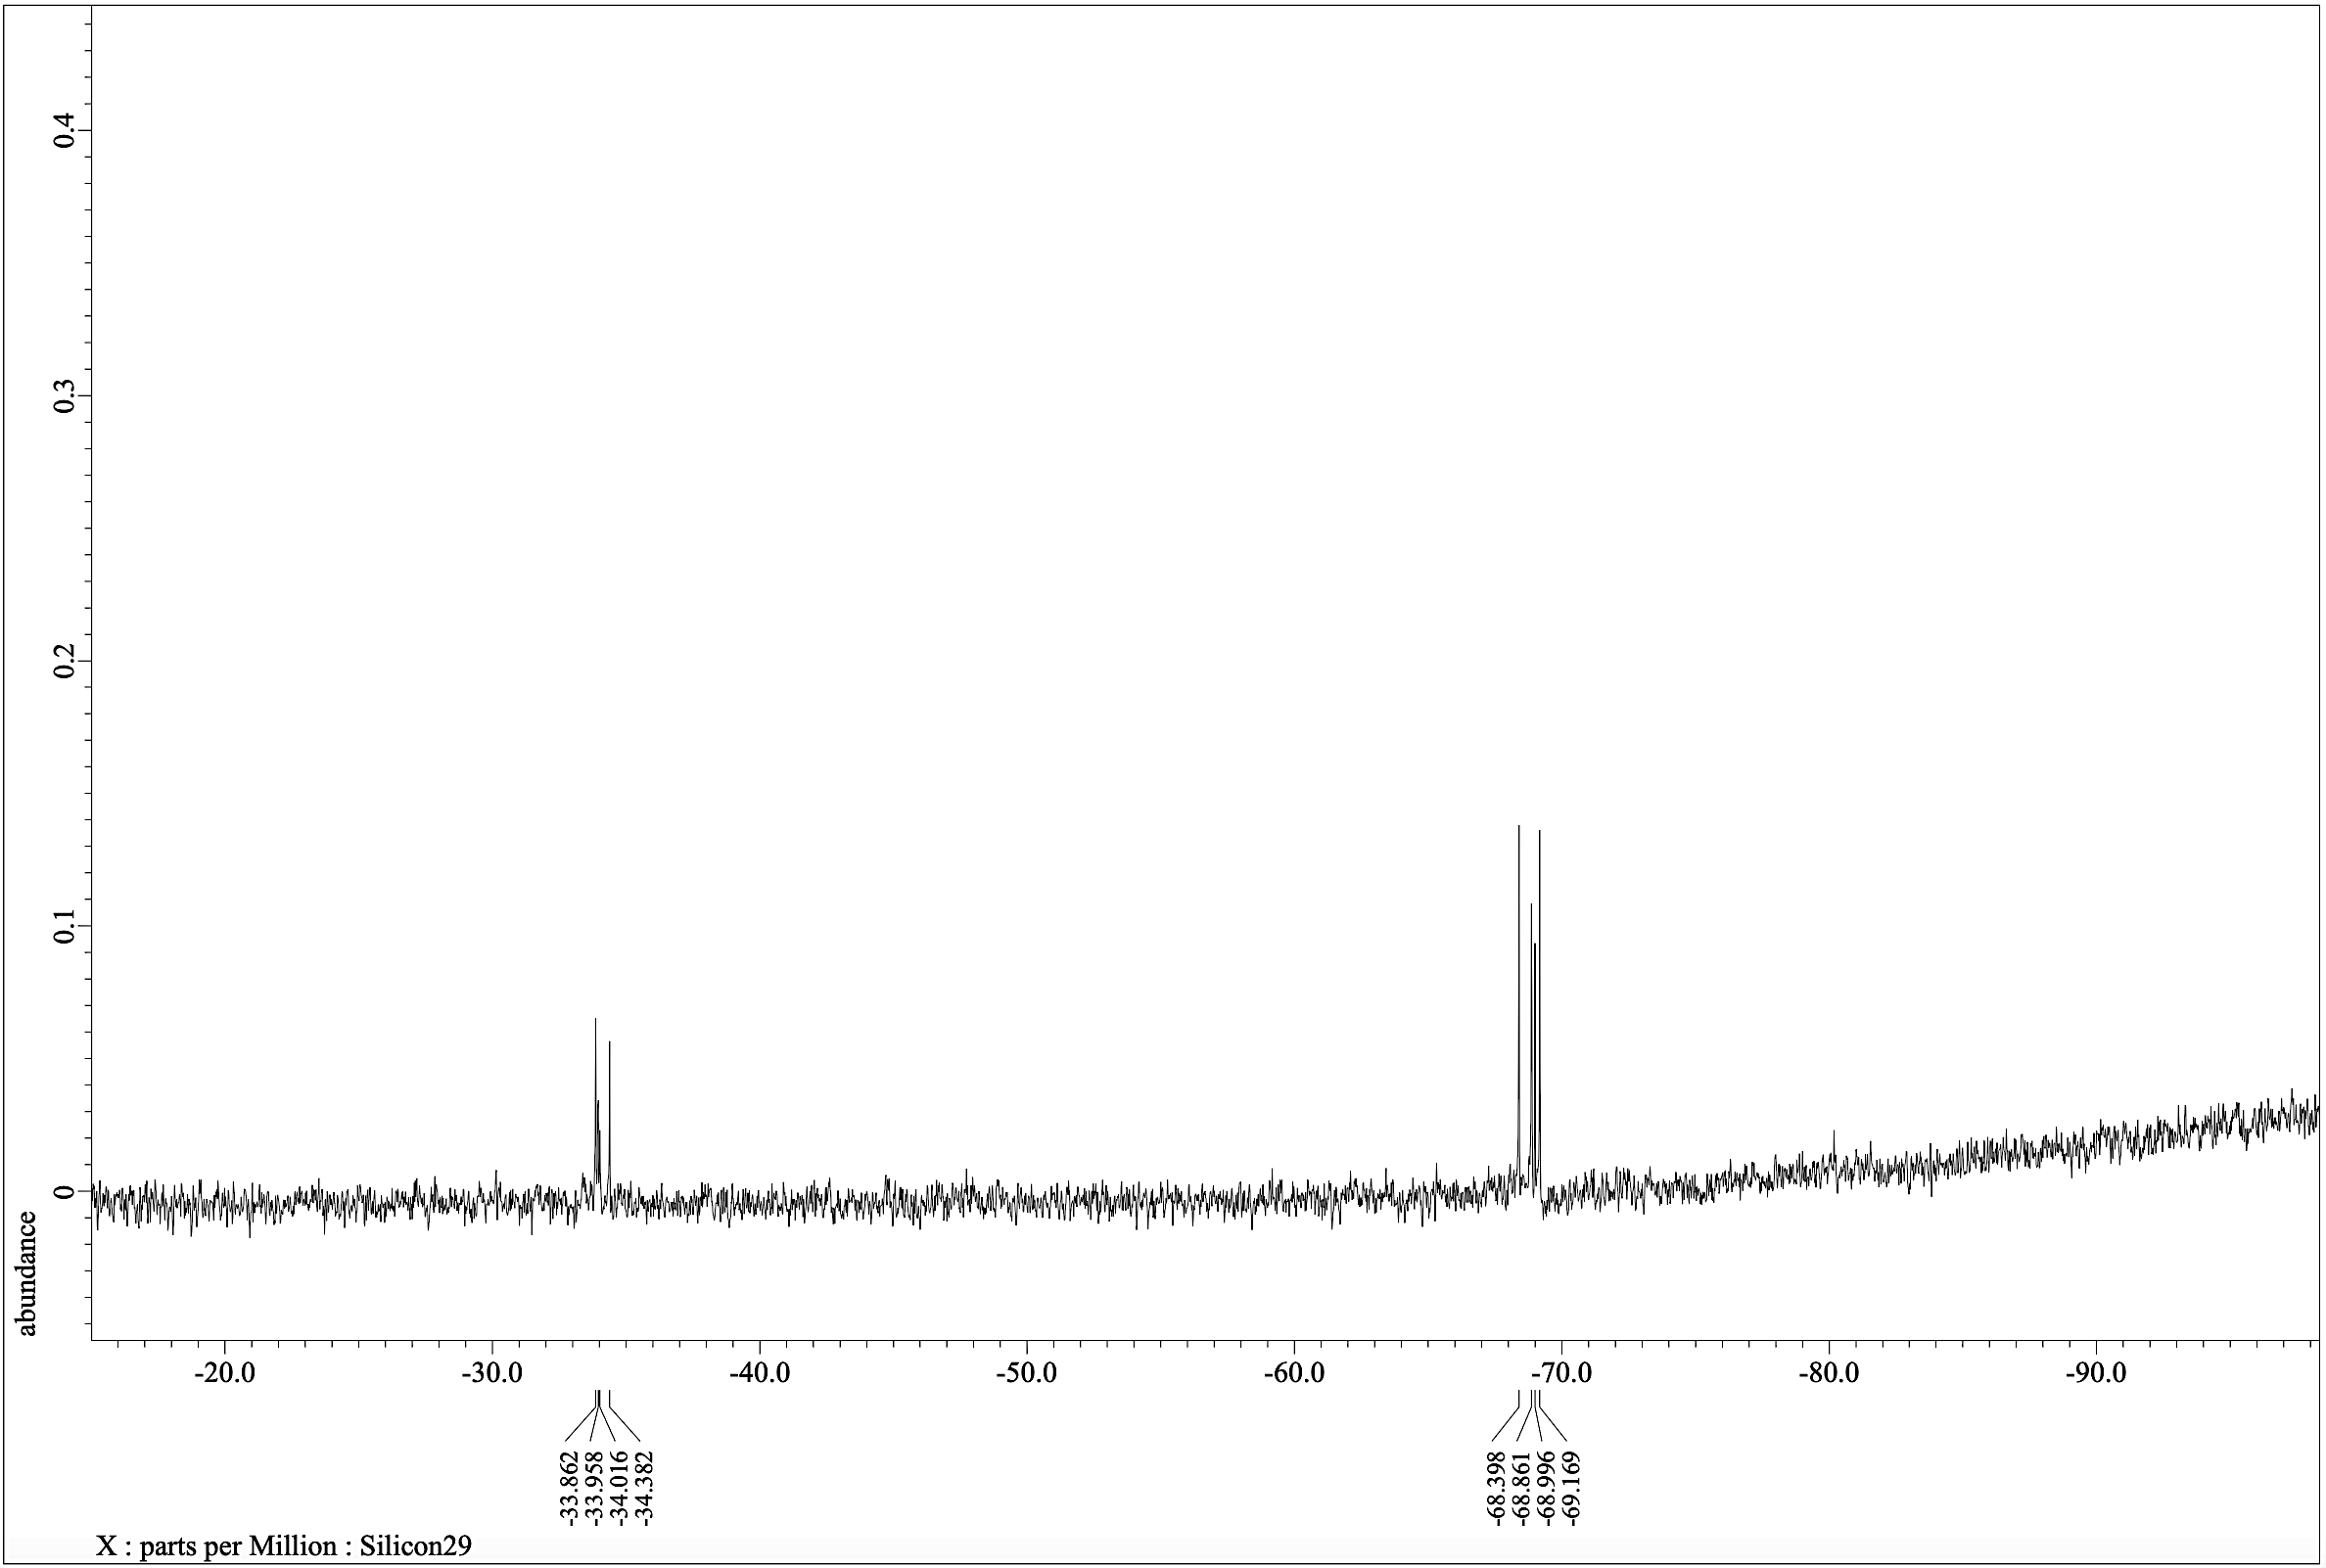
**

29Si NMR (119.24 MHz, CDCl3)

**-Si-**

**-Si-**

**9**

**Figure S12: 29**Si NMR spectrum for **9**.


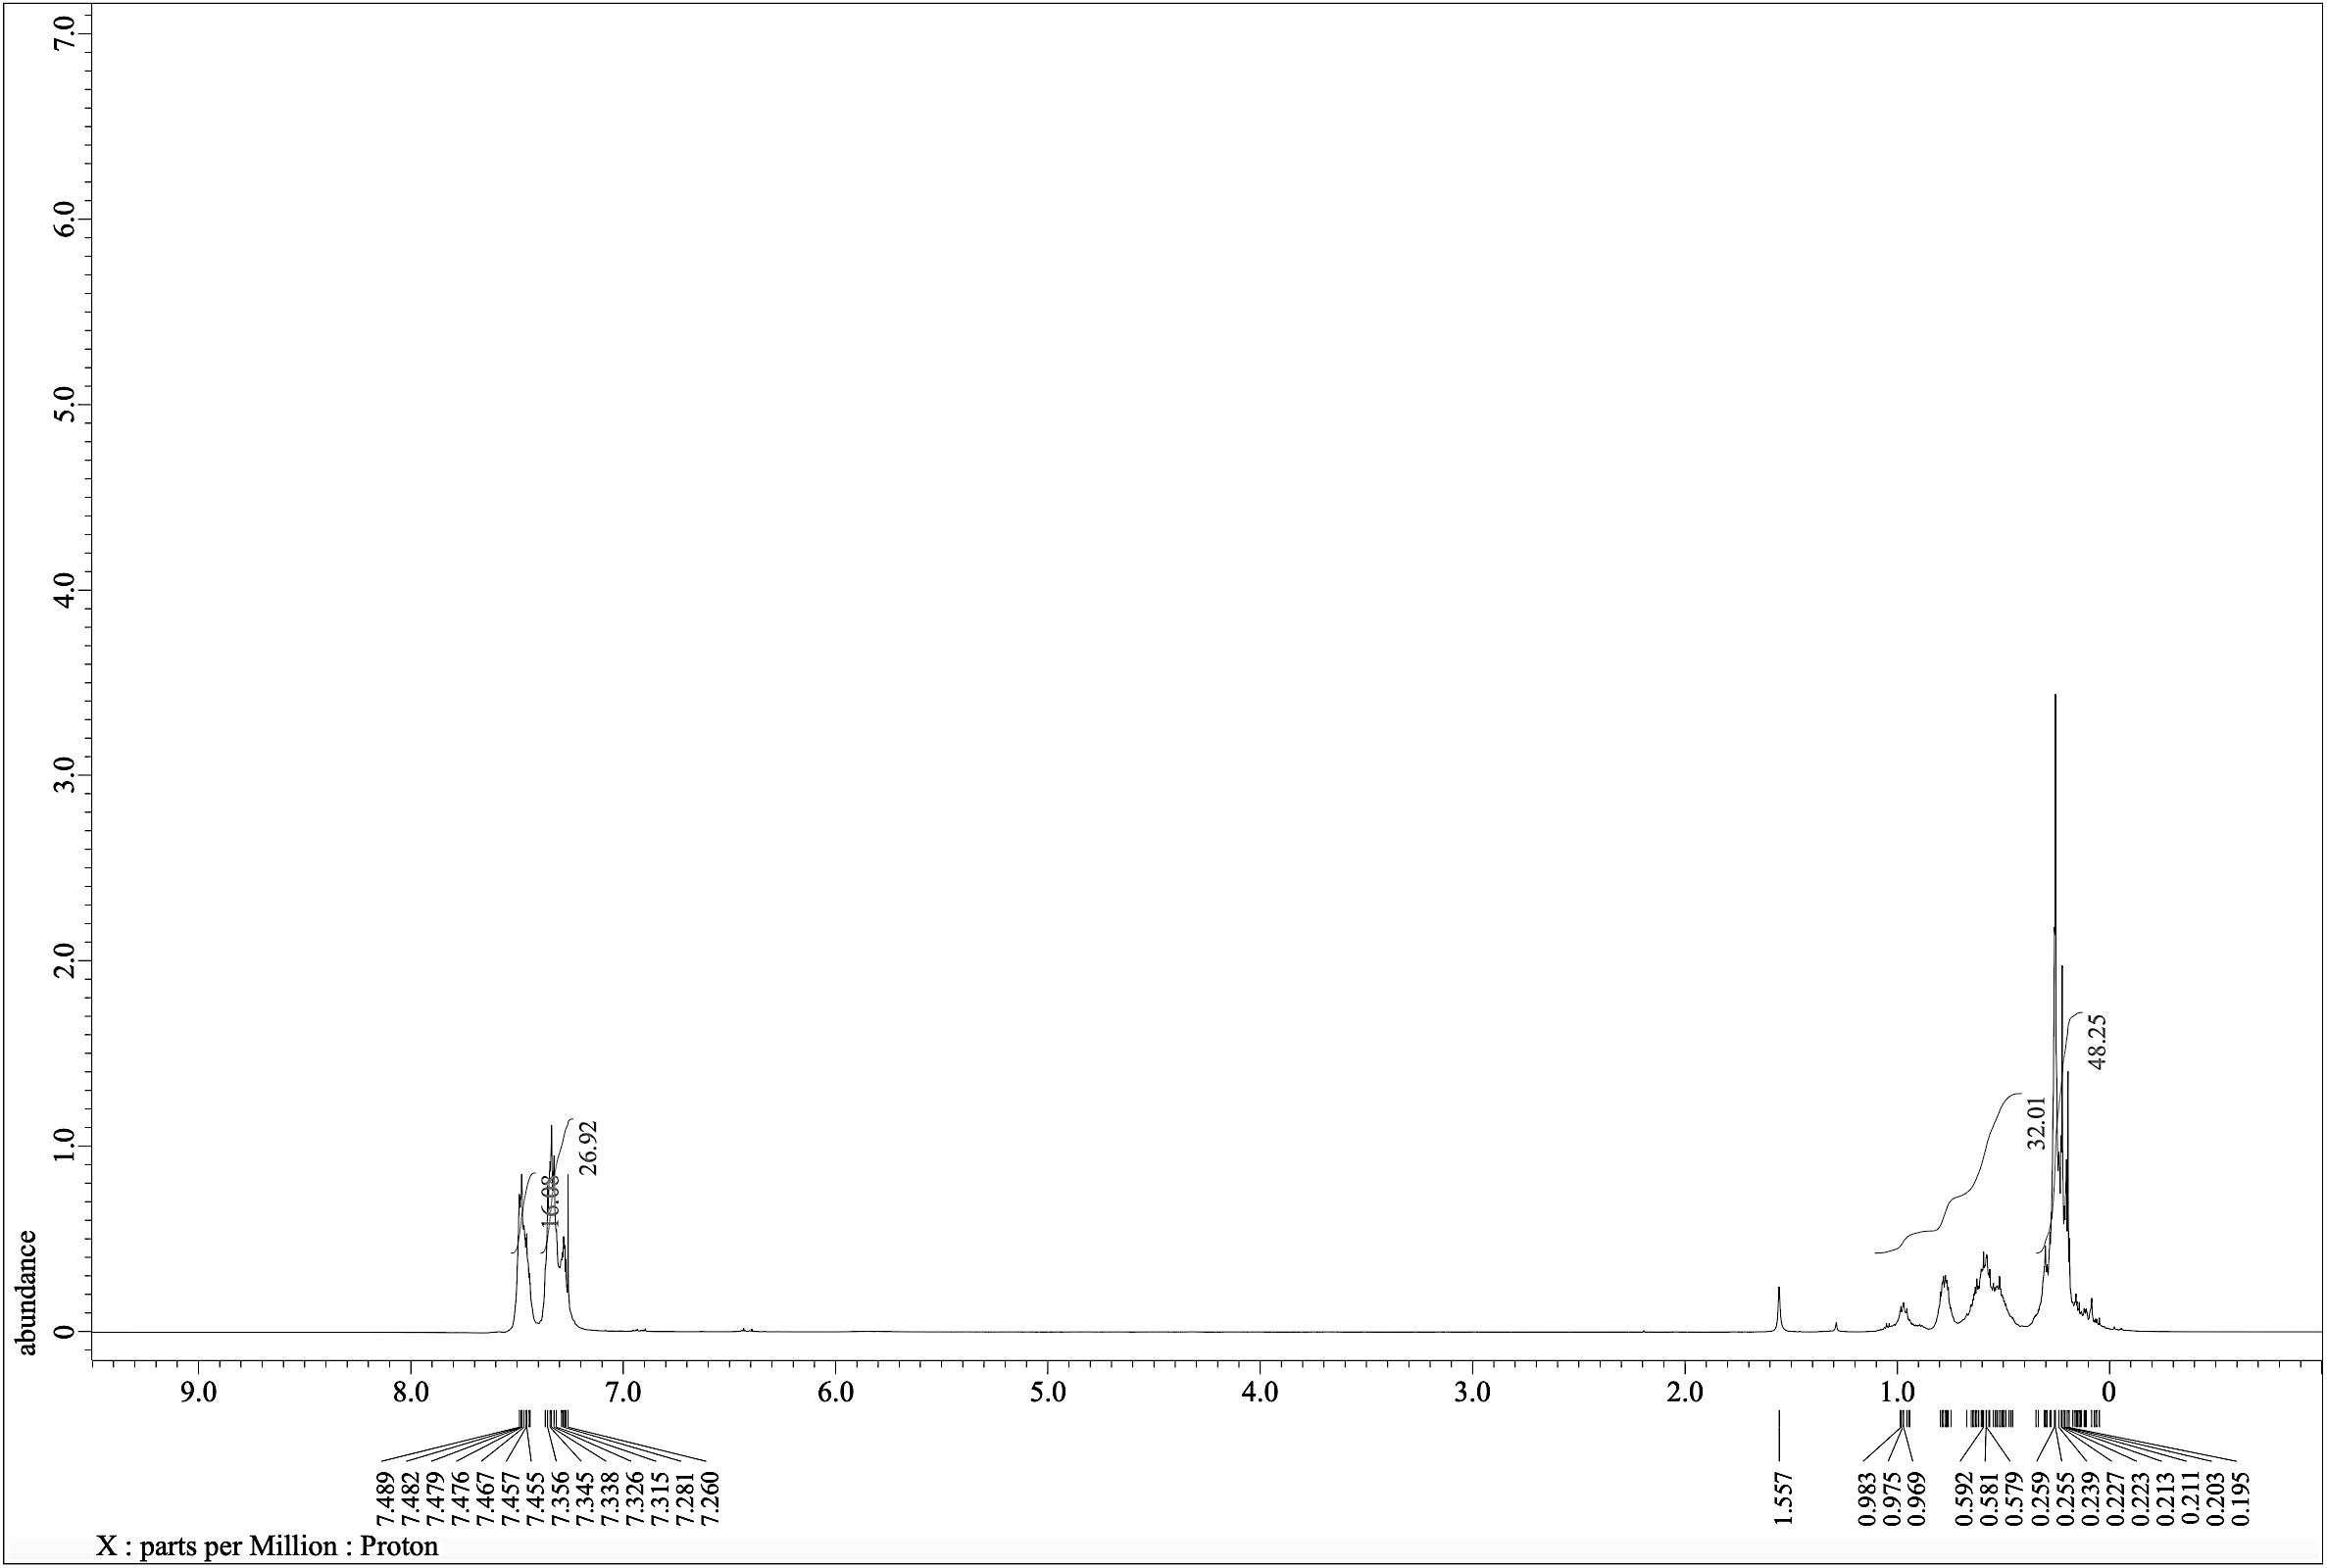


**10**

1H NMR (600.17 MHz, CDCl3)

**Figure S13: 1**H NMR spectrum for **10**.

**
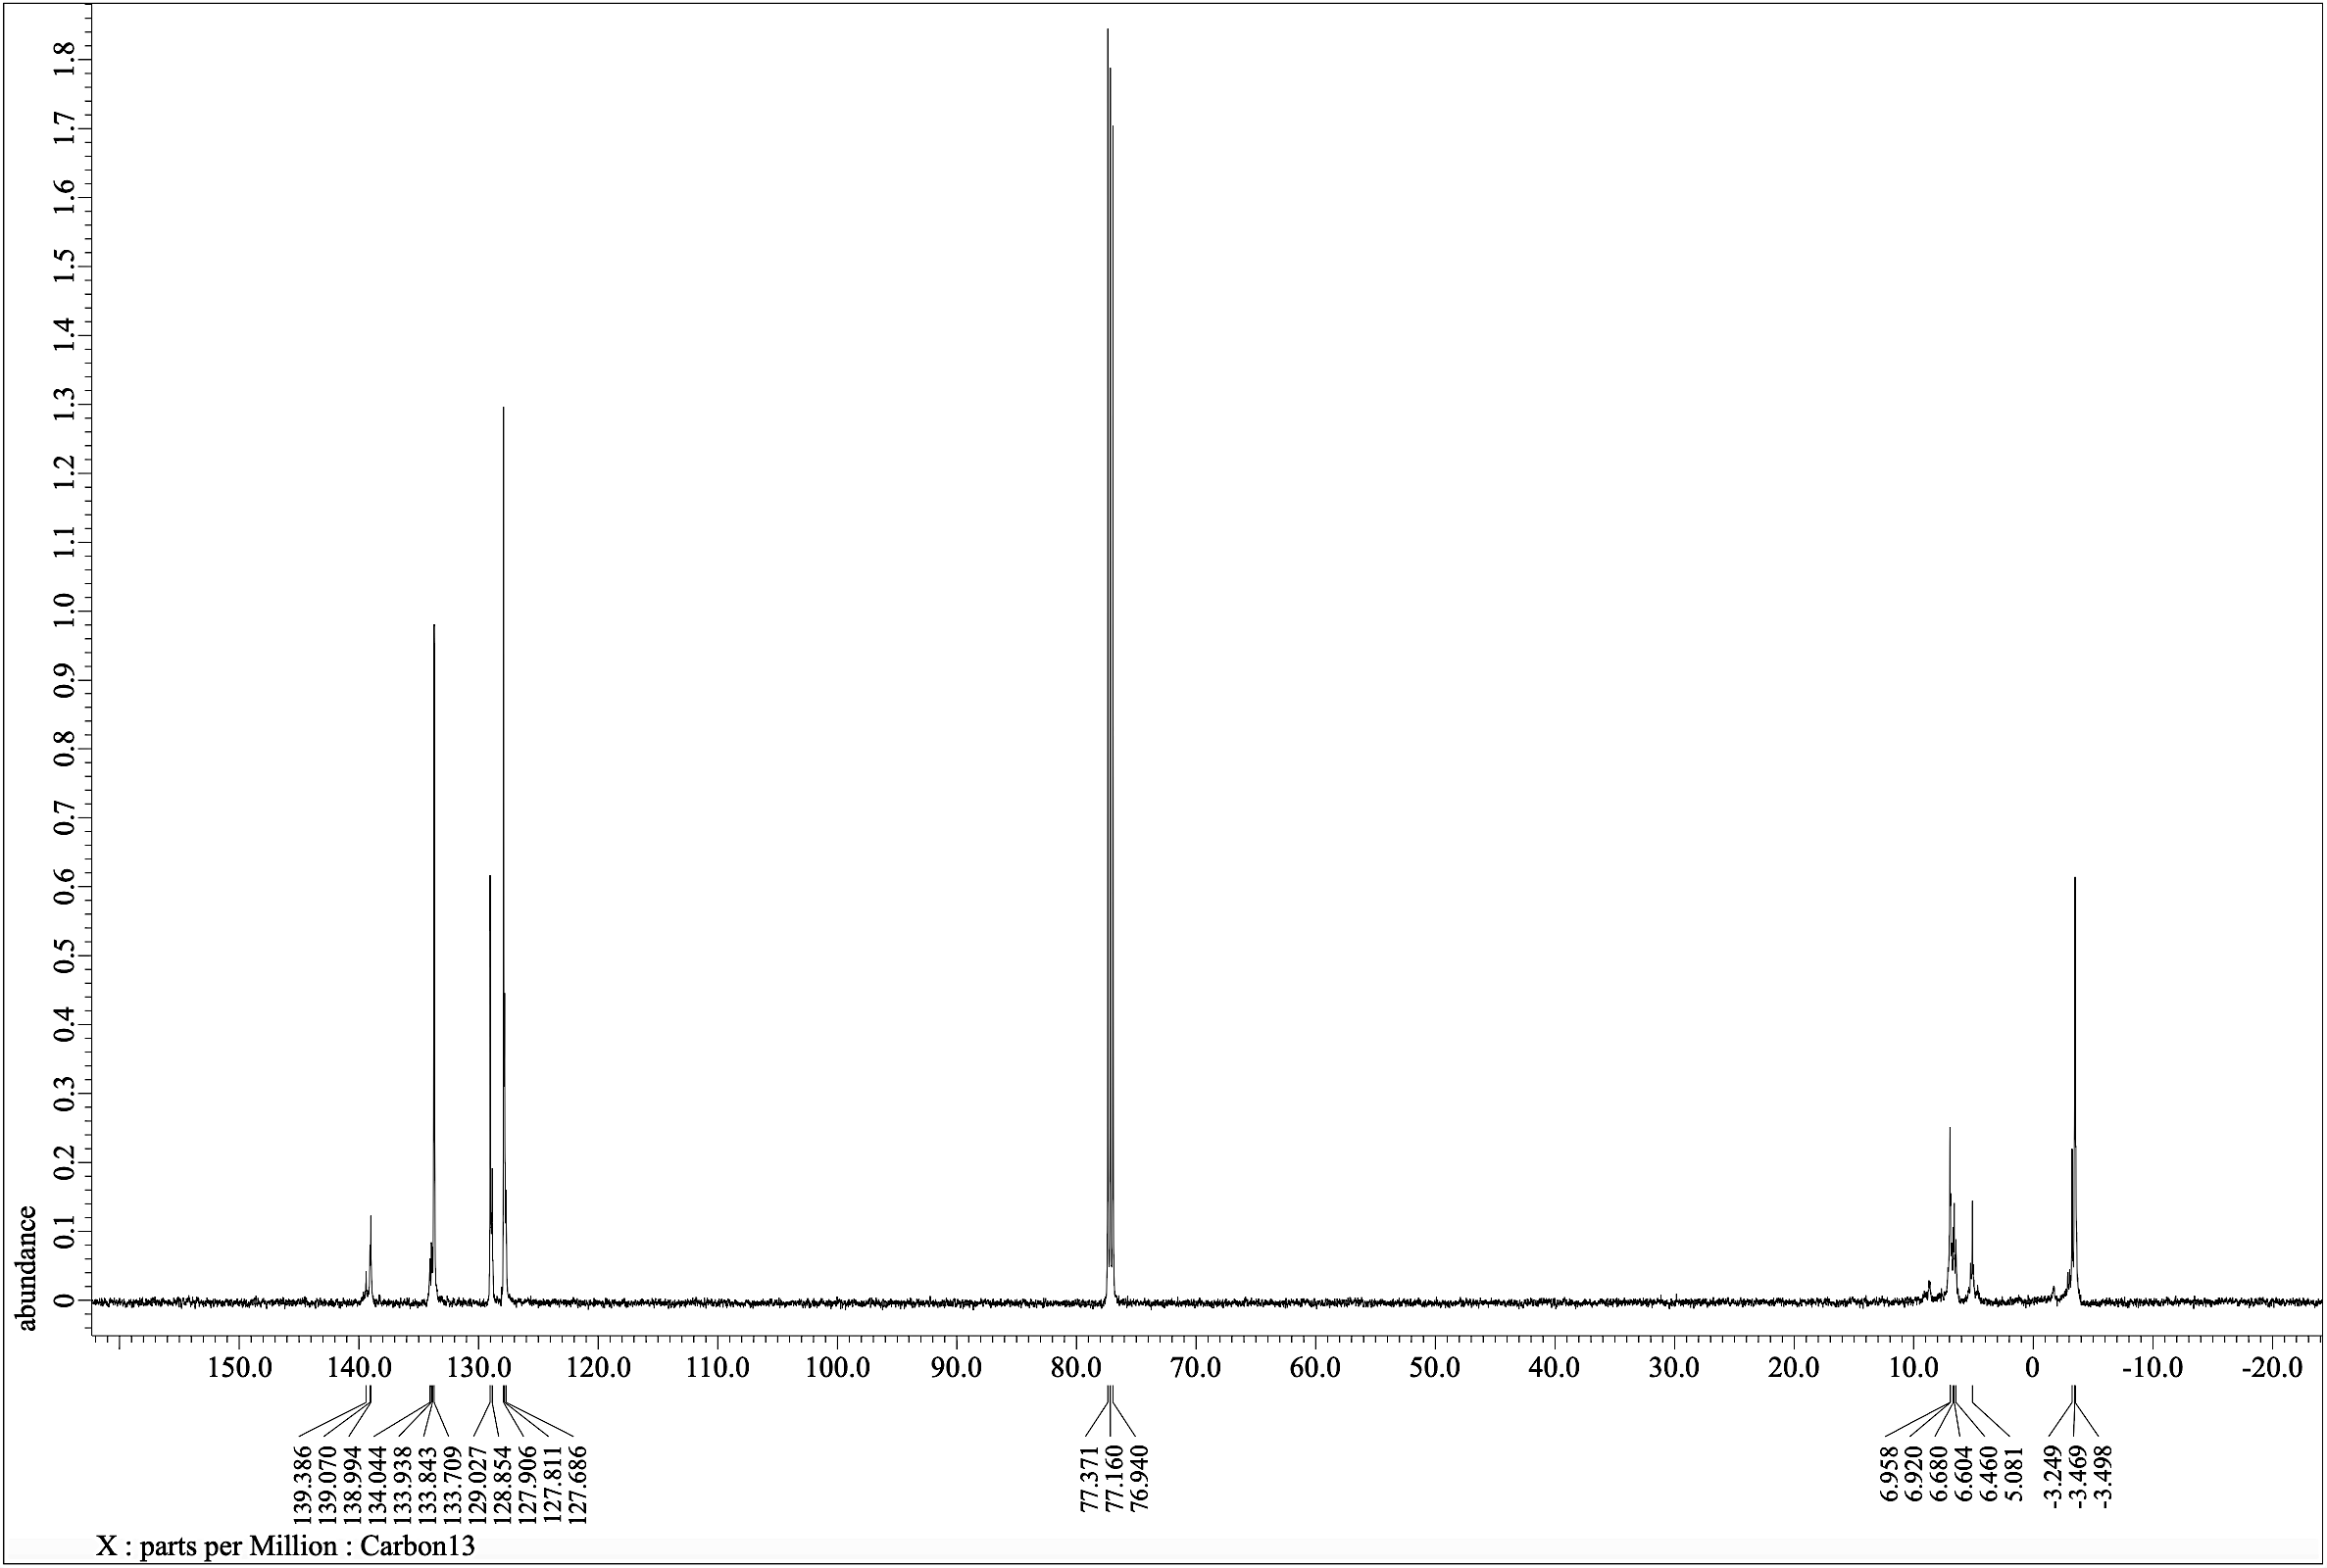
**

13C NMR (150.91 MHz, CDCl3)

**10**

**Figure S14: 13**C NMR spectrum for **10**.

**
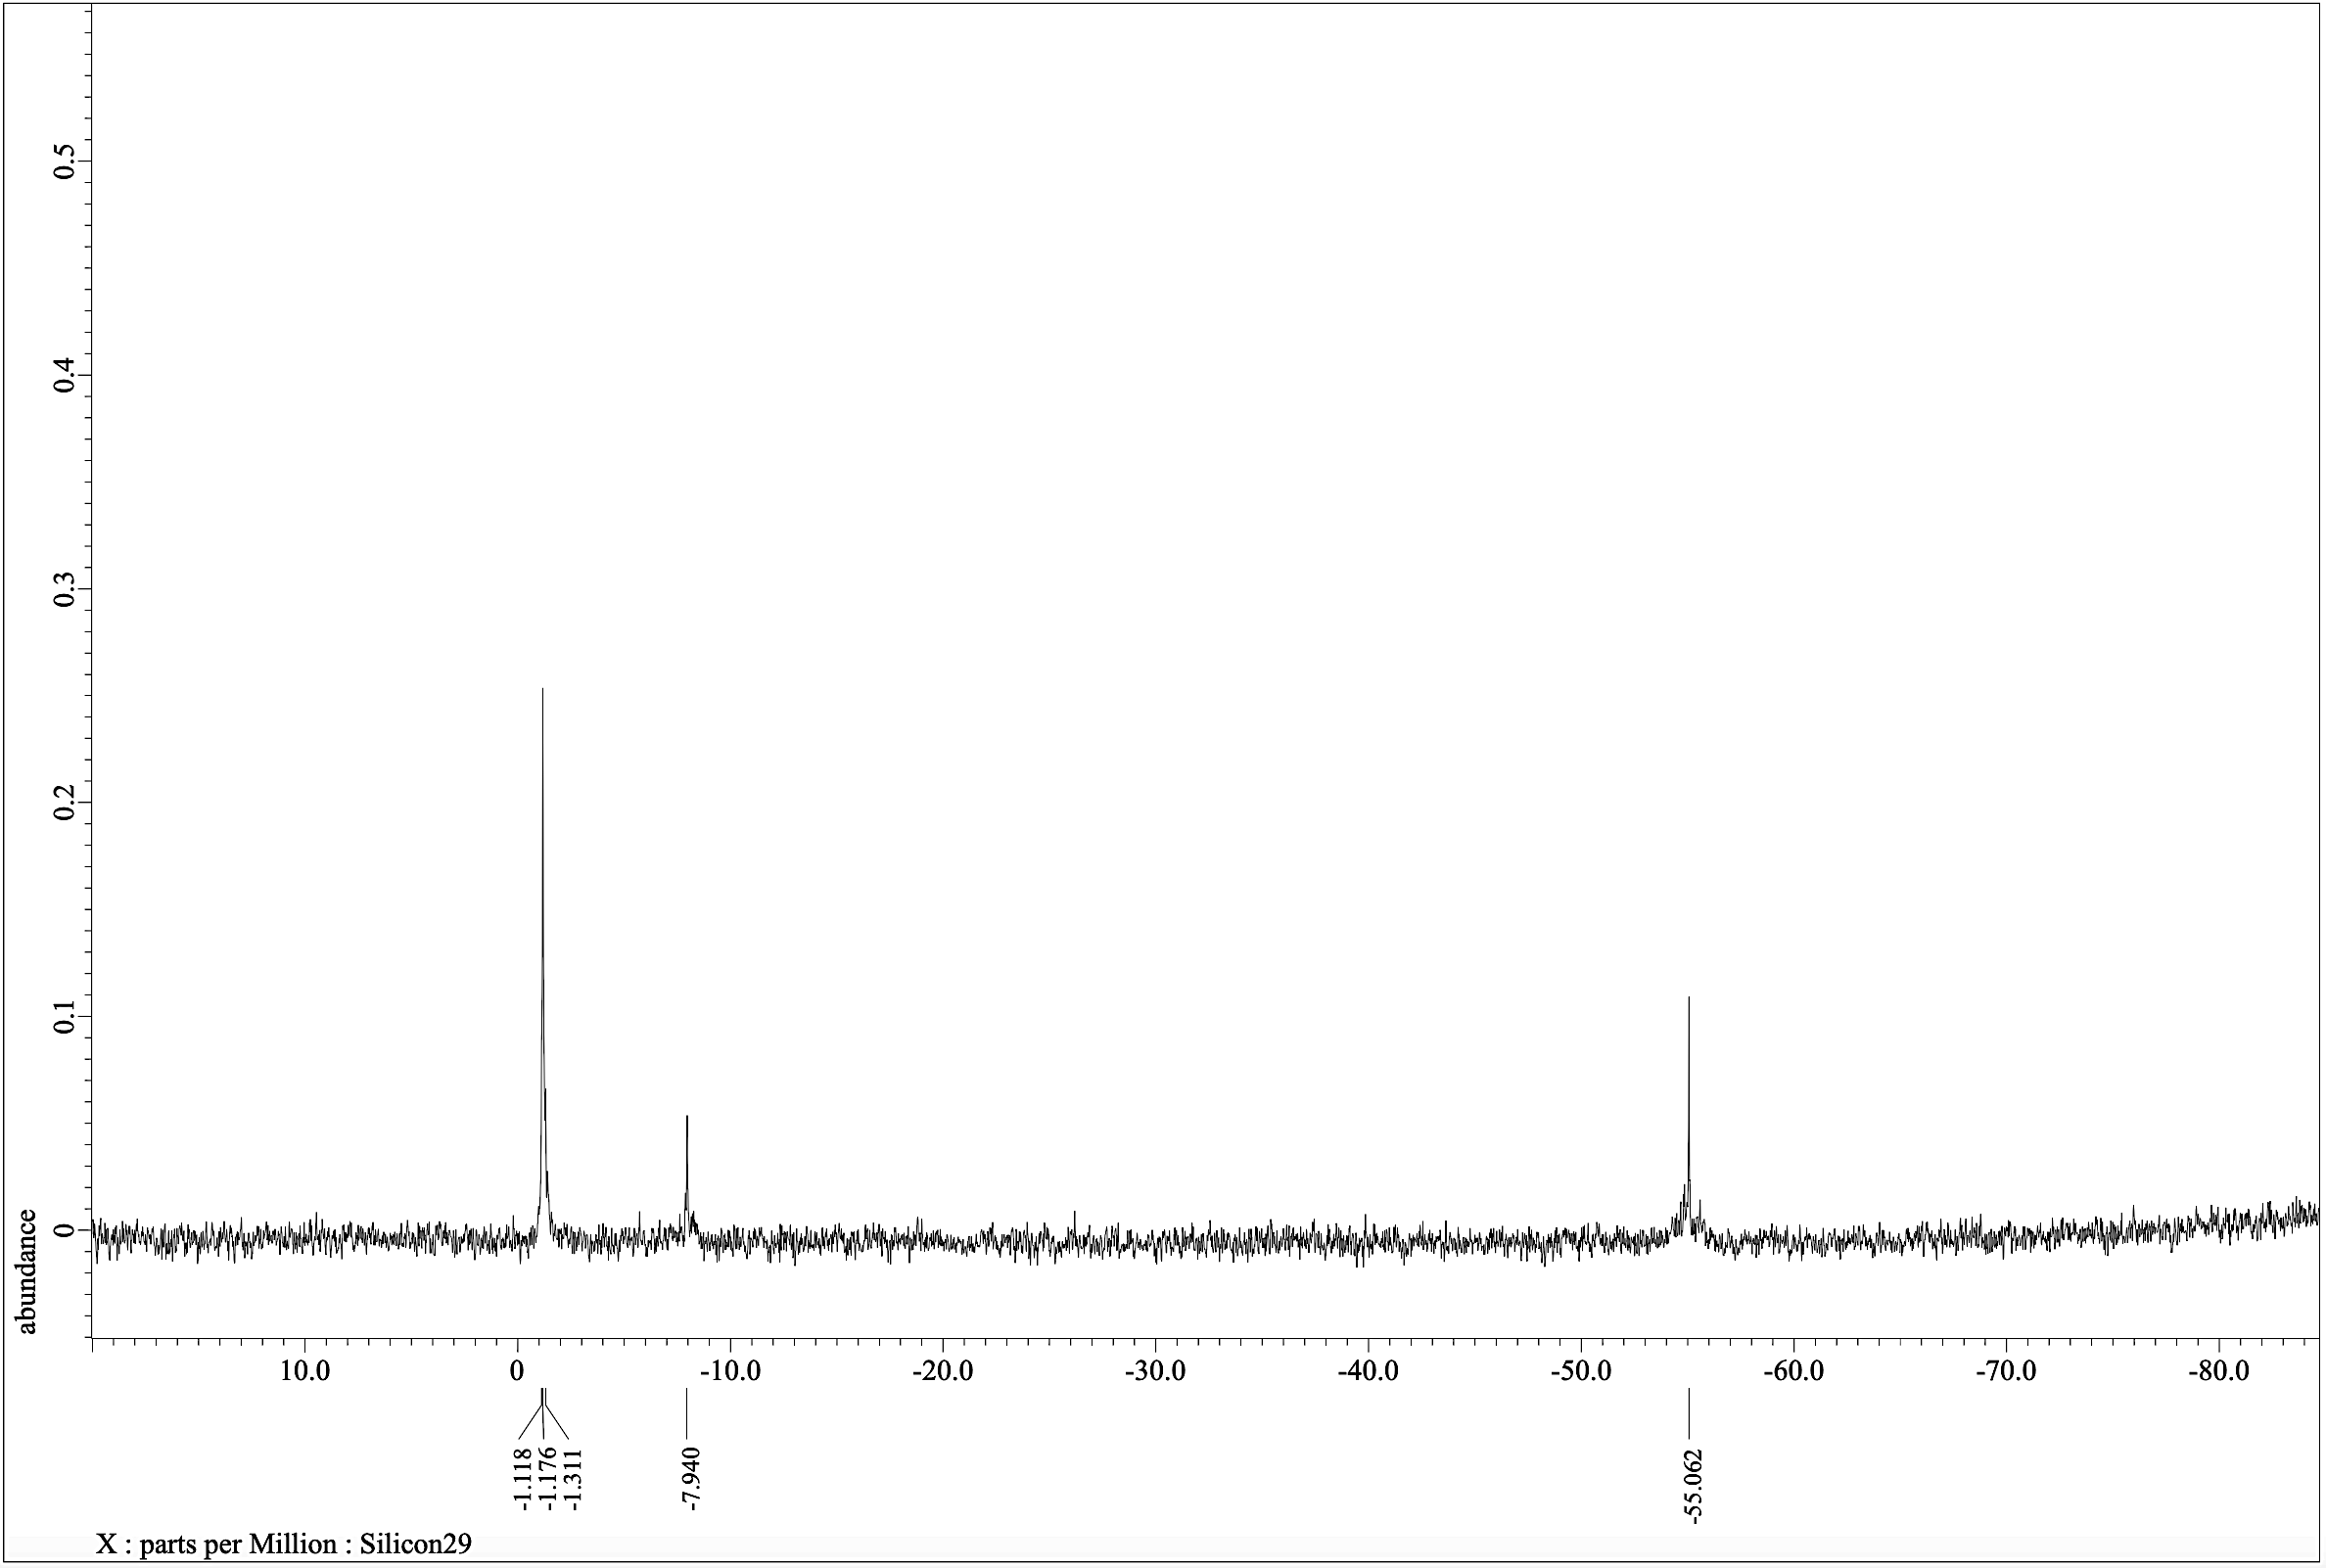
**

**10**

**-Si-**

**-Si-**

**-Si-**

29Si NMR (119.24 MHz, CDCl3)

**Figure S15: 29**Si NMR spectrum for **10**.

**
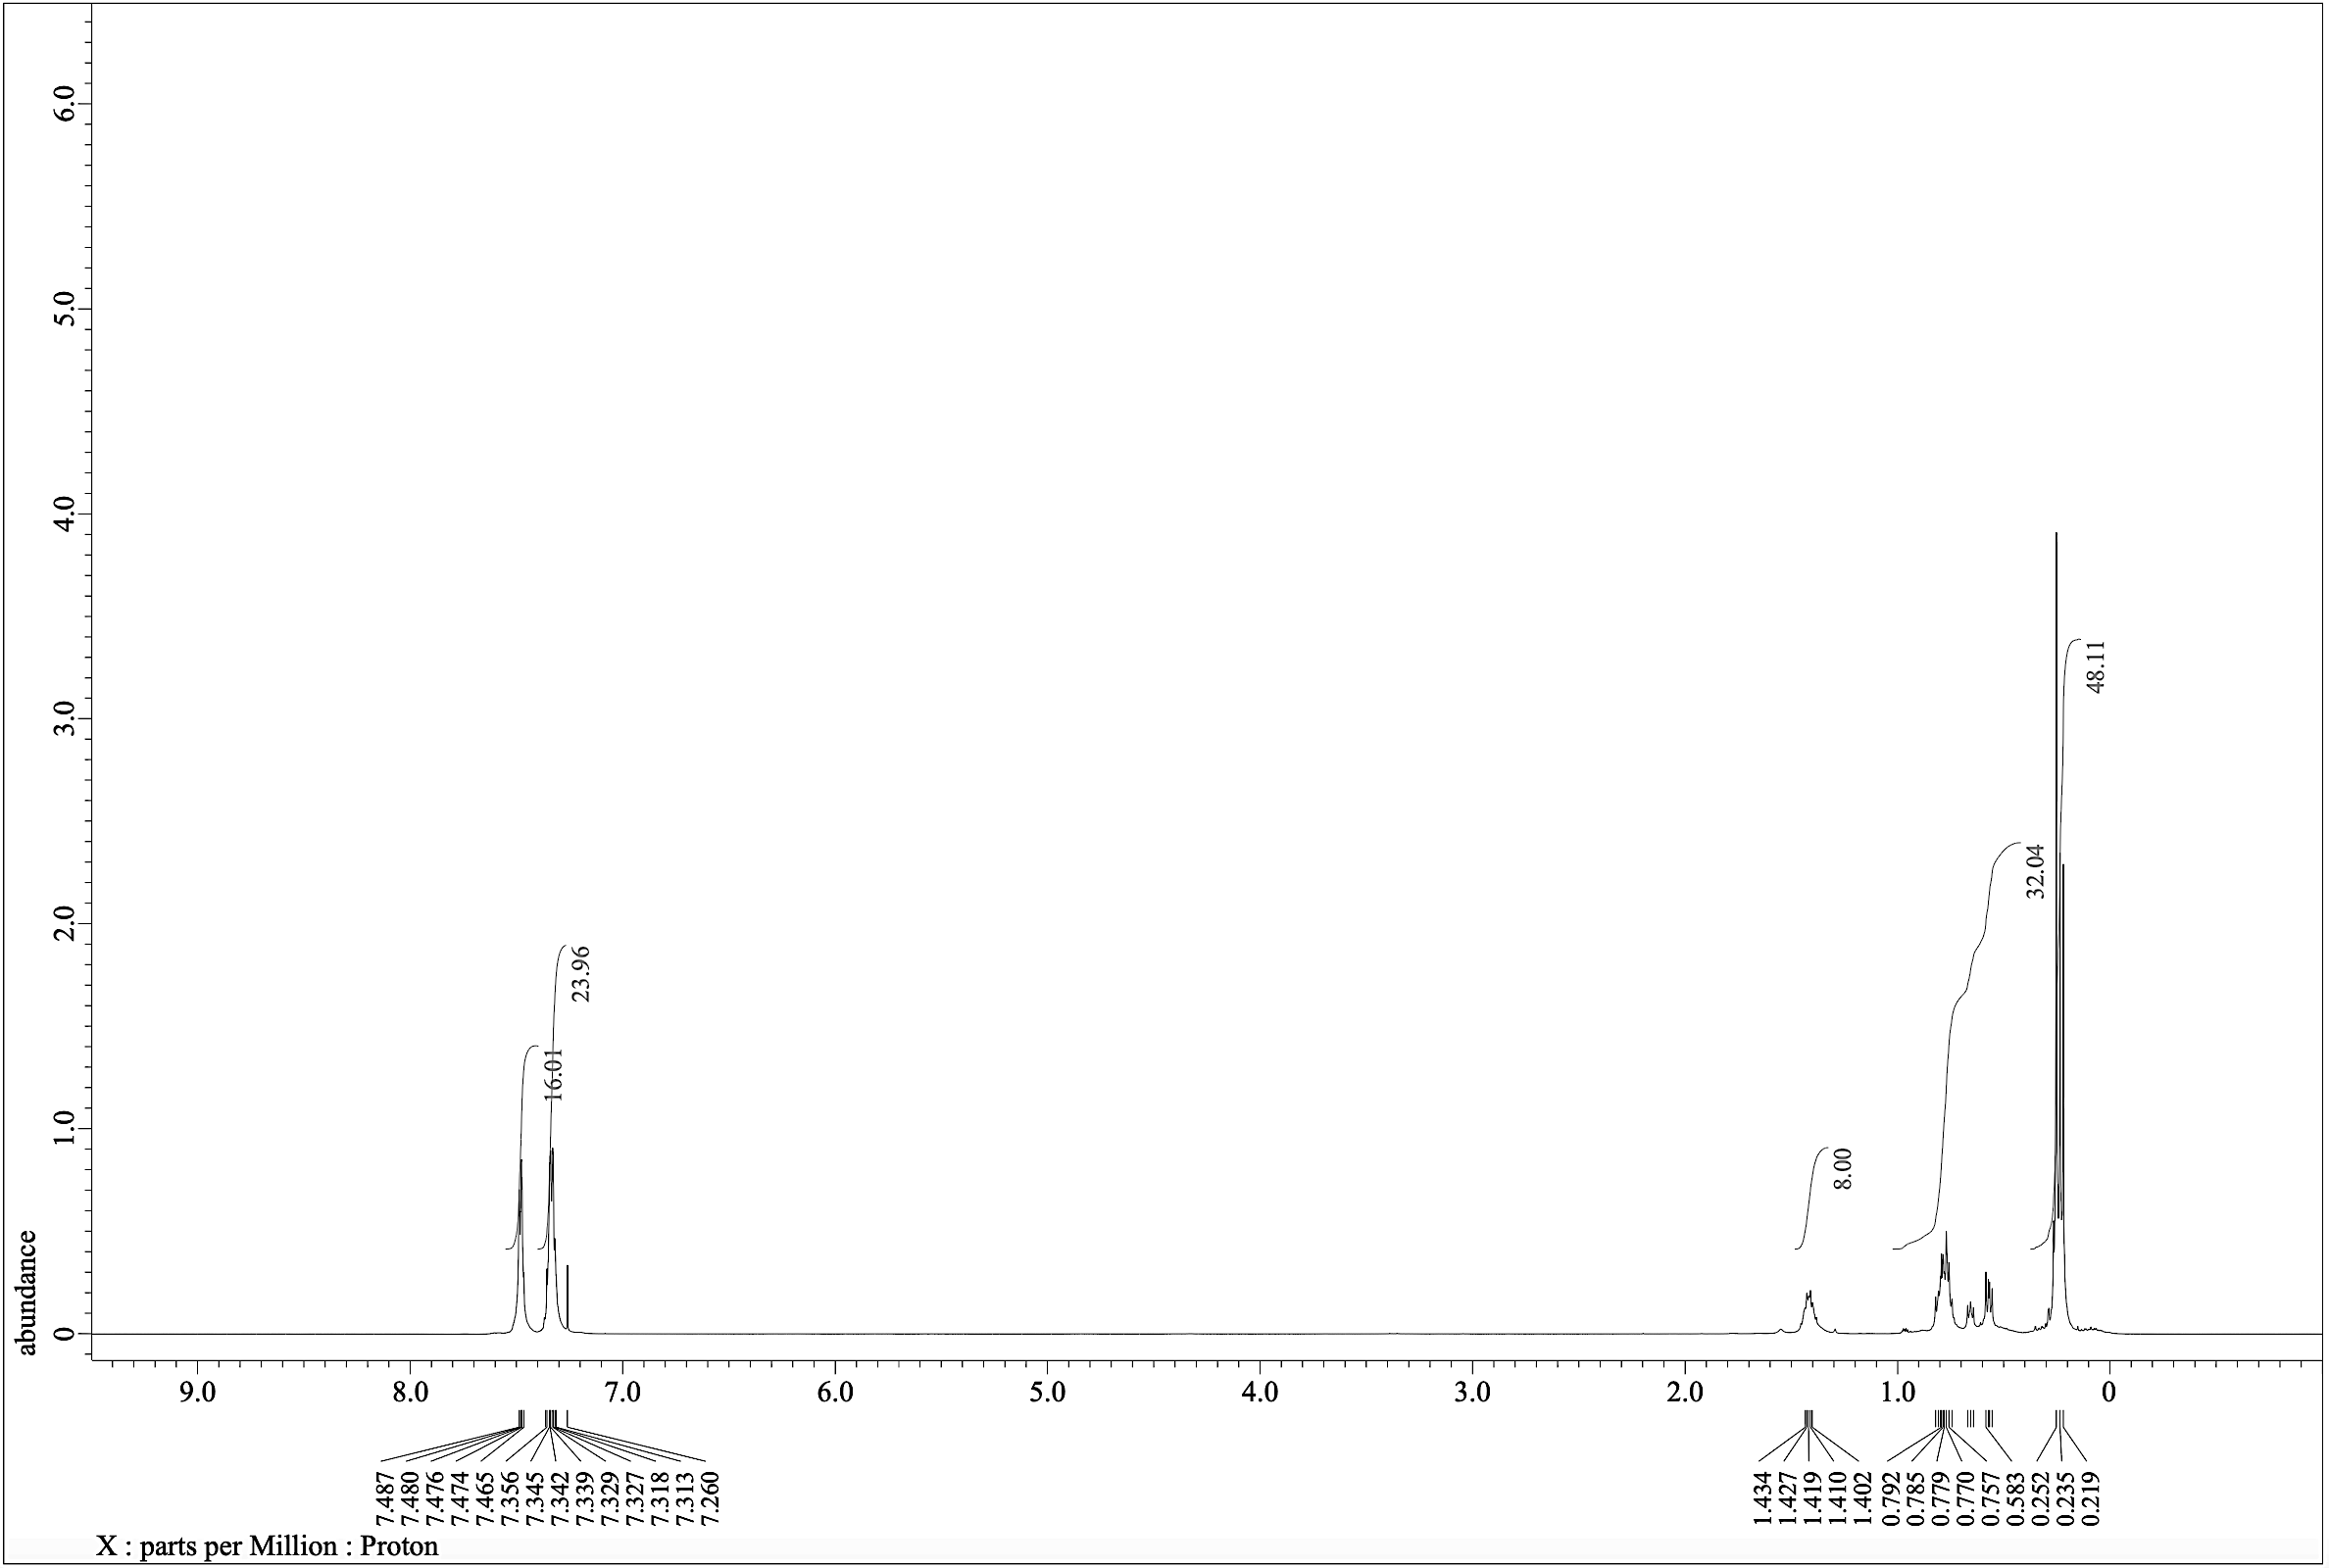
**

**11**

1H NMR (600.17 MHz, CDCl3)

**Figure S16: 1**H NMR spectrum for **11**.

**
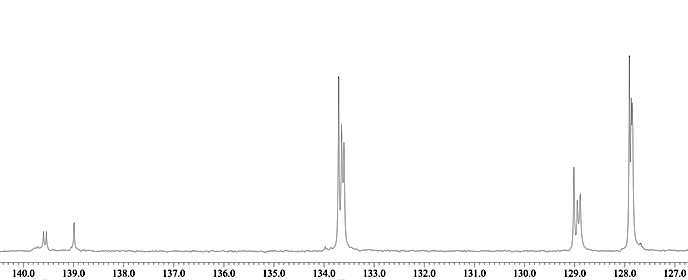

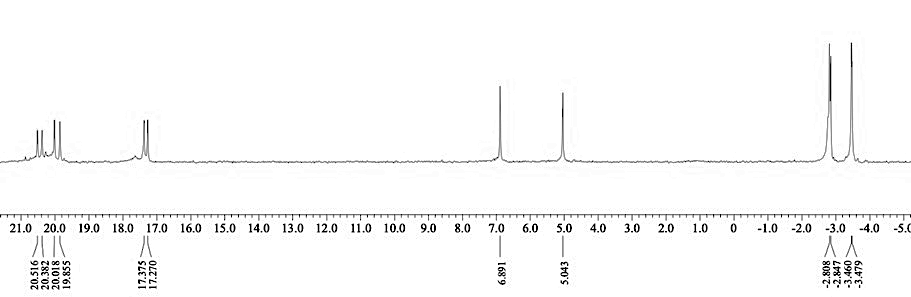

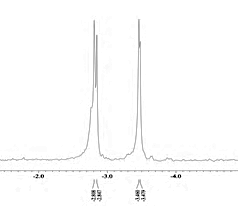

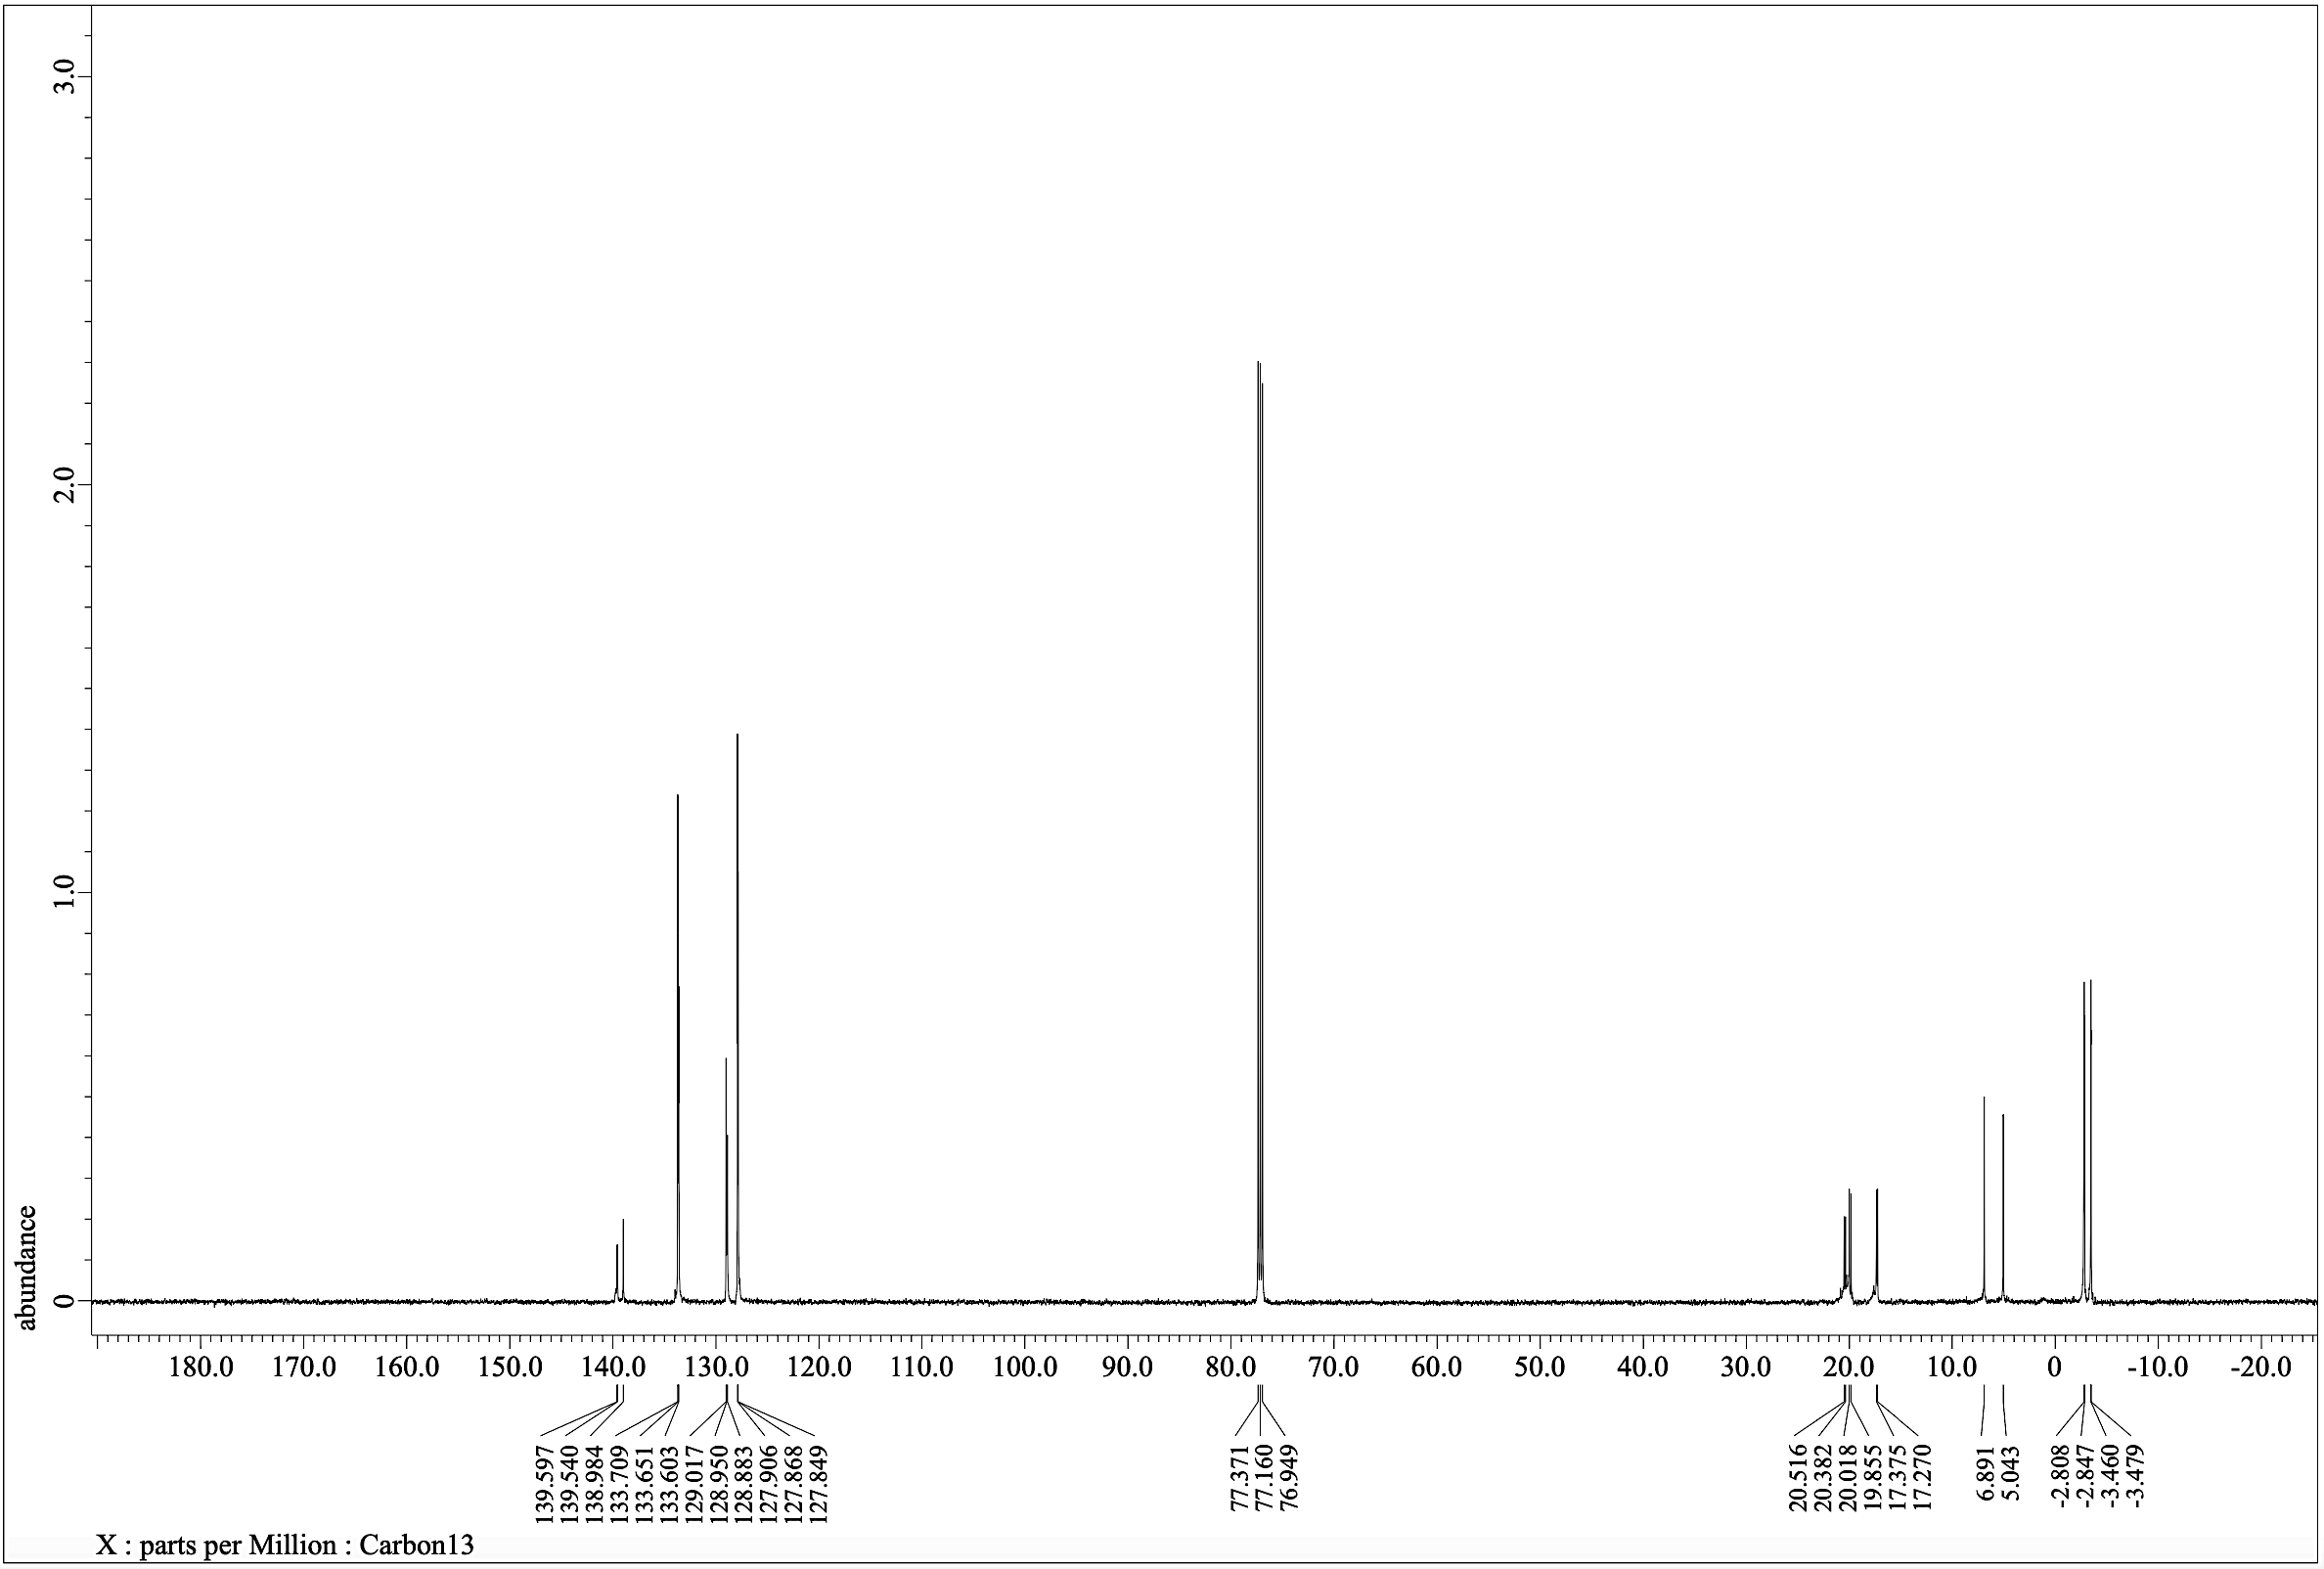
**

**11**

13C NMR (150.91 MHz, CDCl3)

**Figure S17: 13**C NMR spectrum for **11**.

**
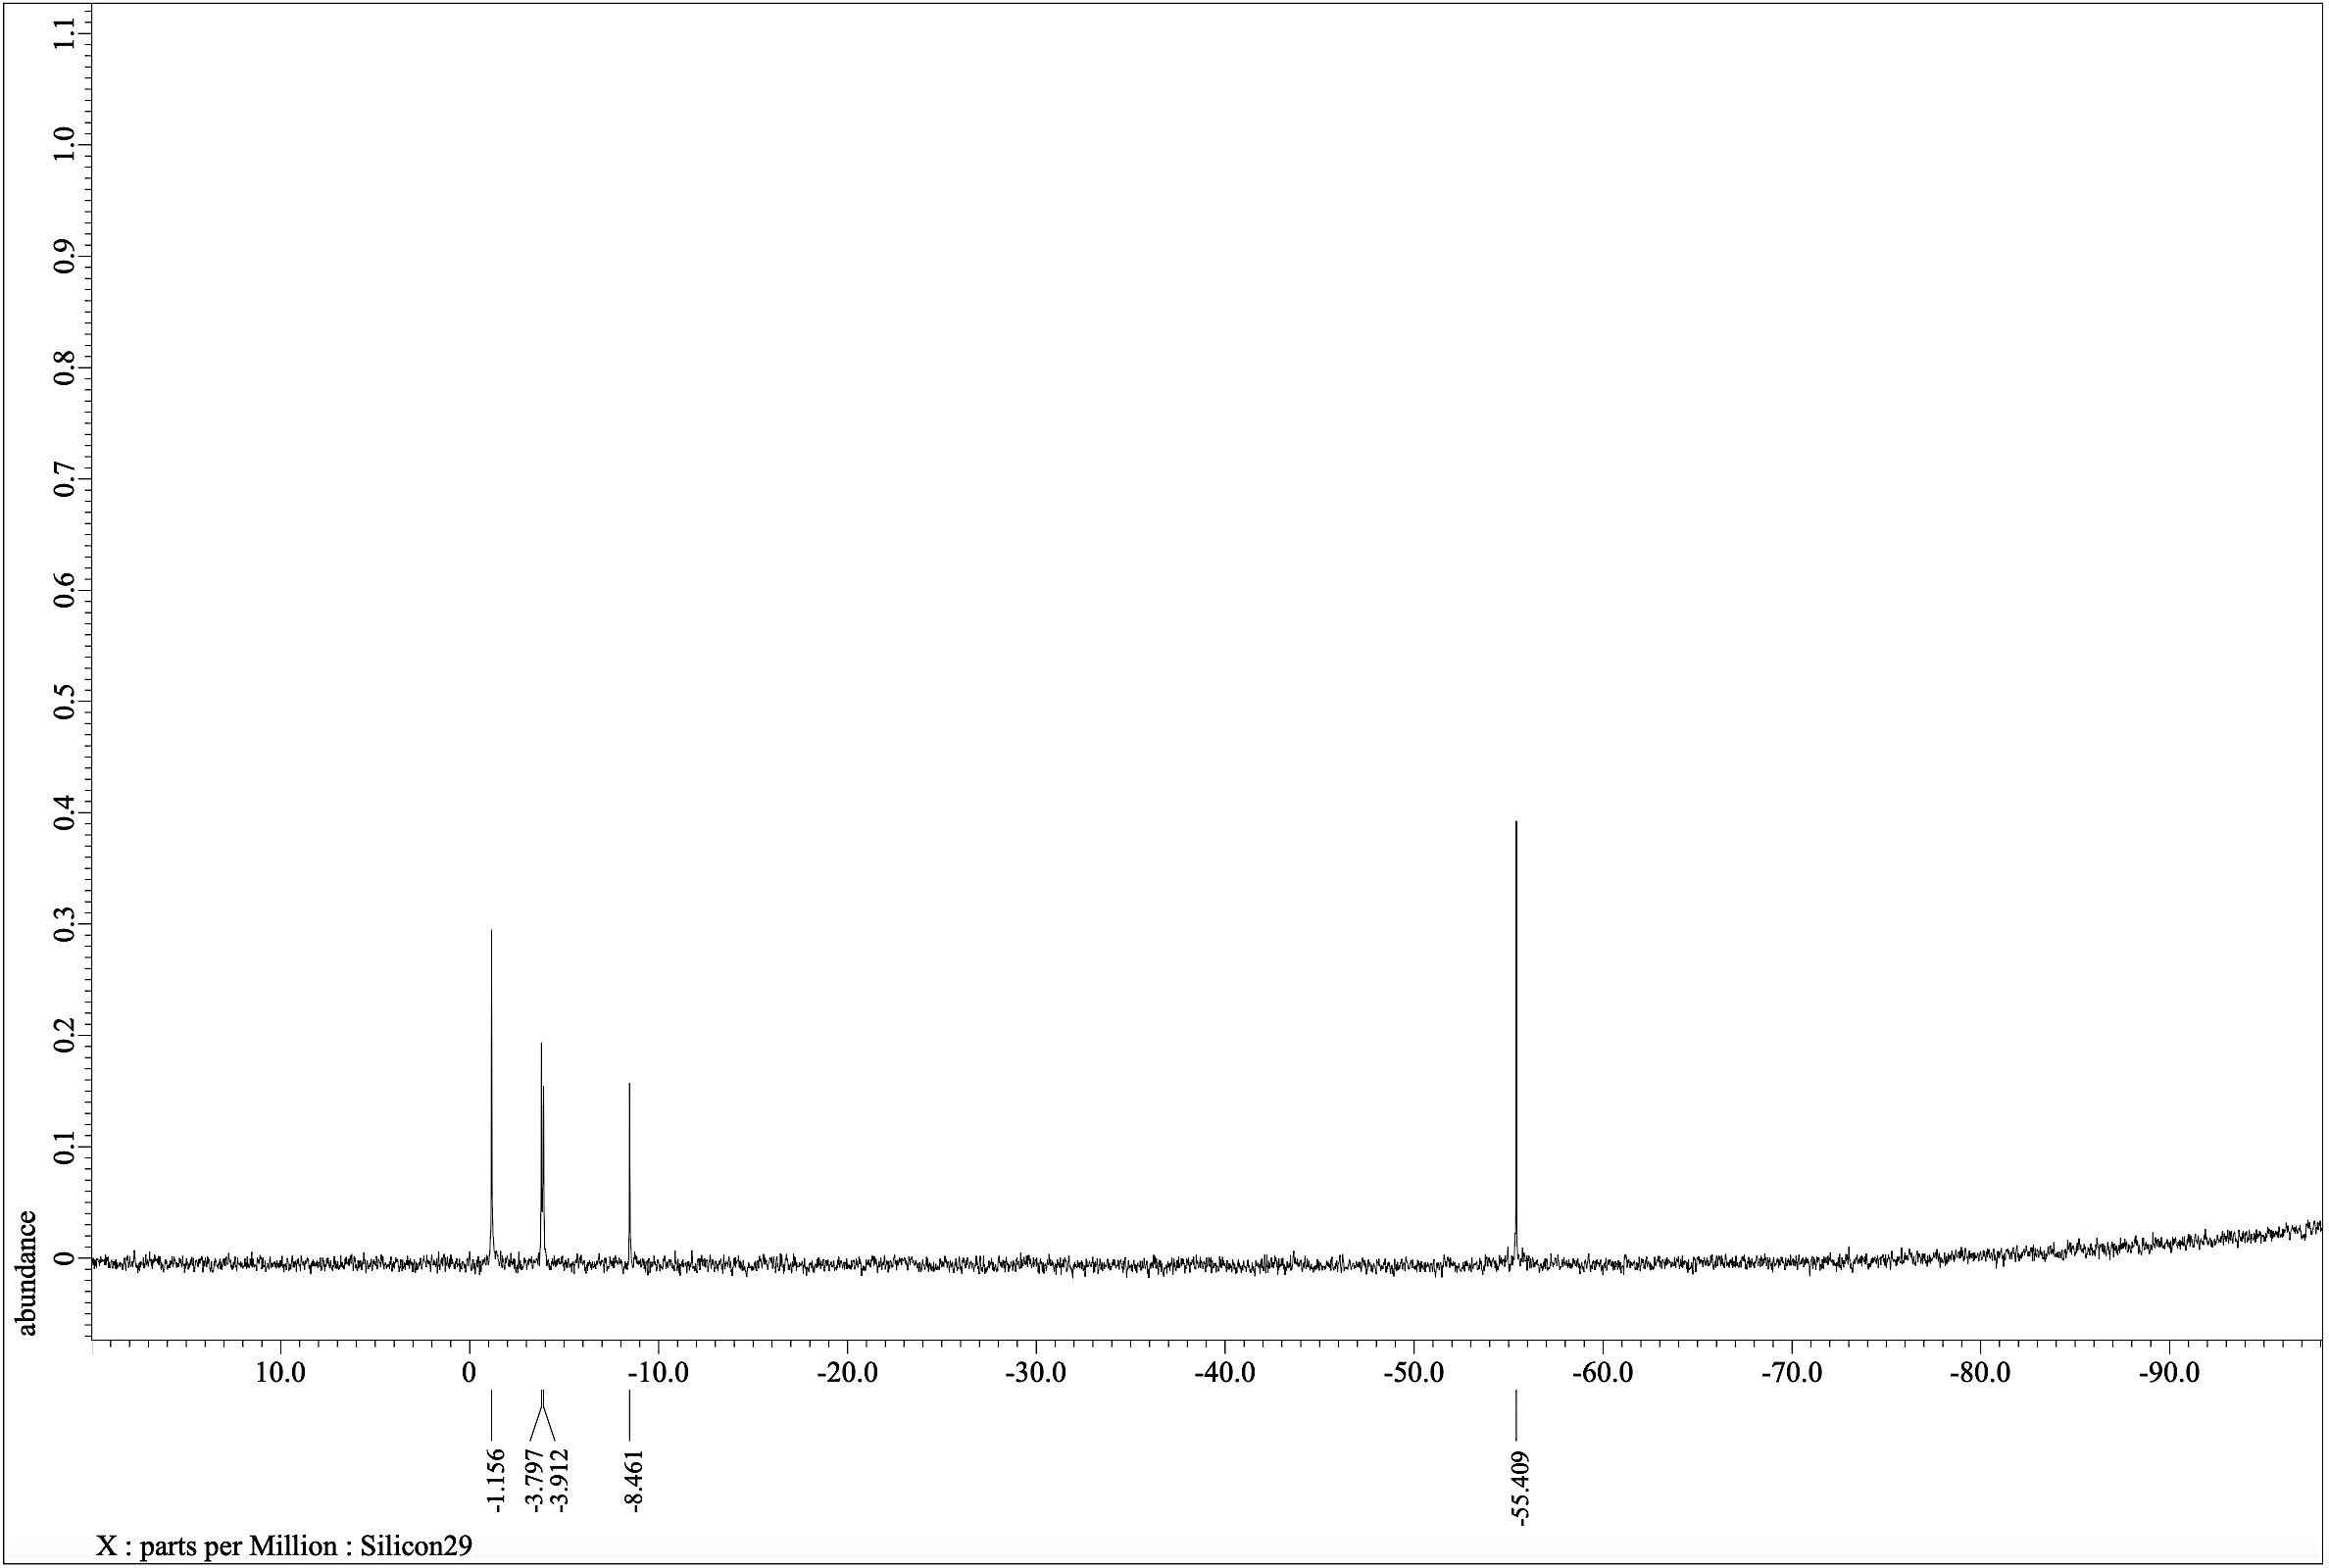
**

**-Si-**

**-Si-**

**-Si-**

**-Si-**

**11**

29Si NMR (119.24 MHz, CDCl3)

**Figure S18: 29**Si NMR spectrum for **11**.

**
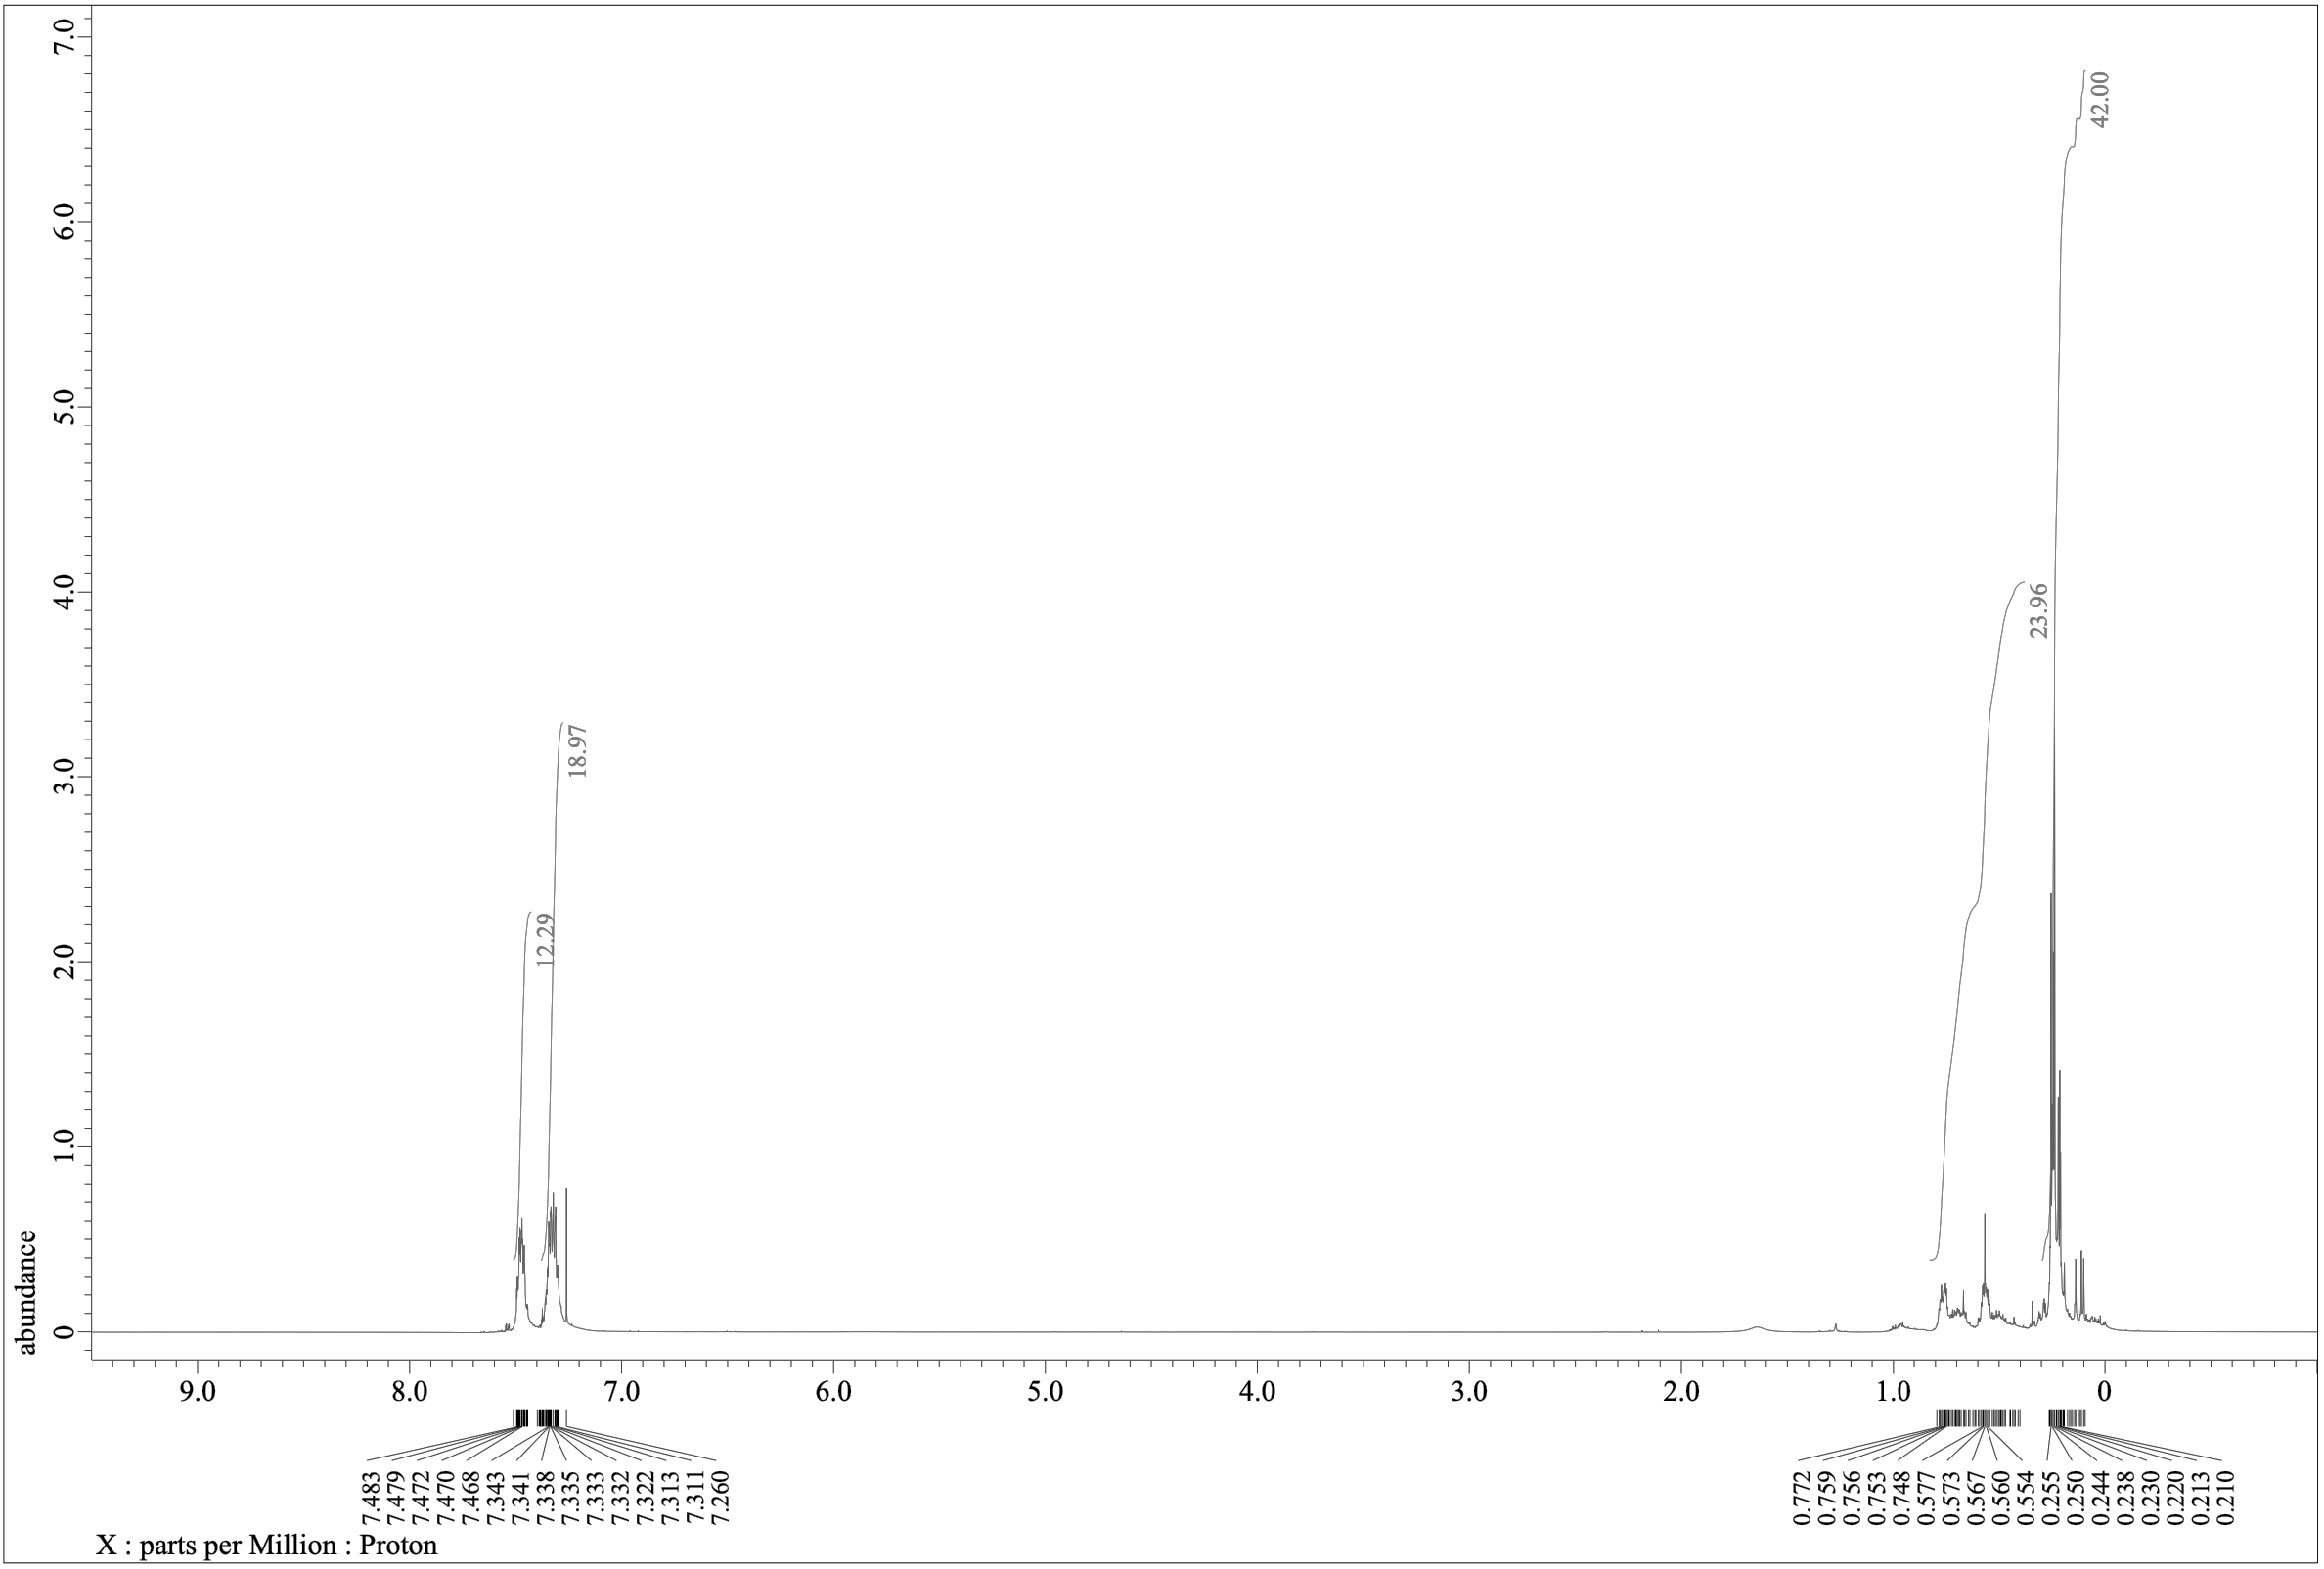
**

**12**

1H NMR (600.17 MHz, CDCl3)

**Figure S19: 1**H NMR spectrum for **12**.

**
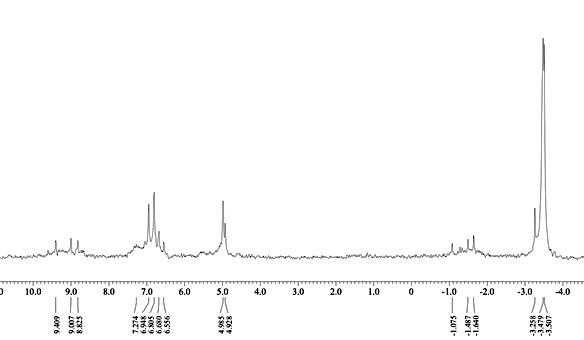

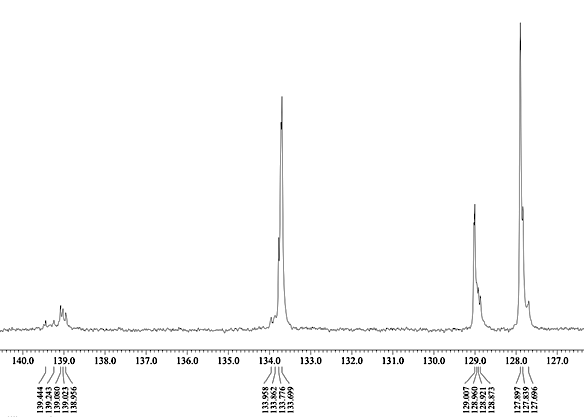

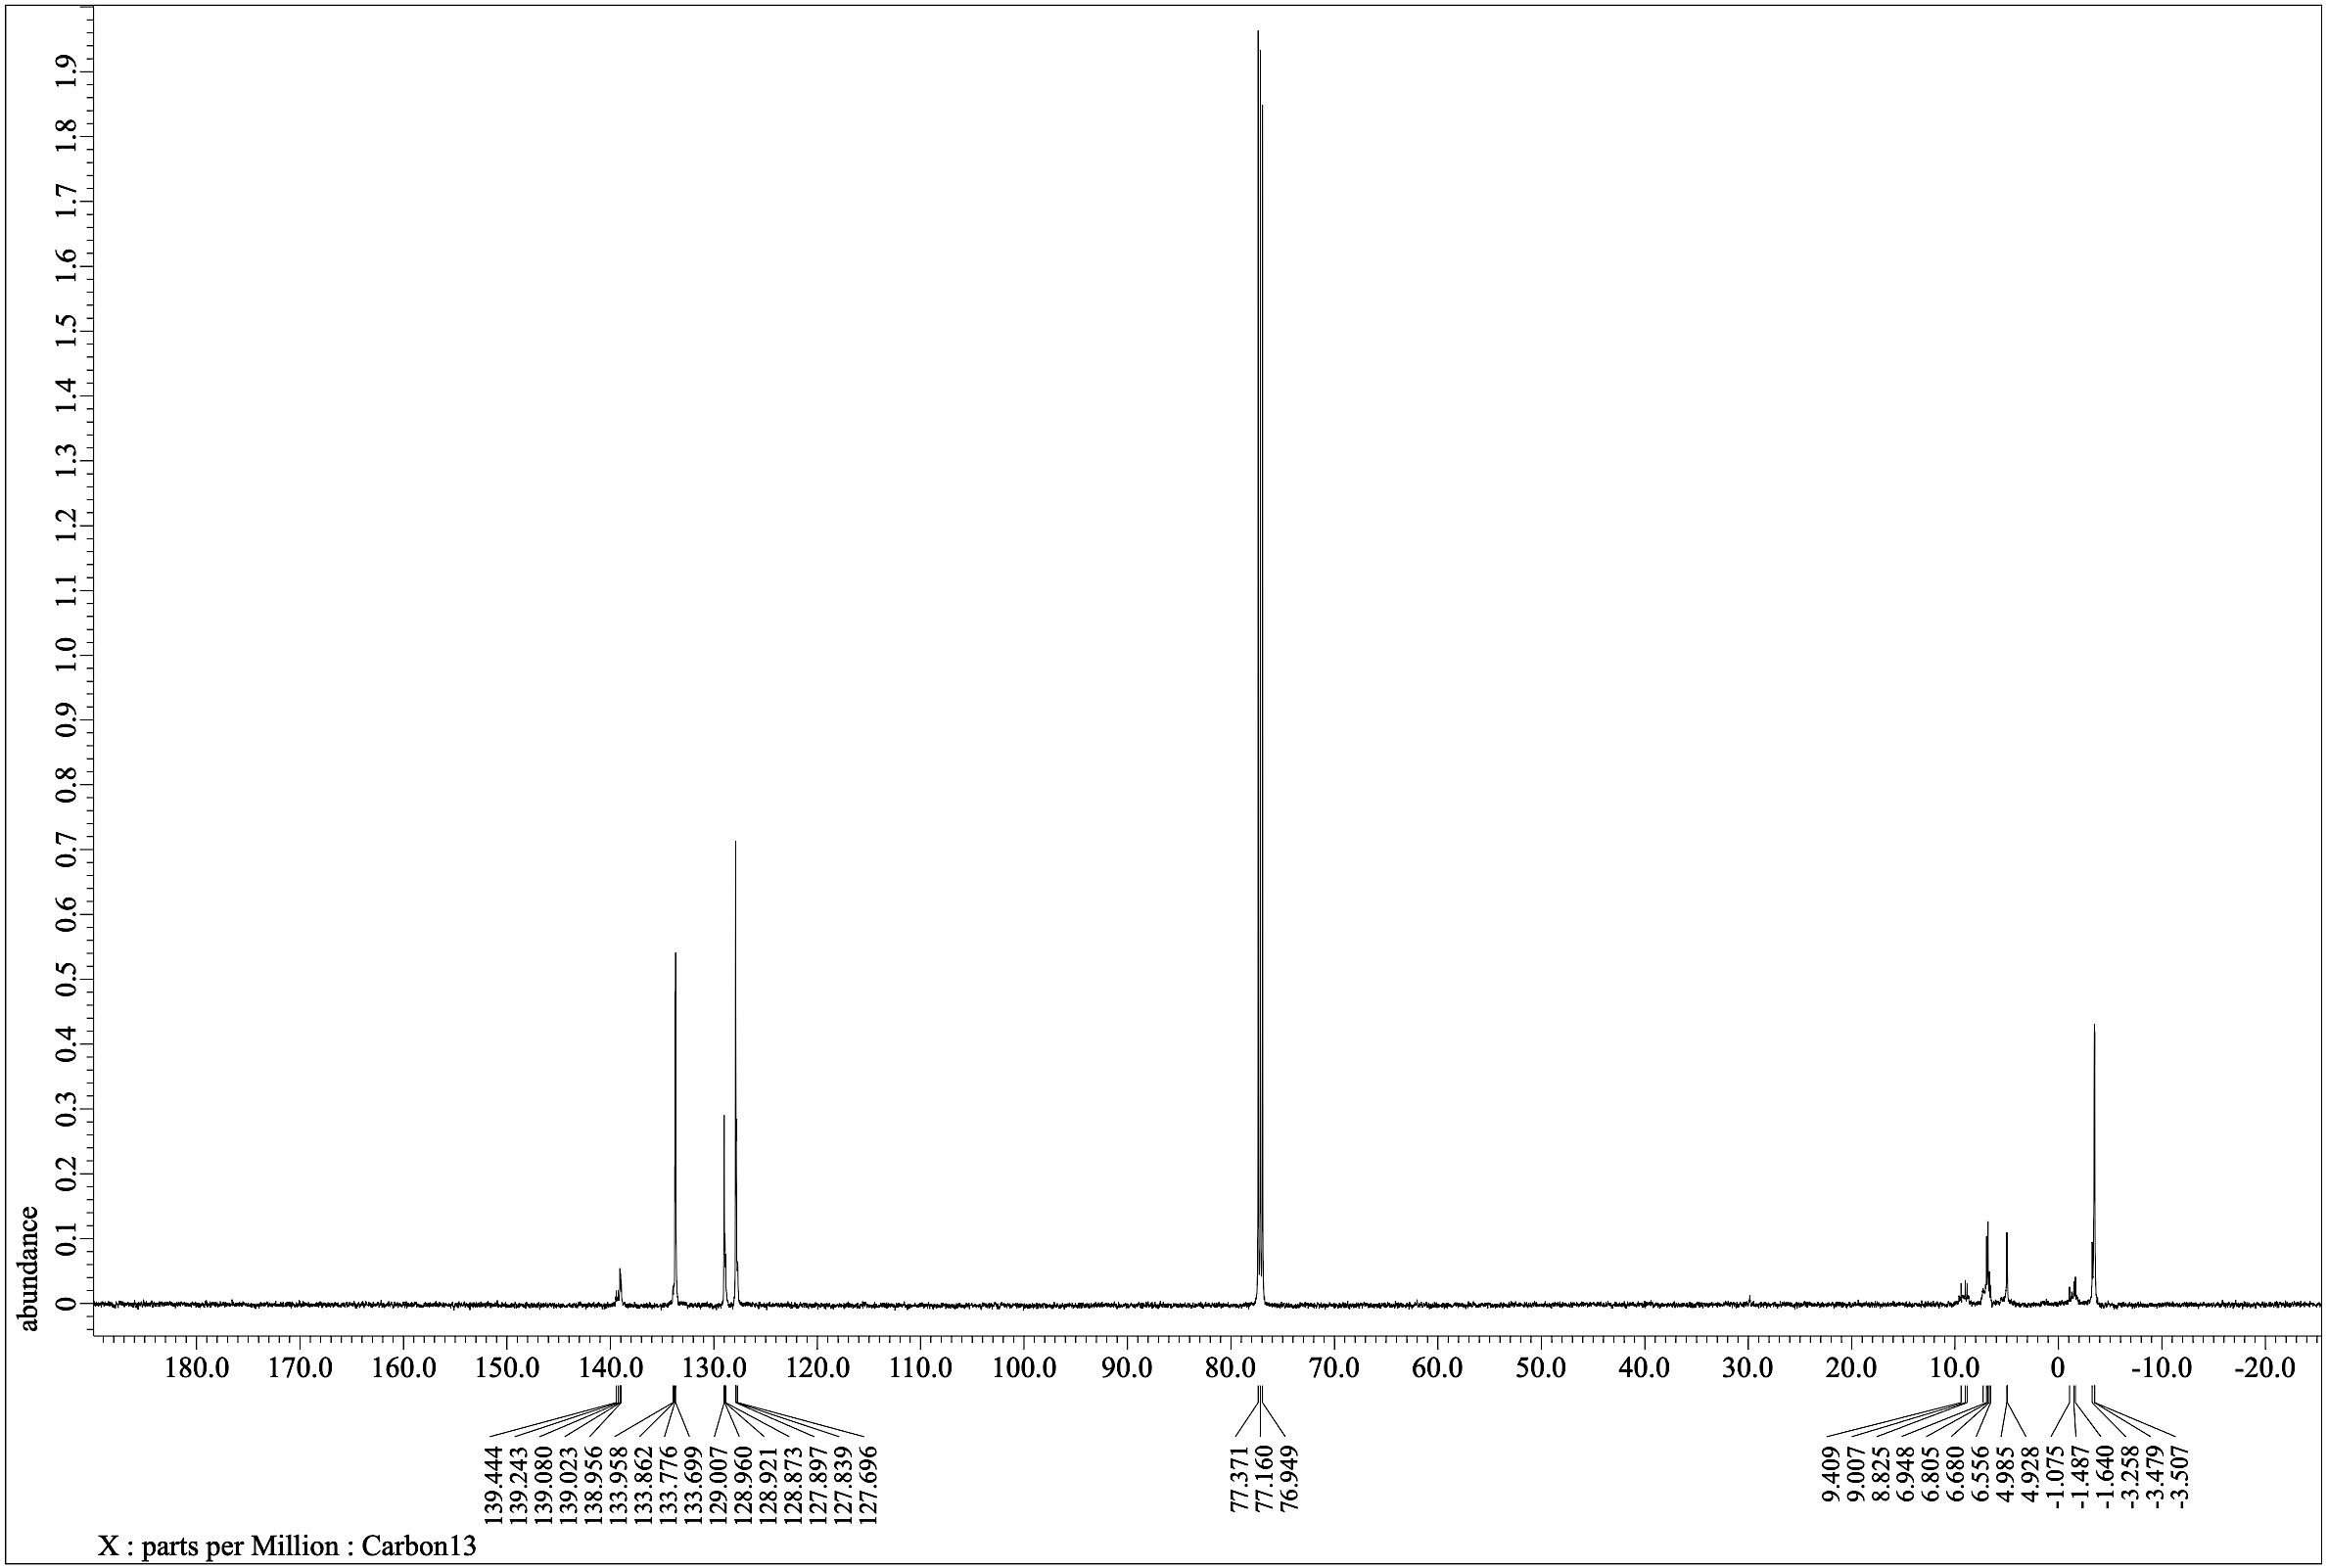
**

**12**

13C NMR (150.91 MHz, CDCl3)

**Figure S20: 13**C NMR spectrum for **12**.

**
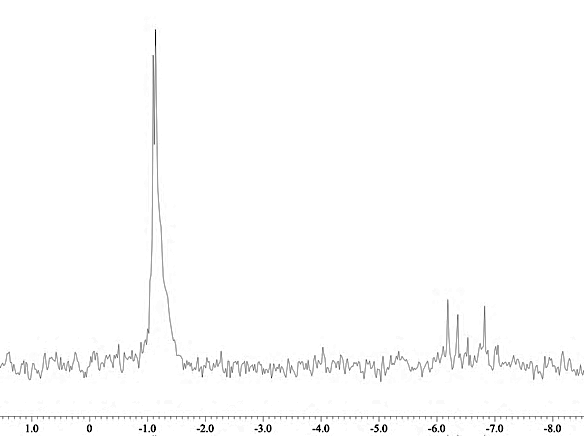

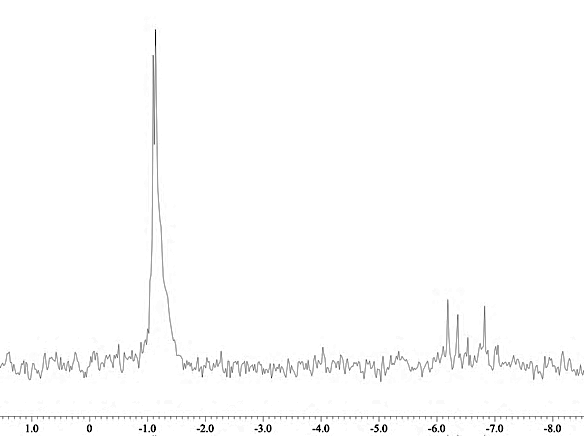

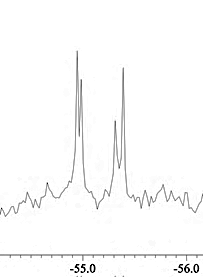

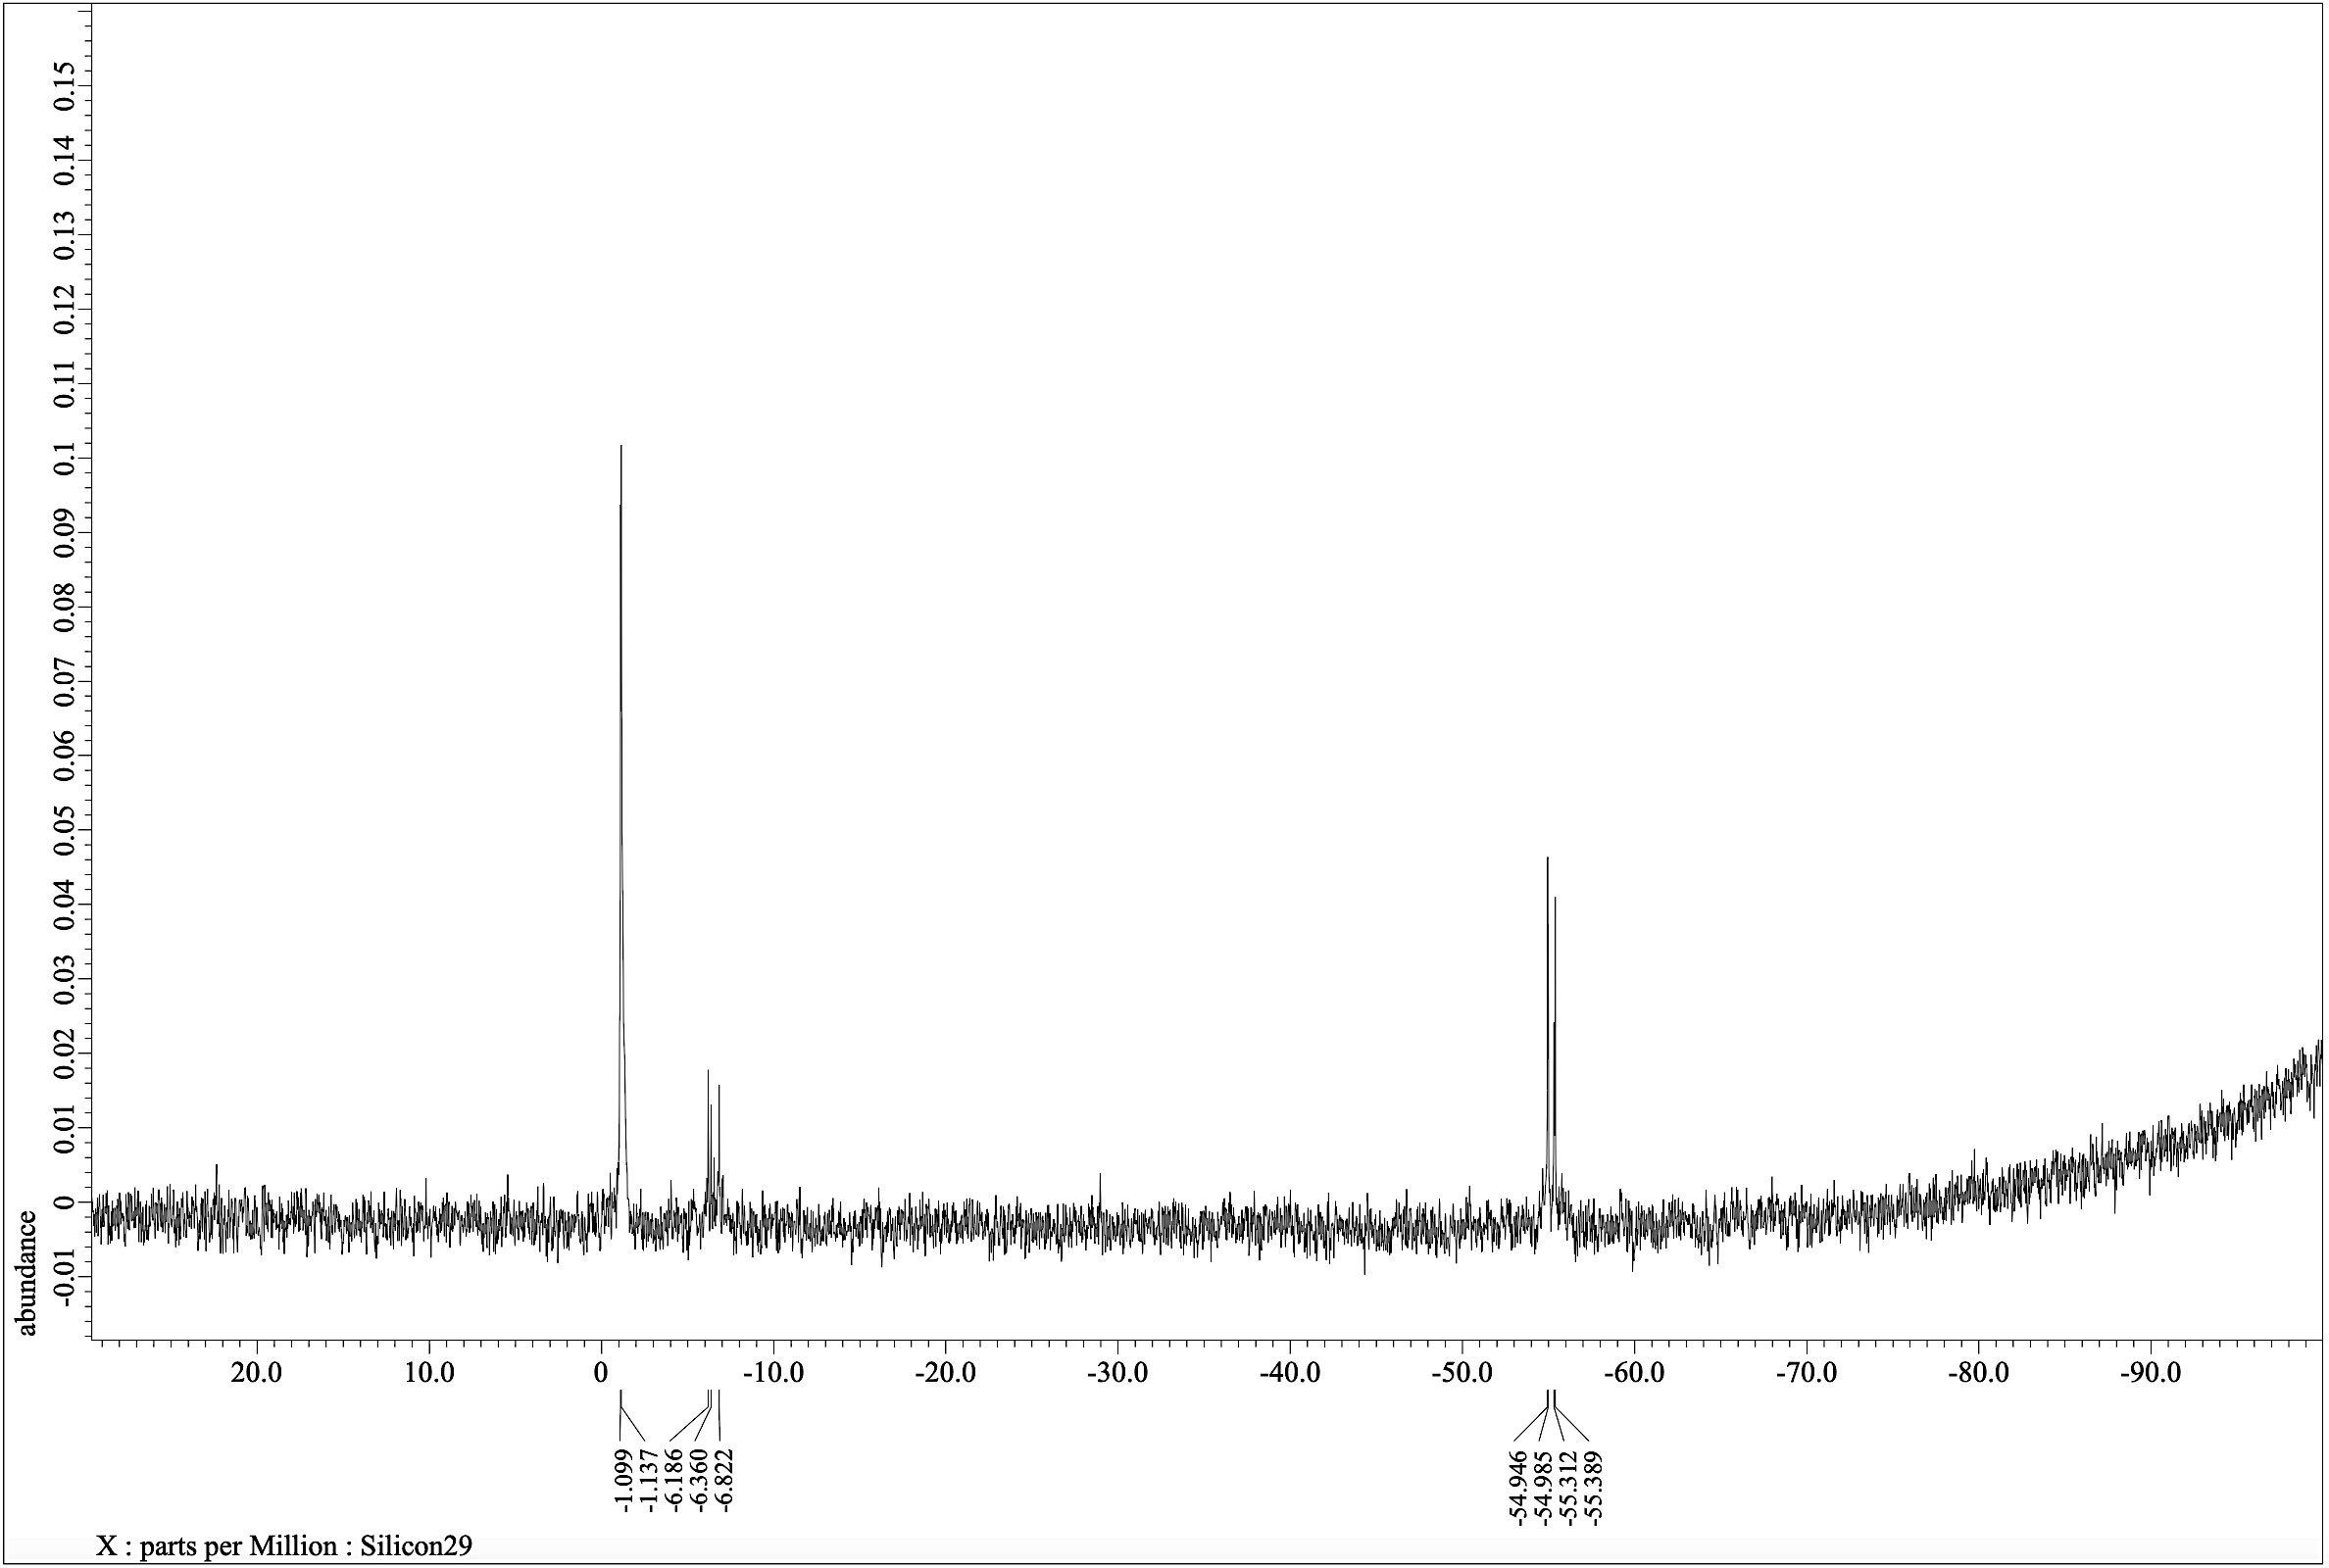
**

**-Si-**

**-Si-**

**12**

**-Si-**

29Si NMR (119.24 MHz, CDCl3)

**Figure S21: 29**Si NMR spectrum for **12**.

**
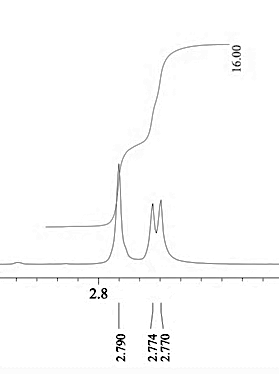

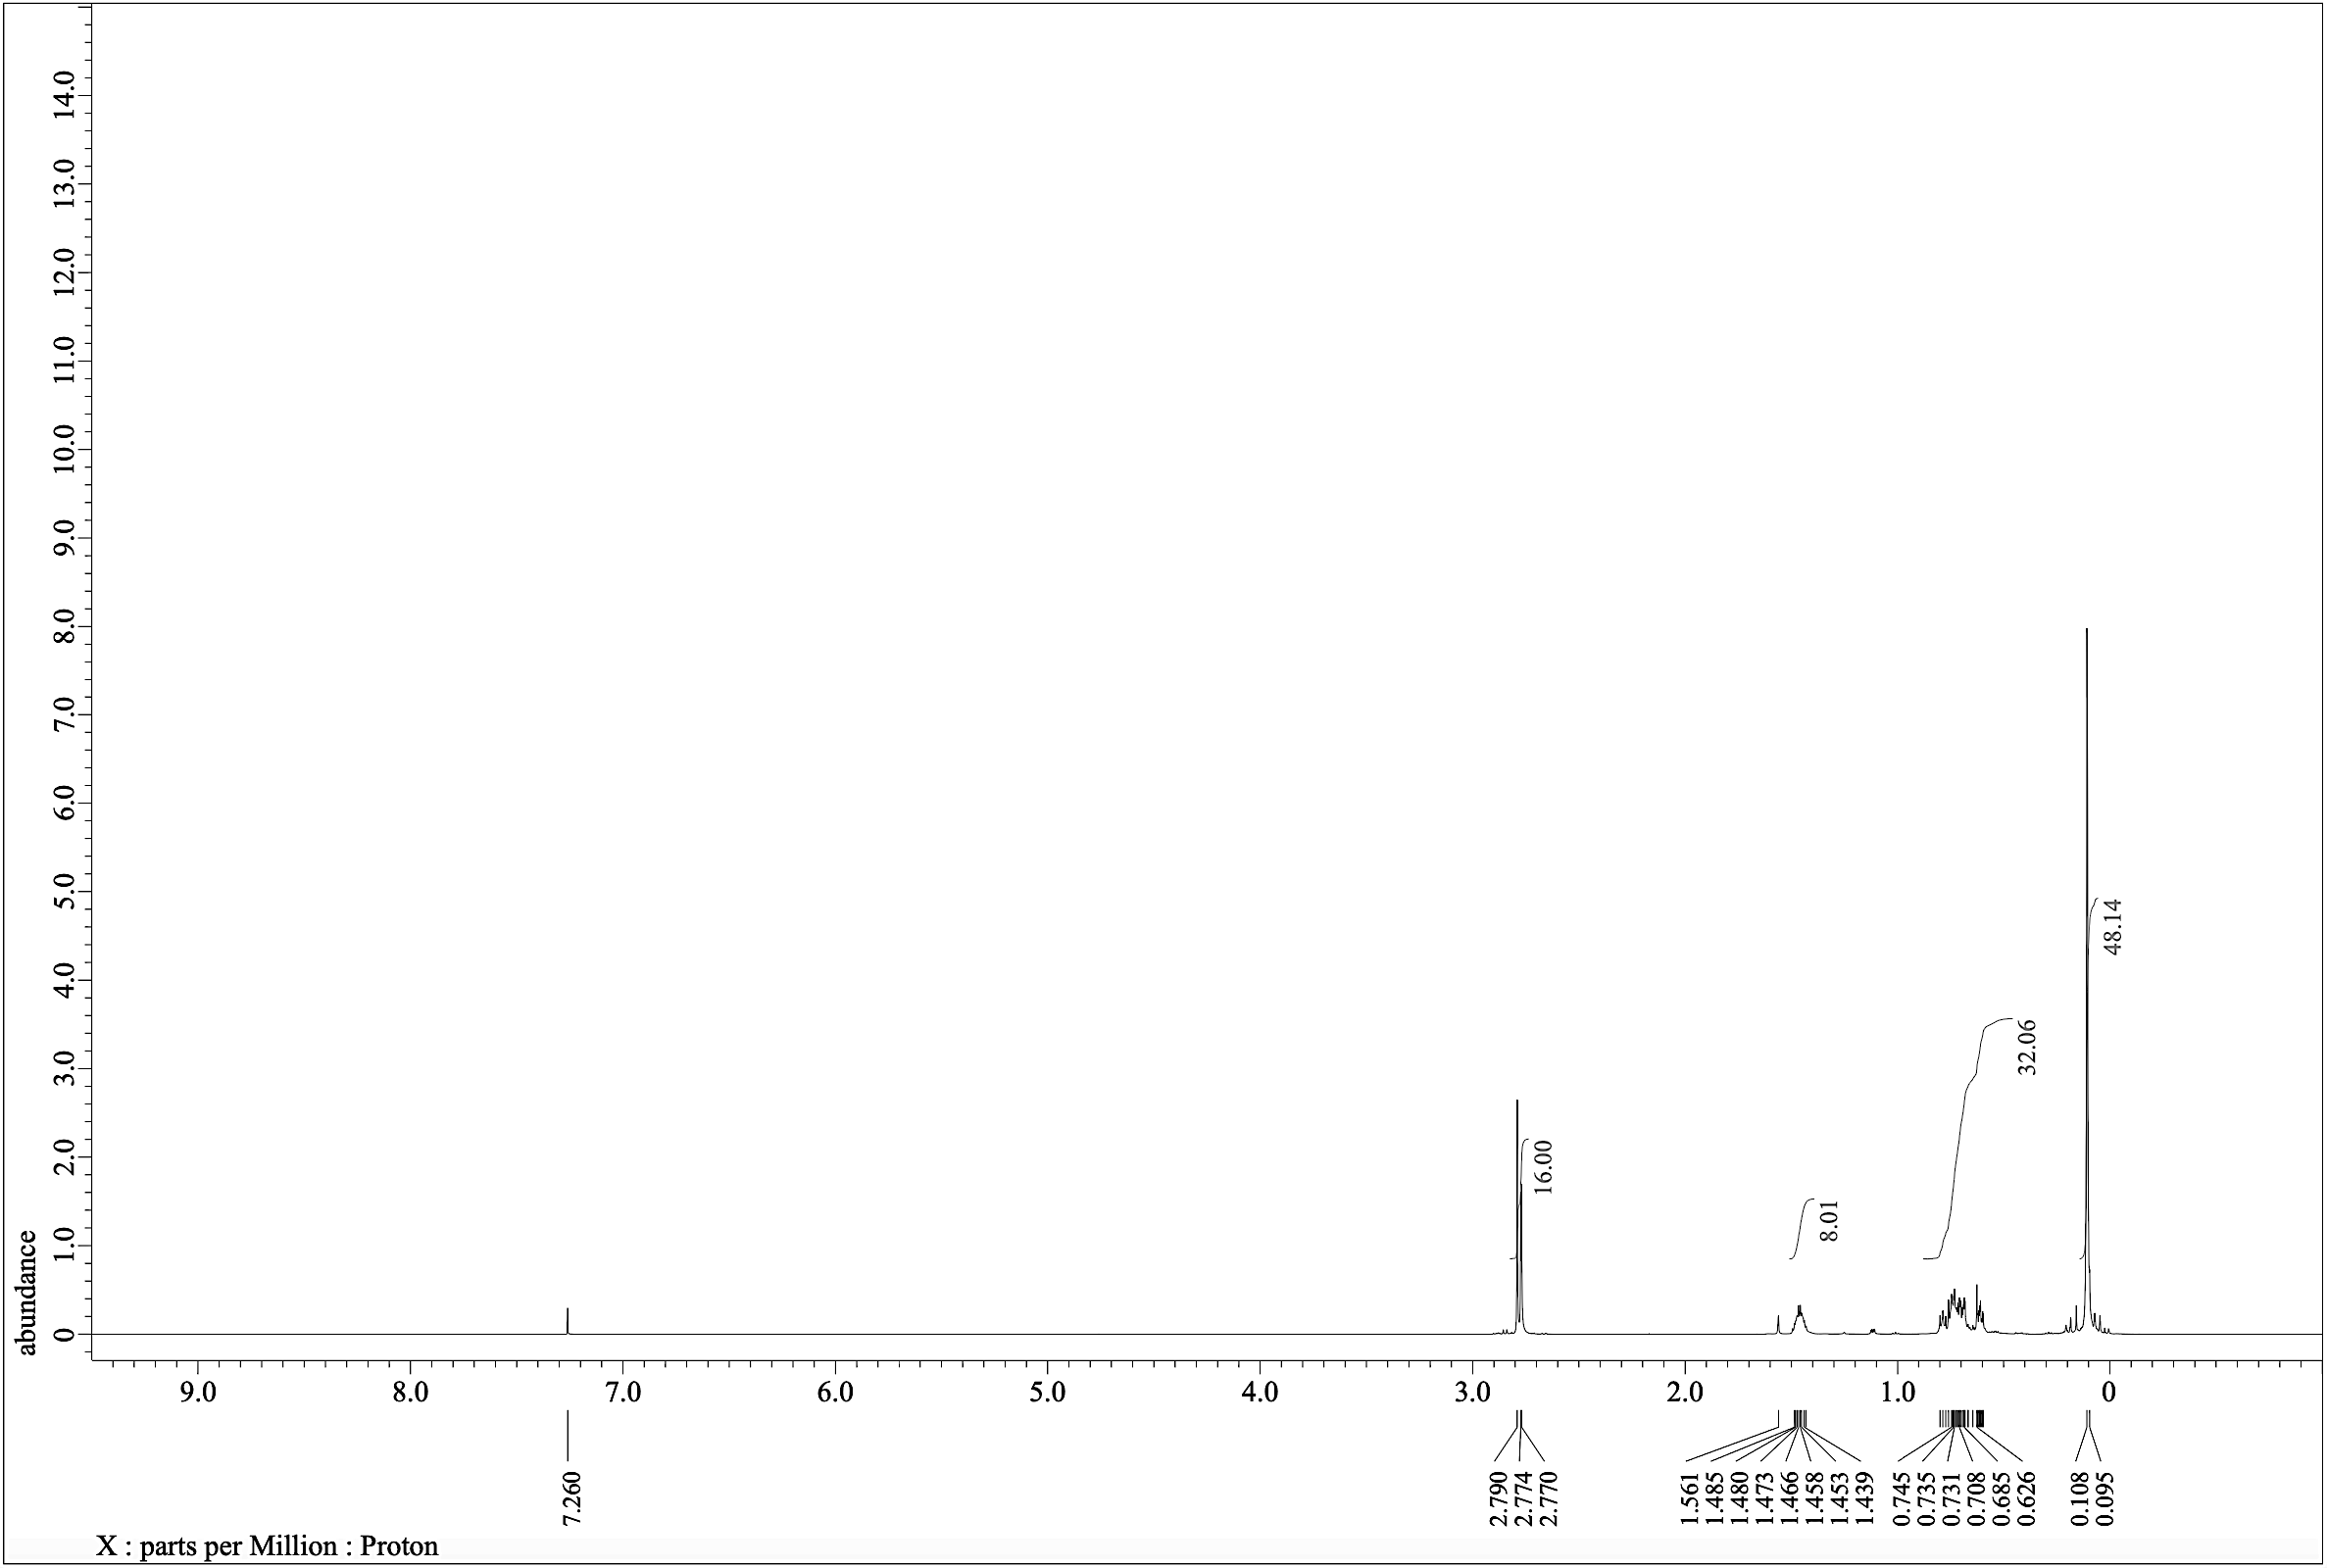
**

**13**

1H NMR (600.17 MHz, CDCl3)

**Figure S22: 1**H NMR spectrum for **13**.

**
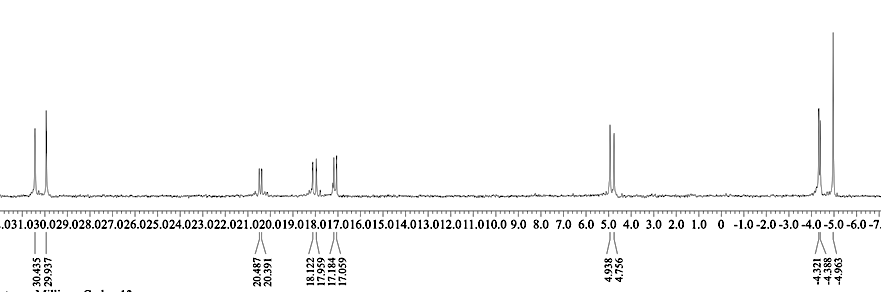

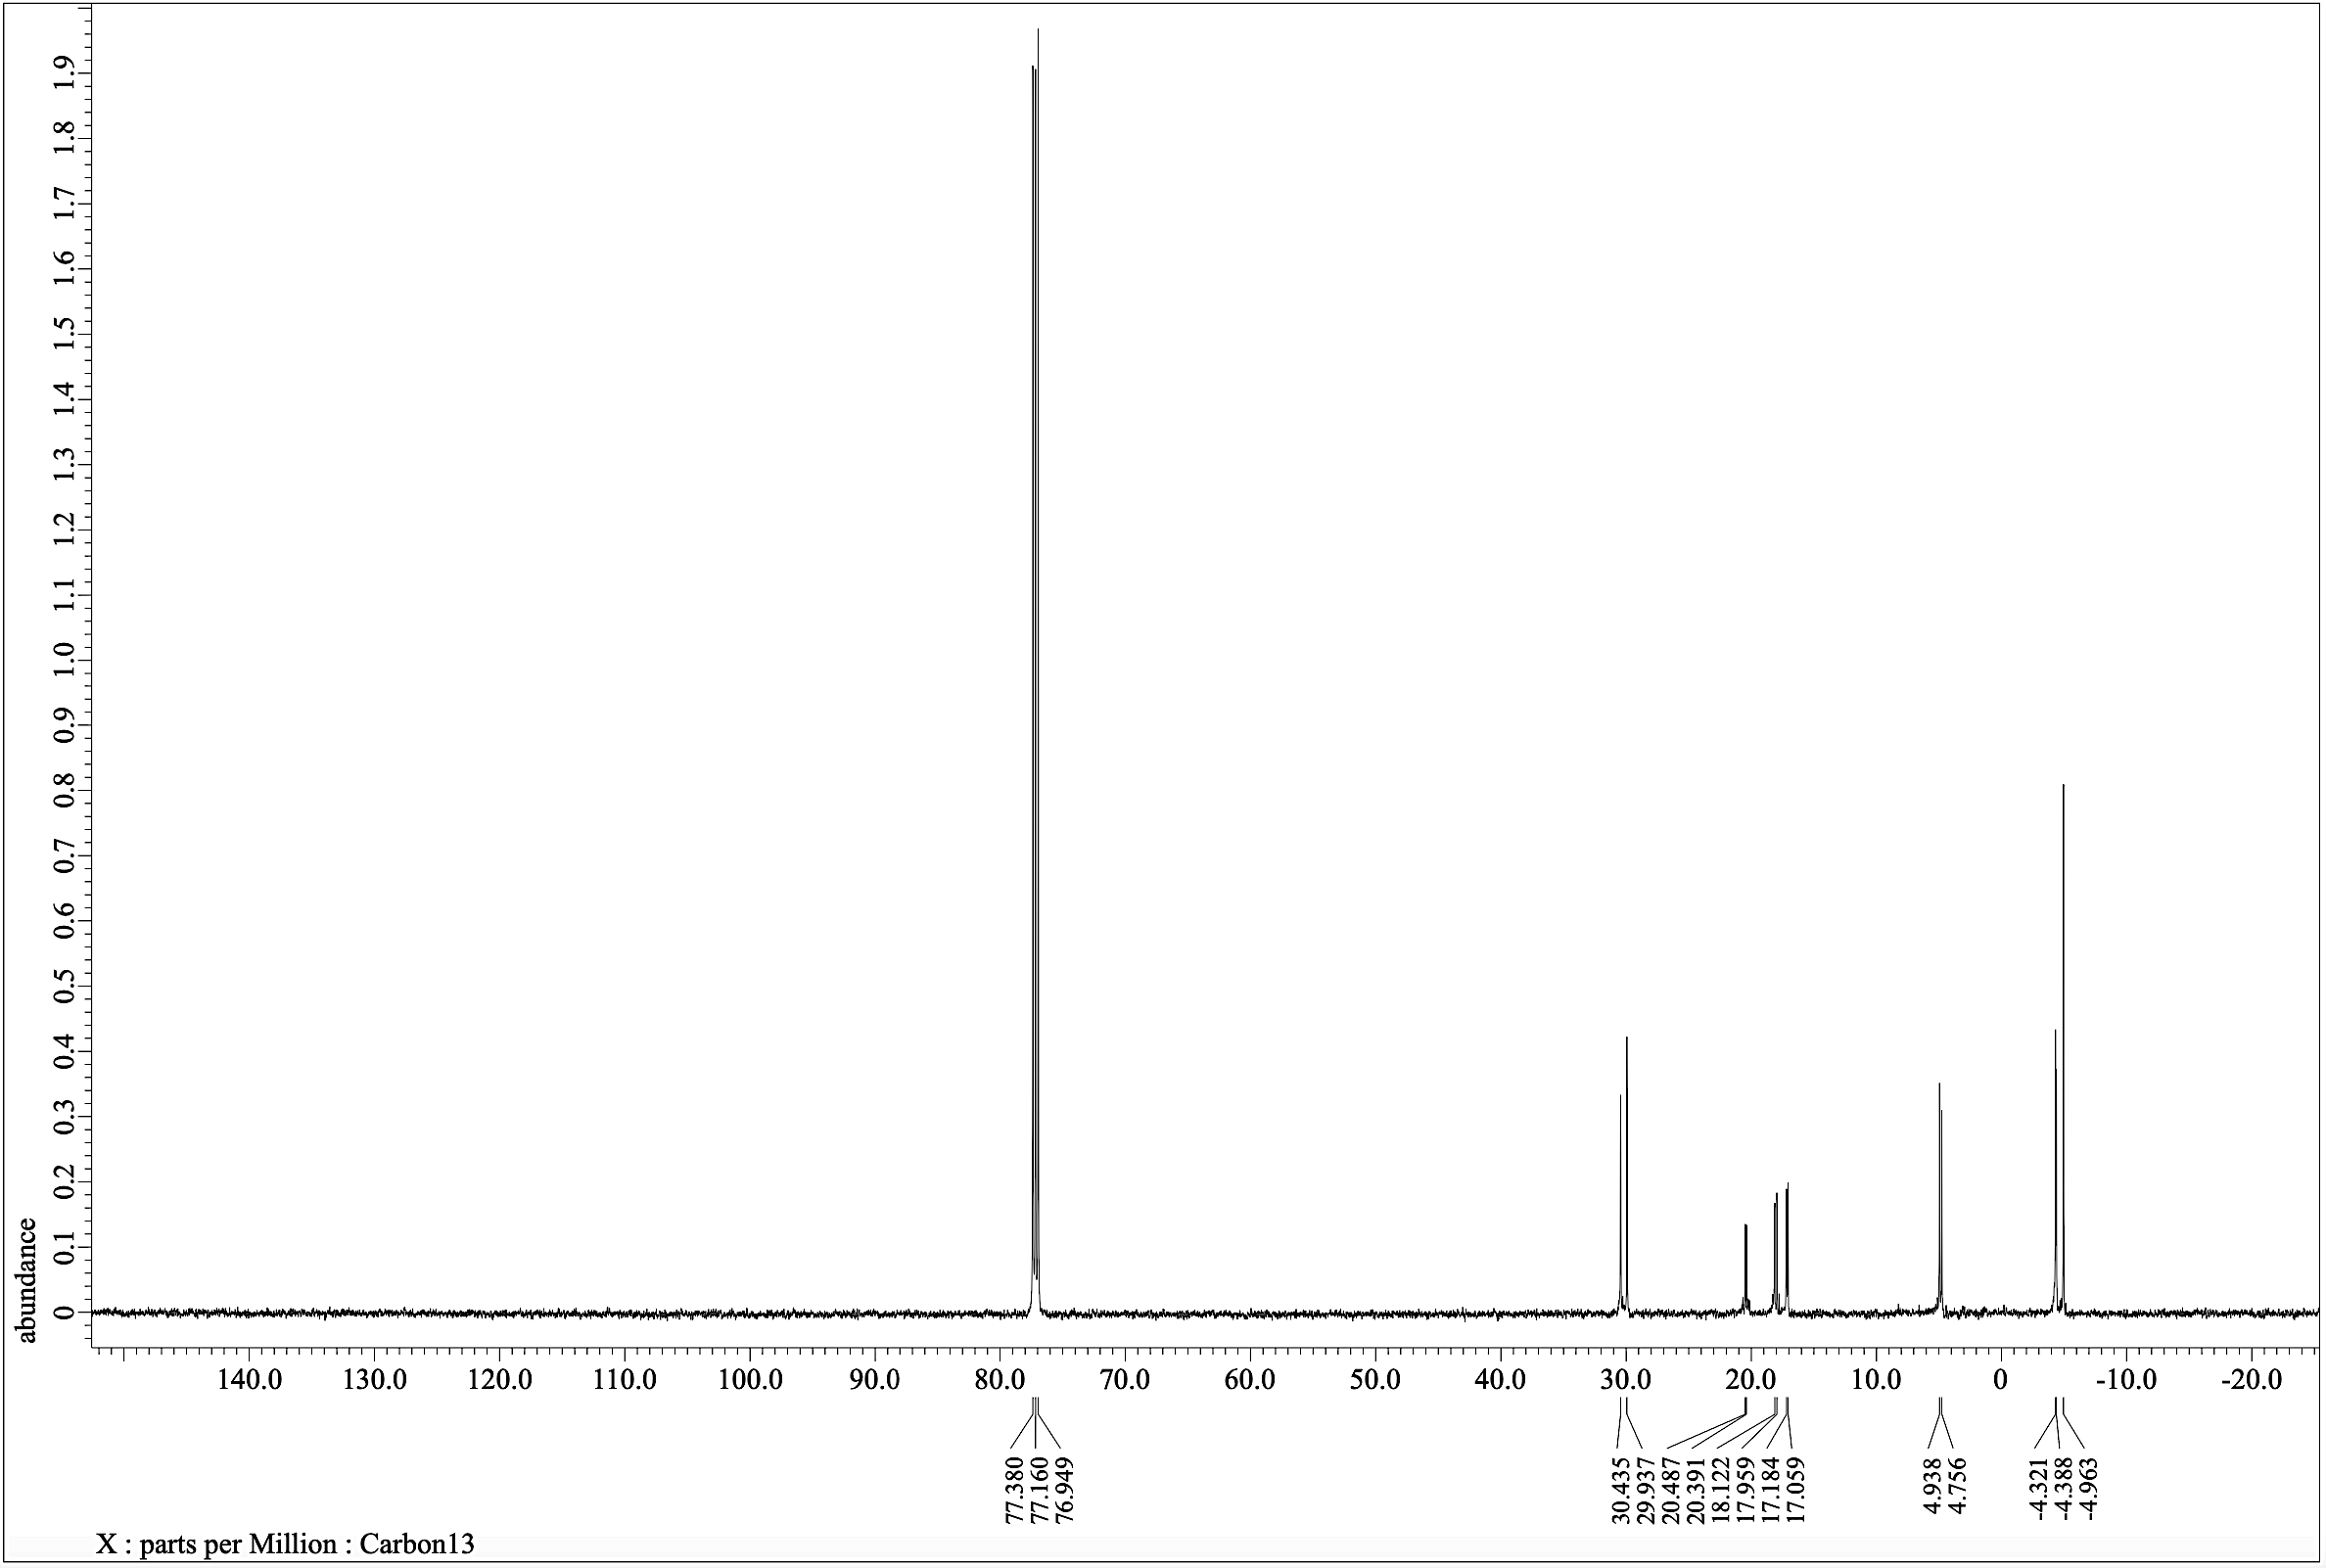
**

**13**

13C NMR (150.91 MHz, CDCl3)

**Figure S23: 13**C NMR spectrum for **13**.

**
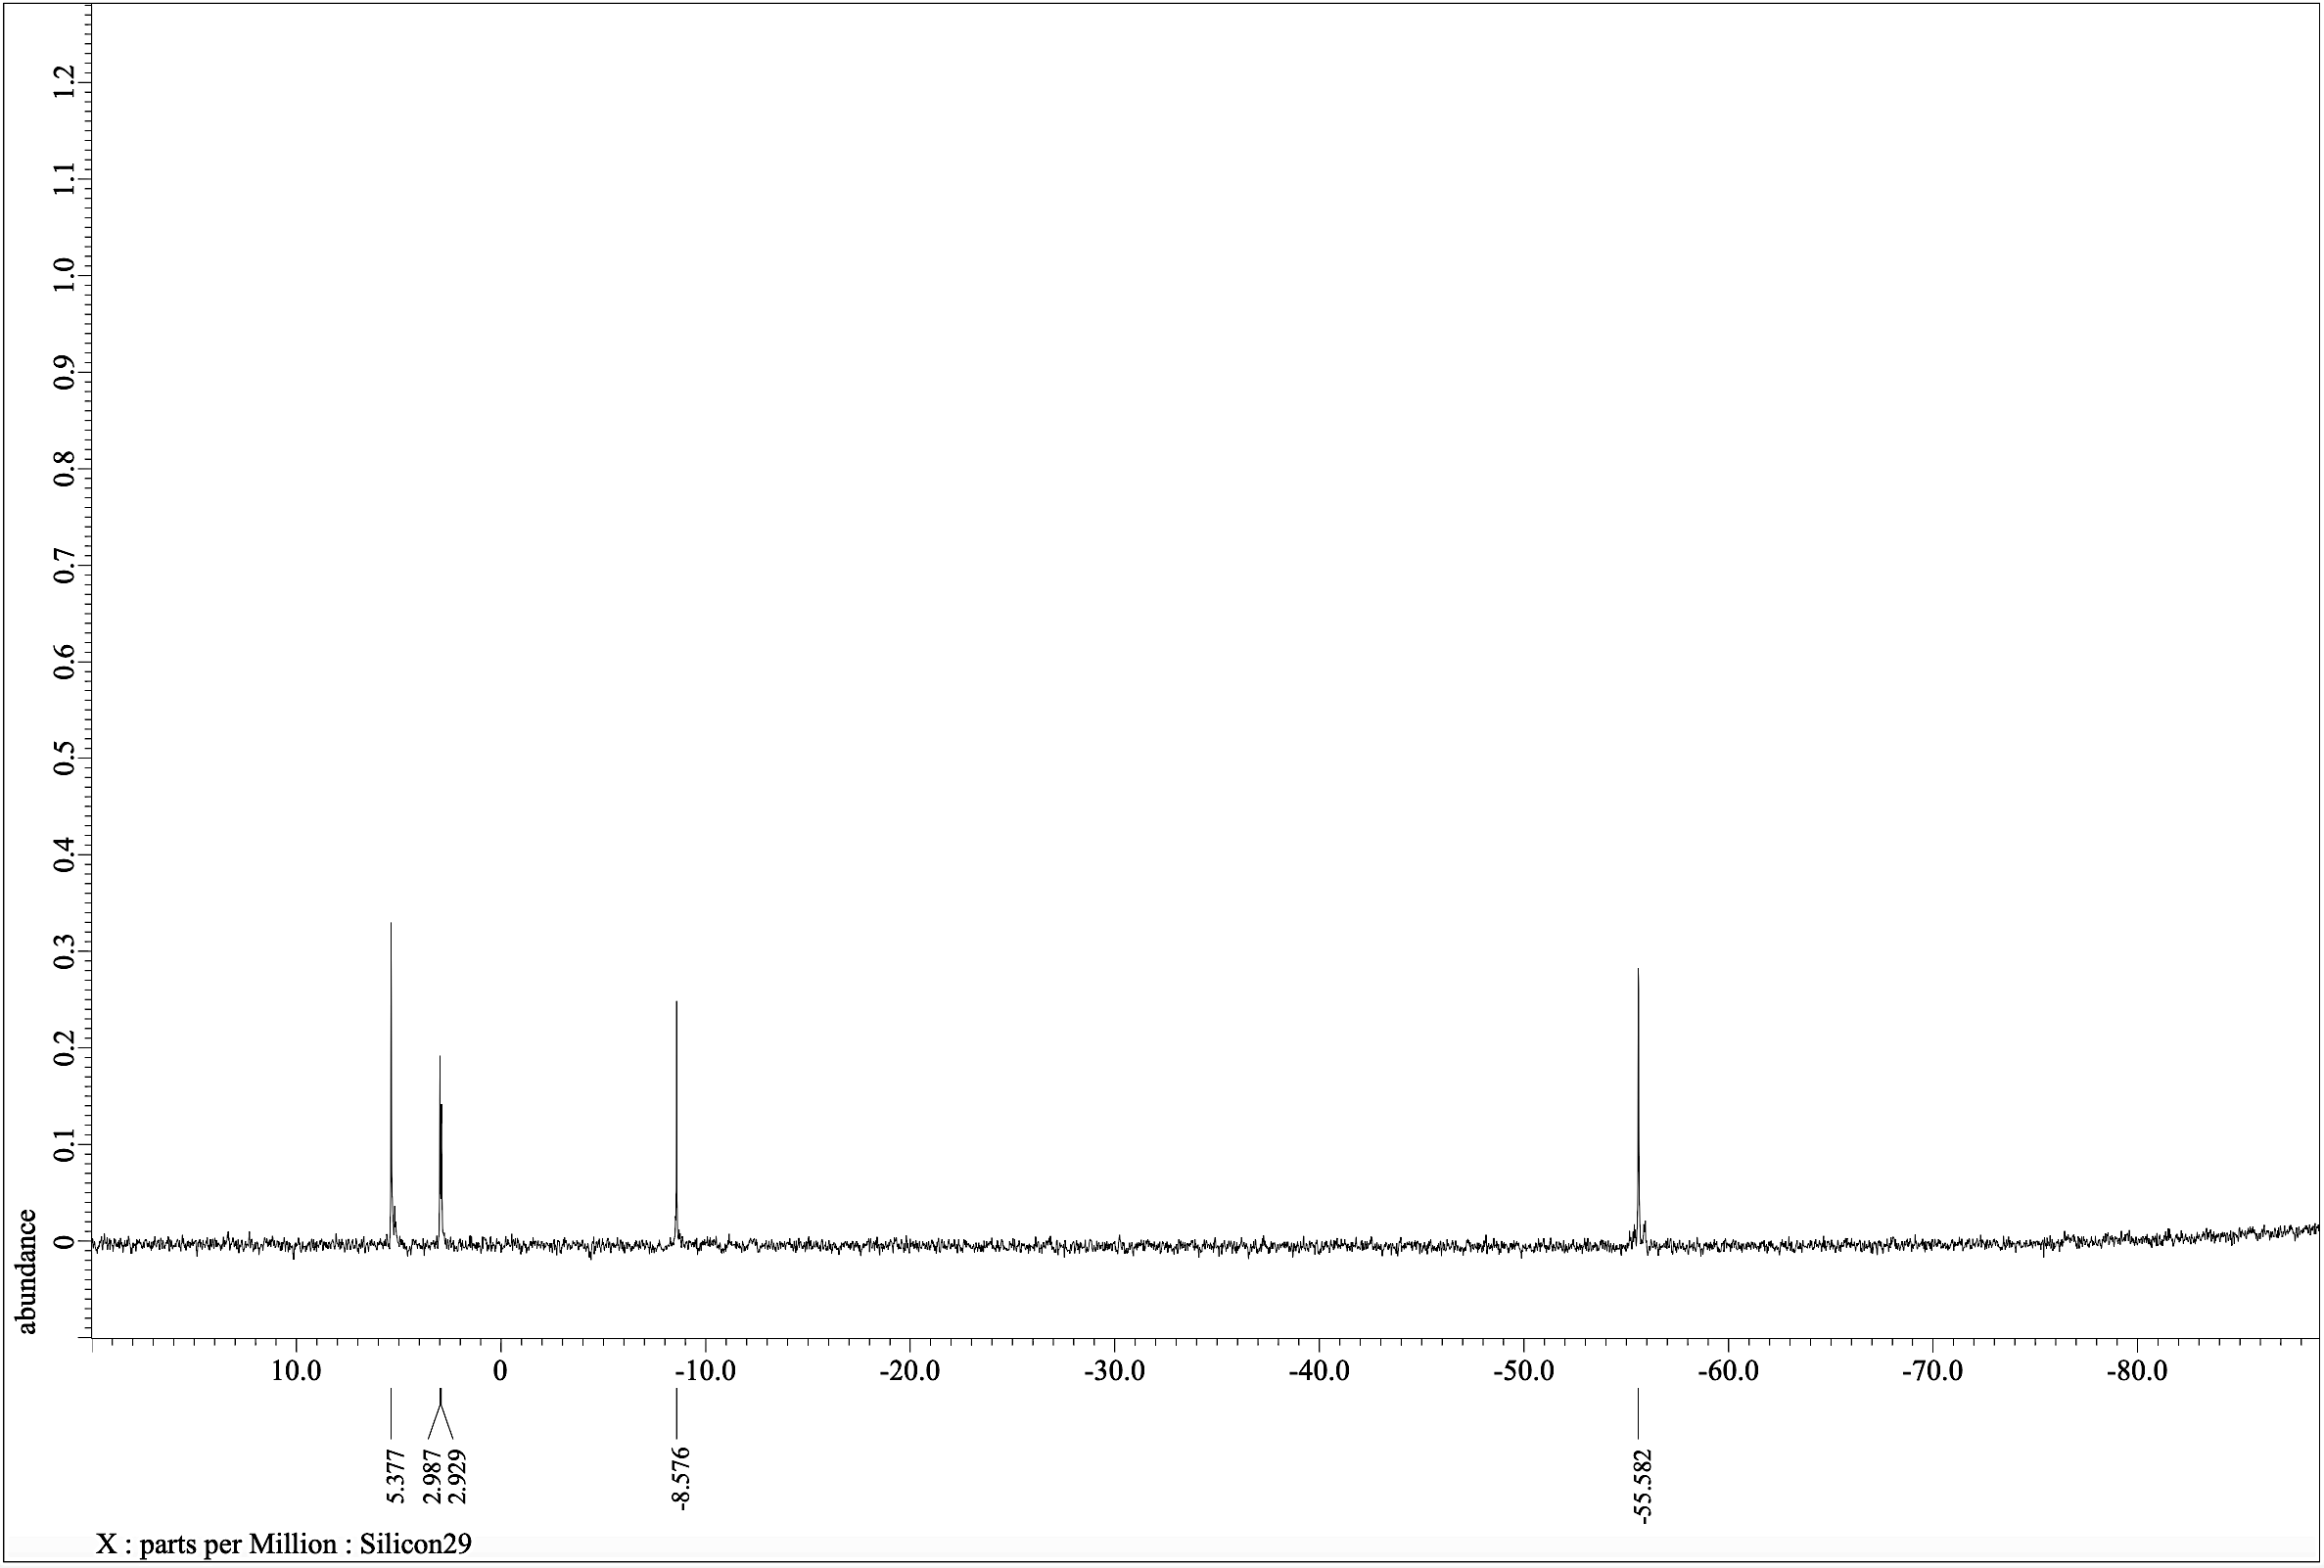
**

**13**

**-Si-**

**-Si-**

**-Si-**

**-Si-**

29Si NMR (119.24 MHz, CDCl3)

**Figure S24: 29**Si NMR spectrum for **13**.

**
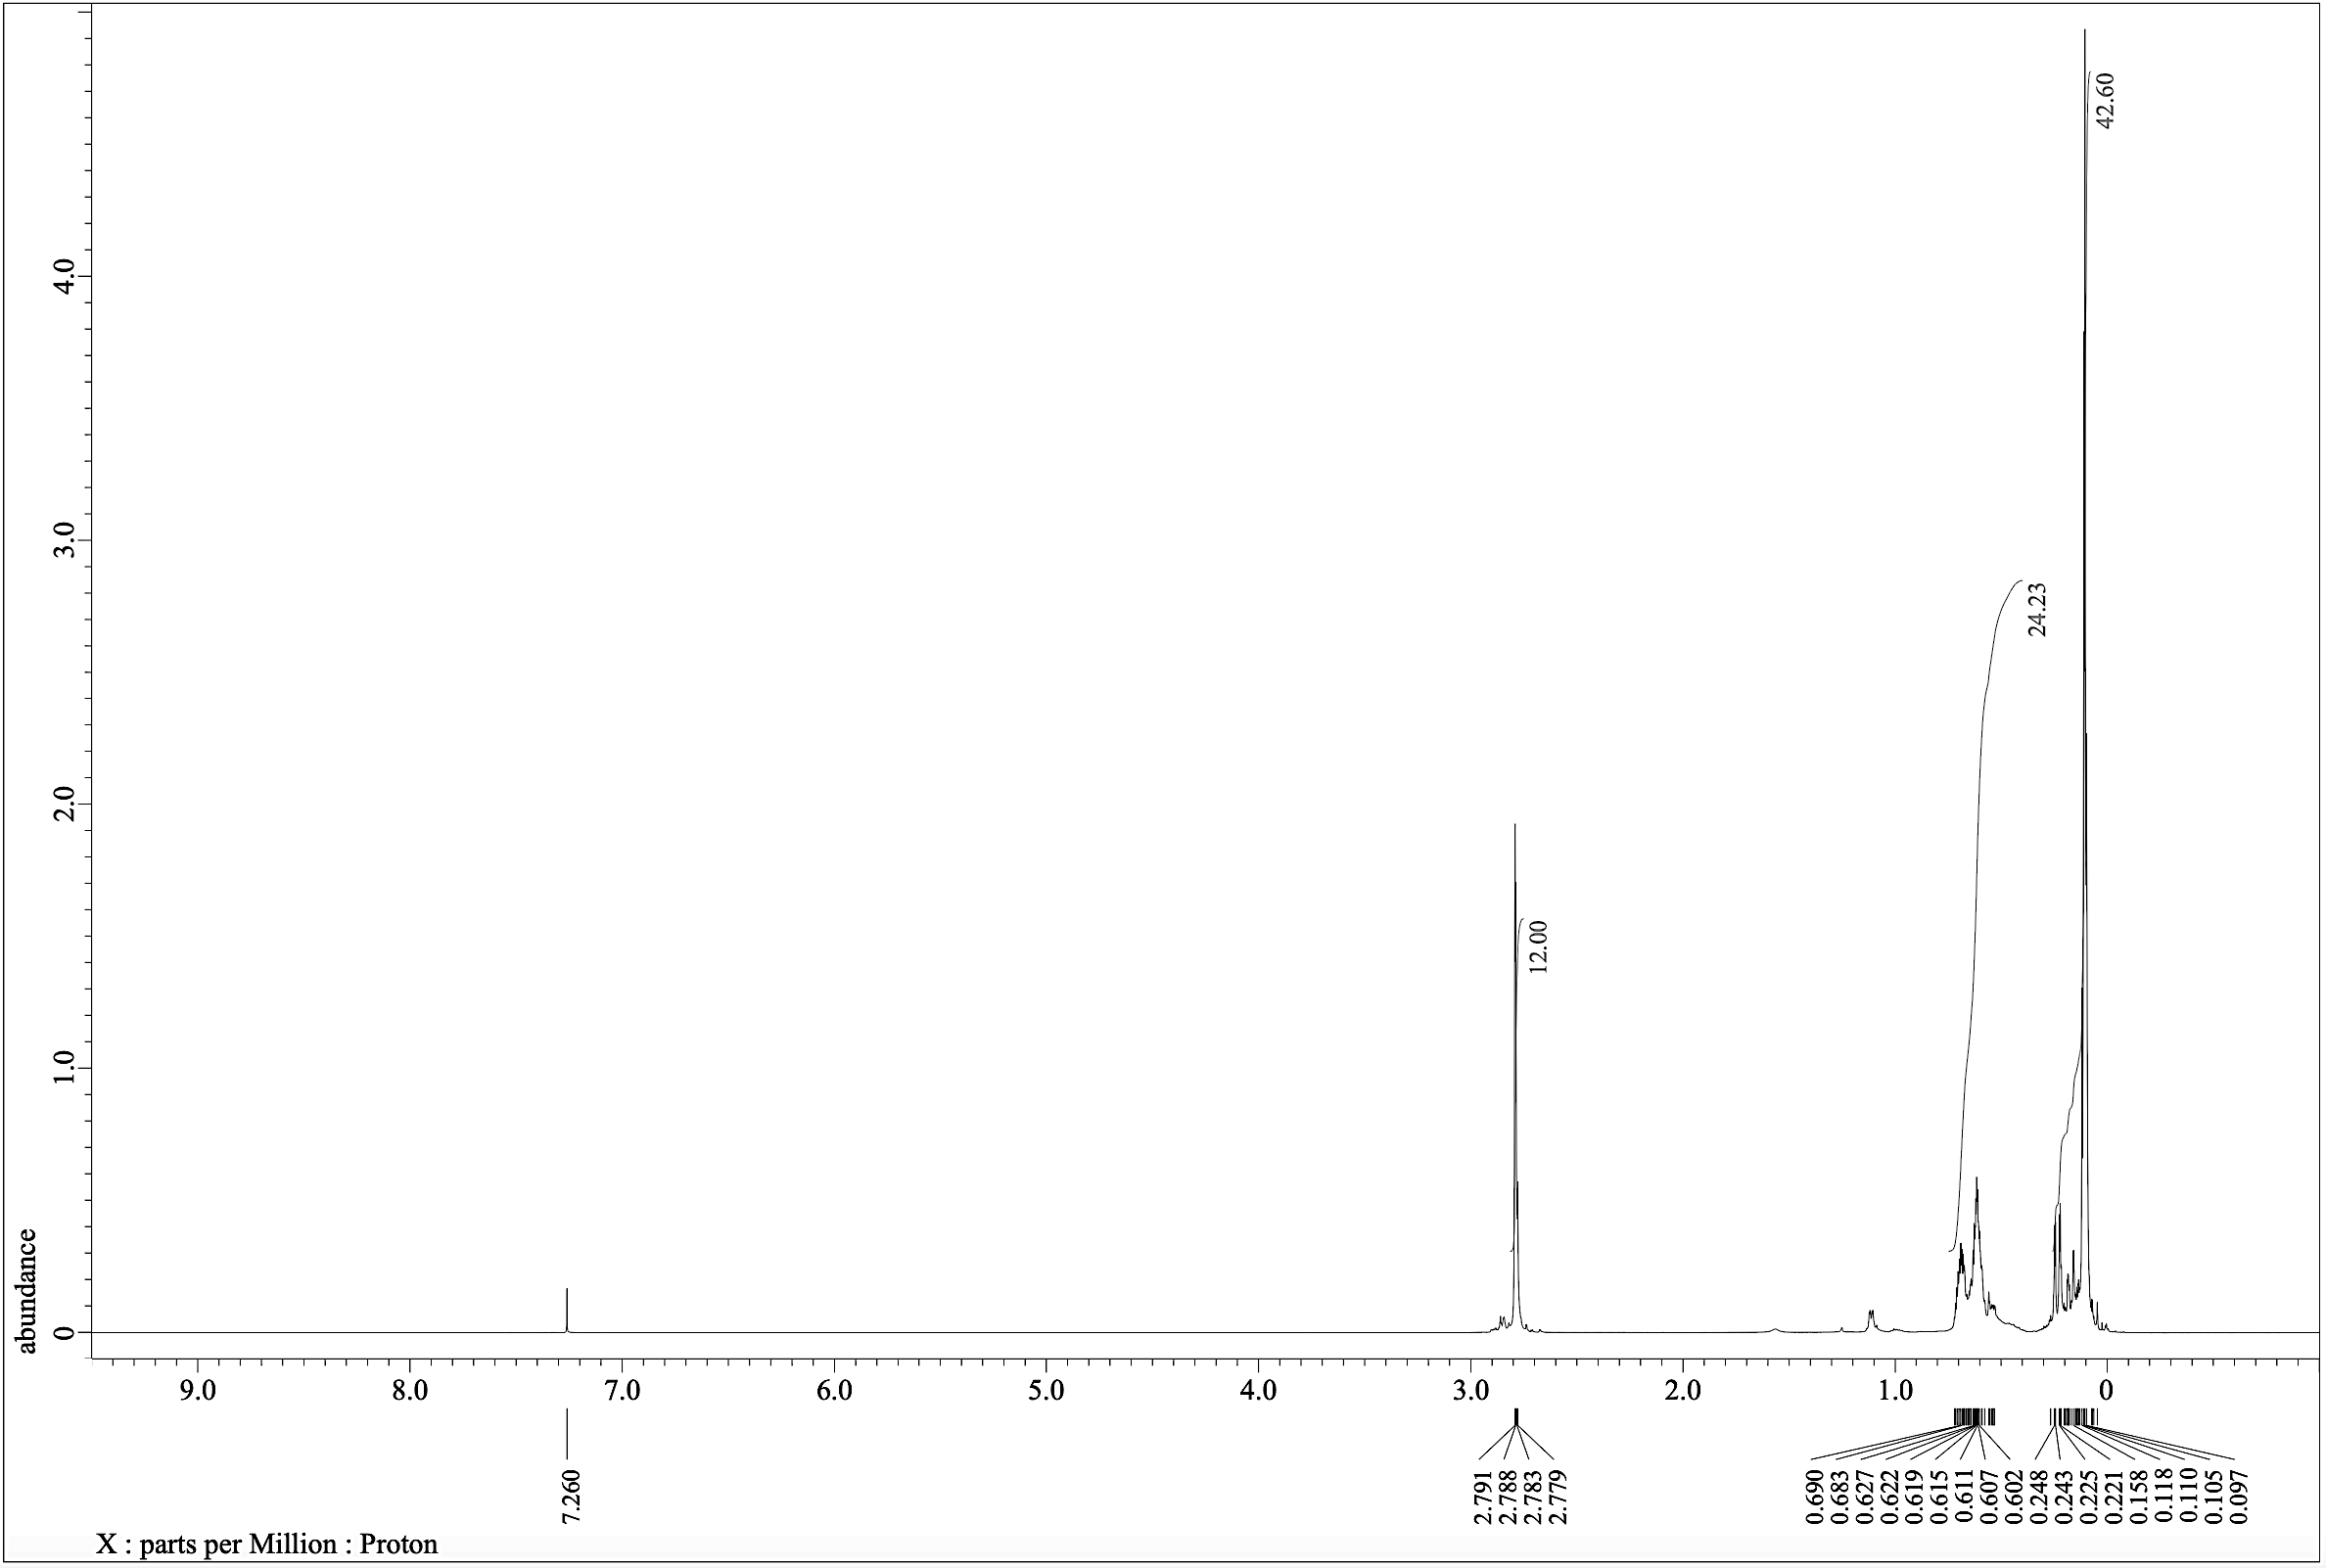
**

1H NMR (600.17 MHz, CDCl3)

**14**

**Figure S25: 1**H NMR spectrum for **14**.

**
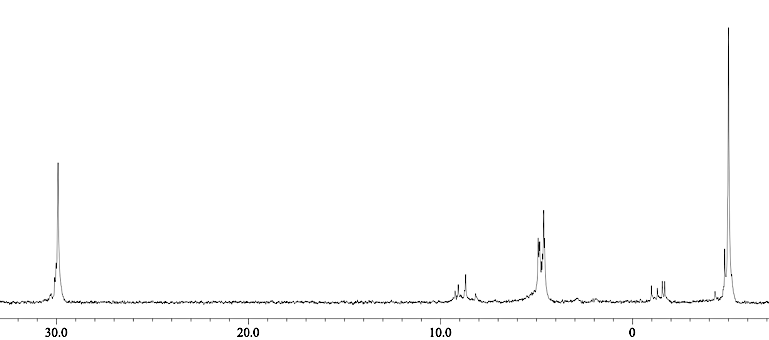

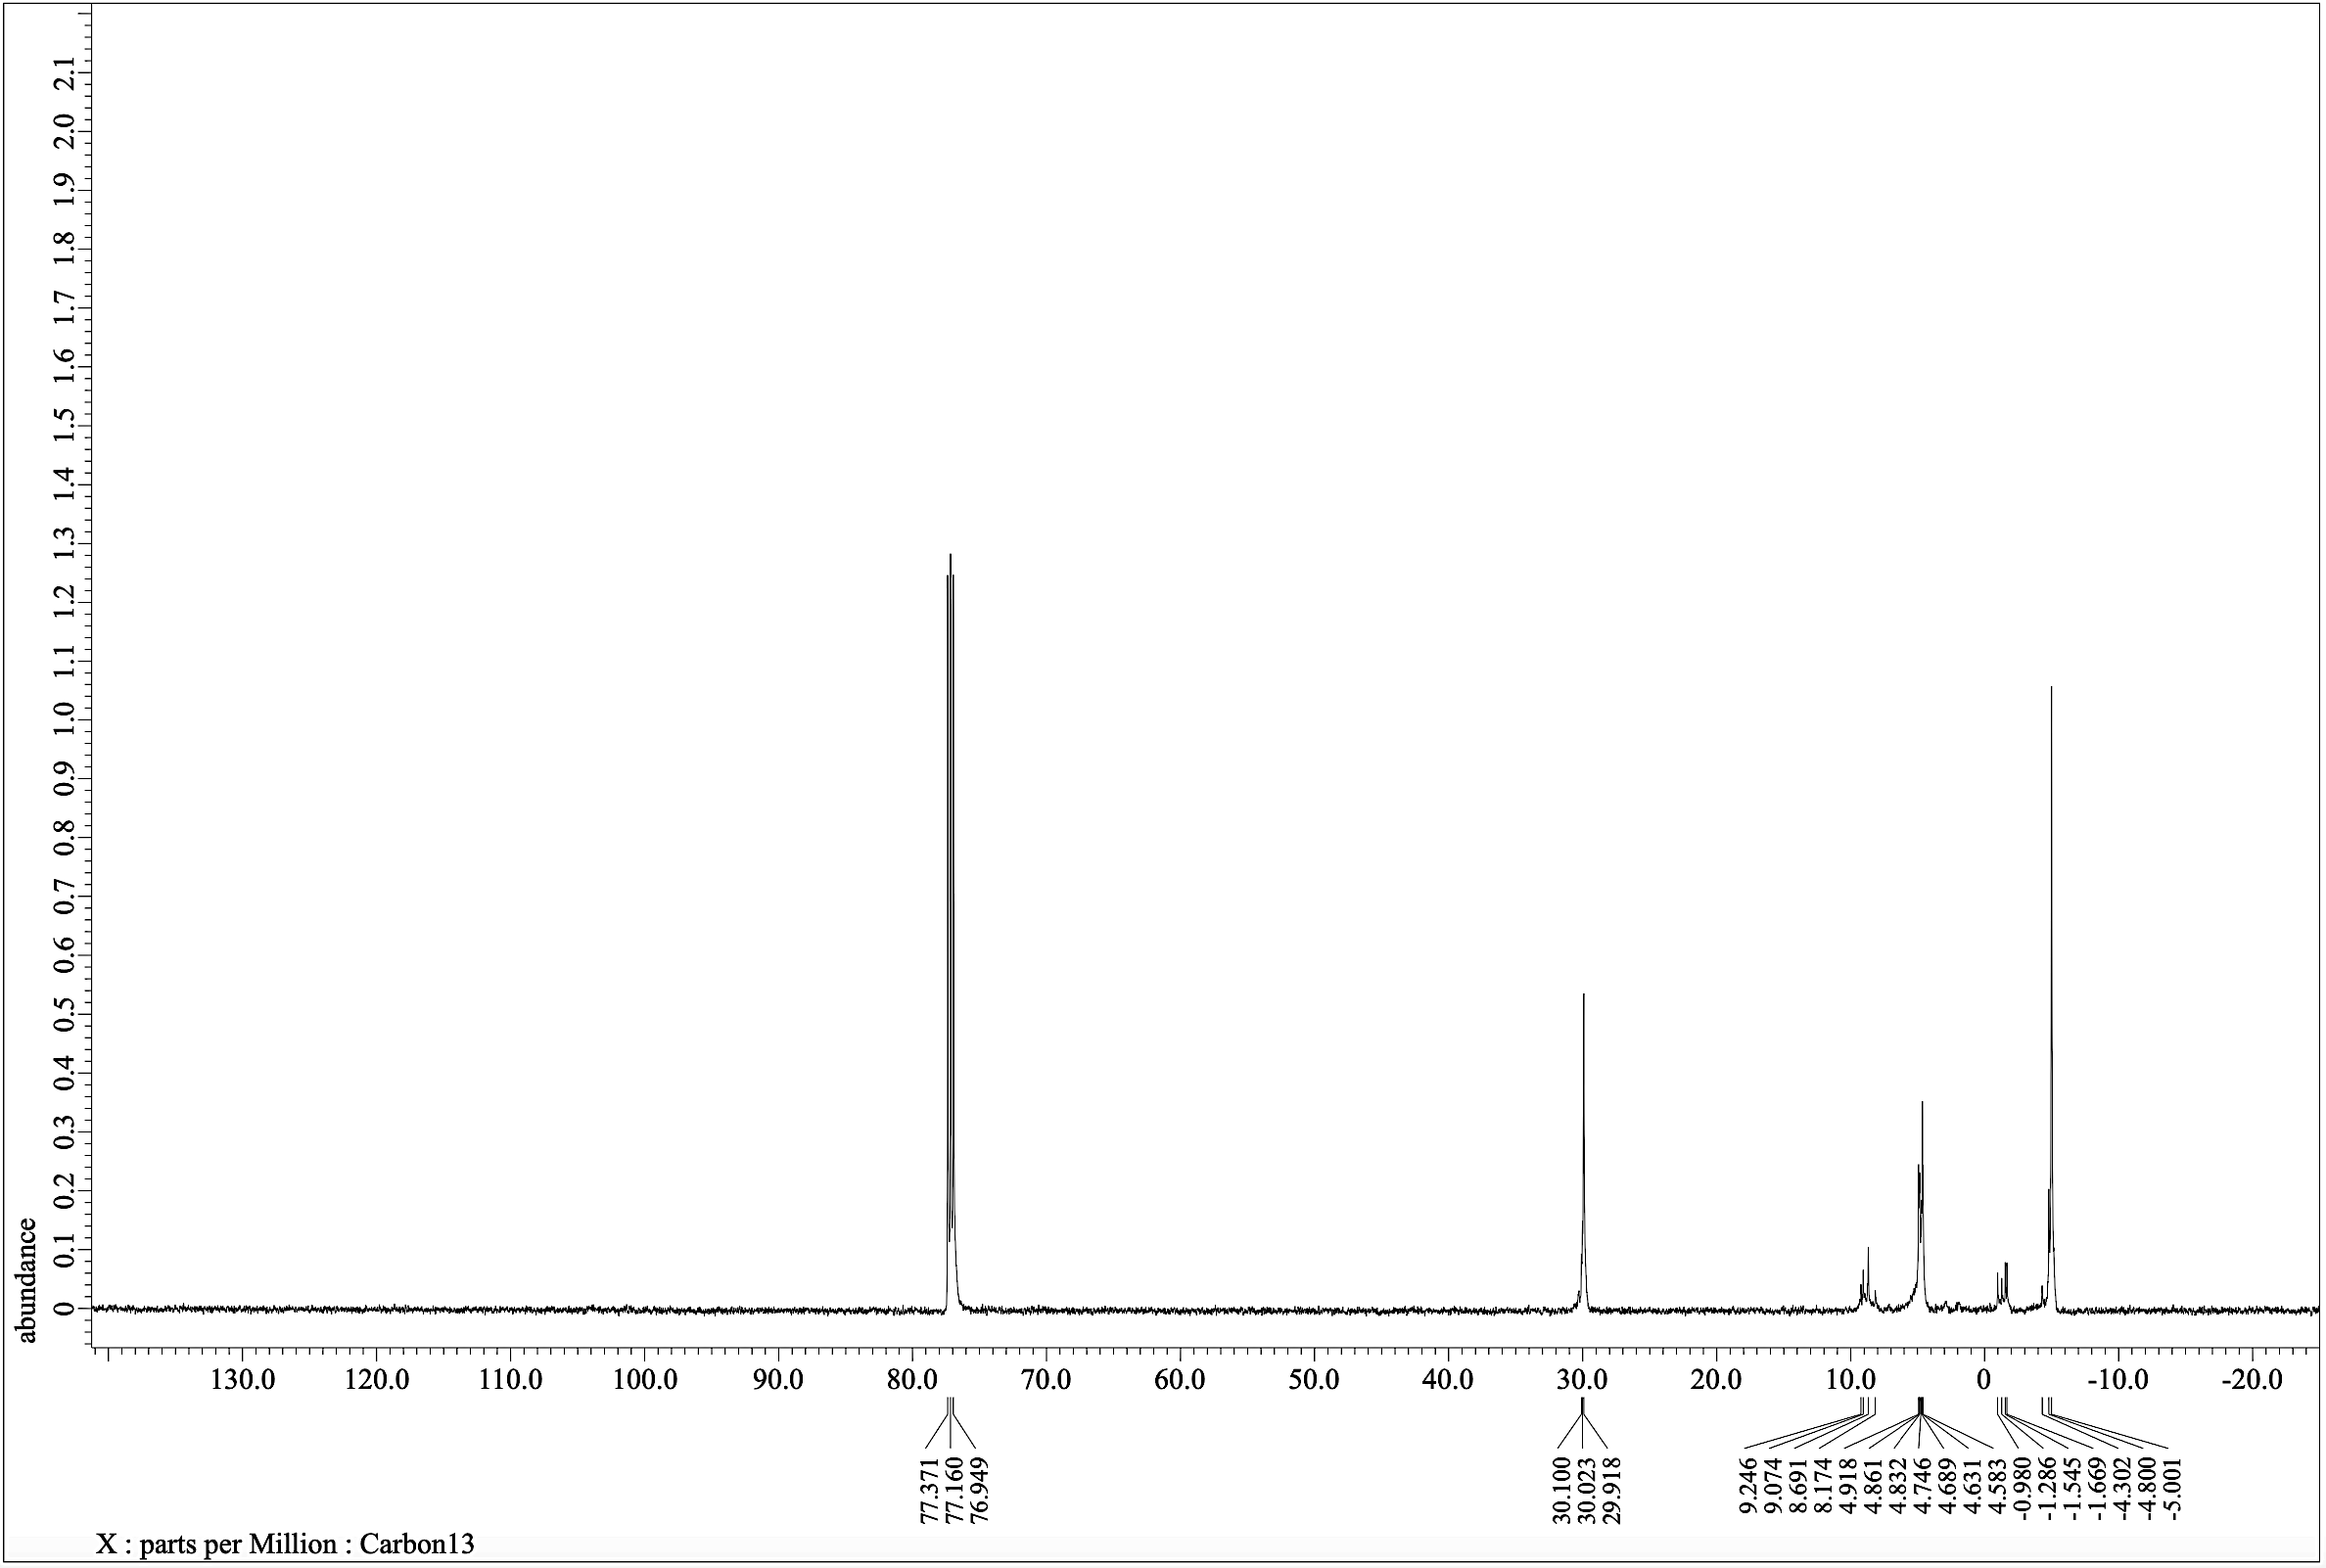
**

**14**

13C NMR (150.91 MHz, CDCl3)

**Figure S26: 13**C NMR spectrum for **14**.

**
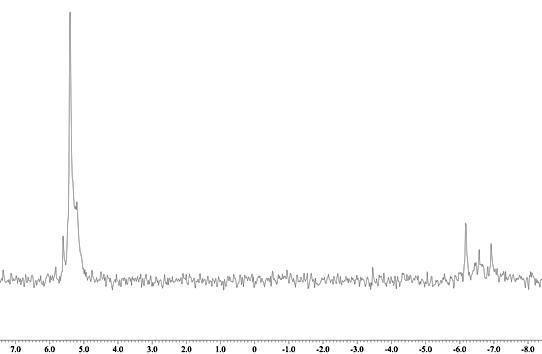

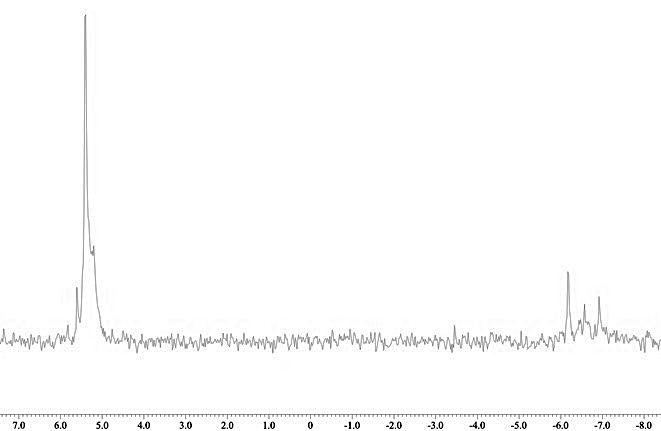

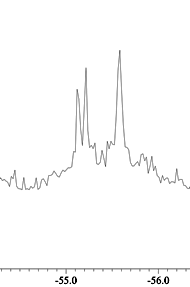

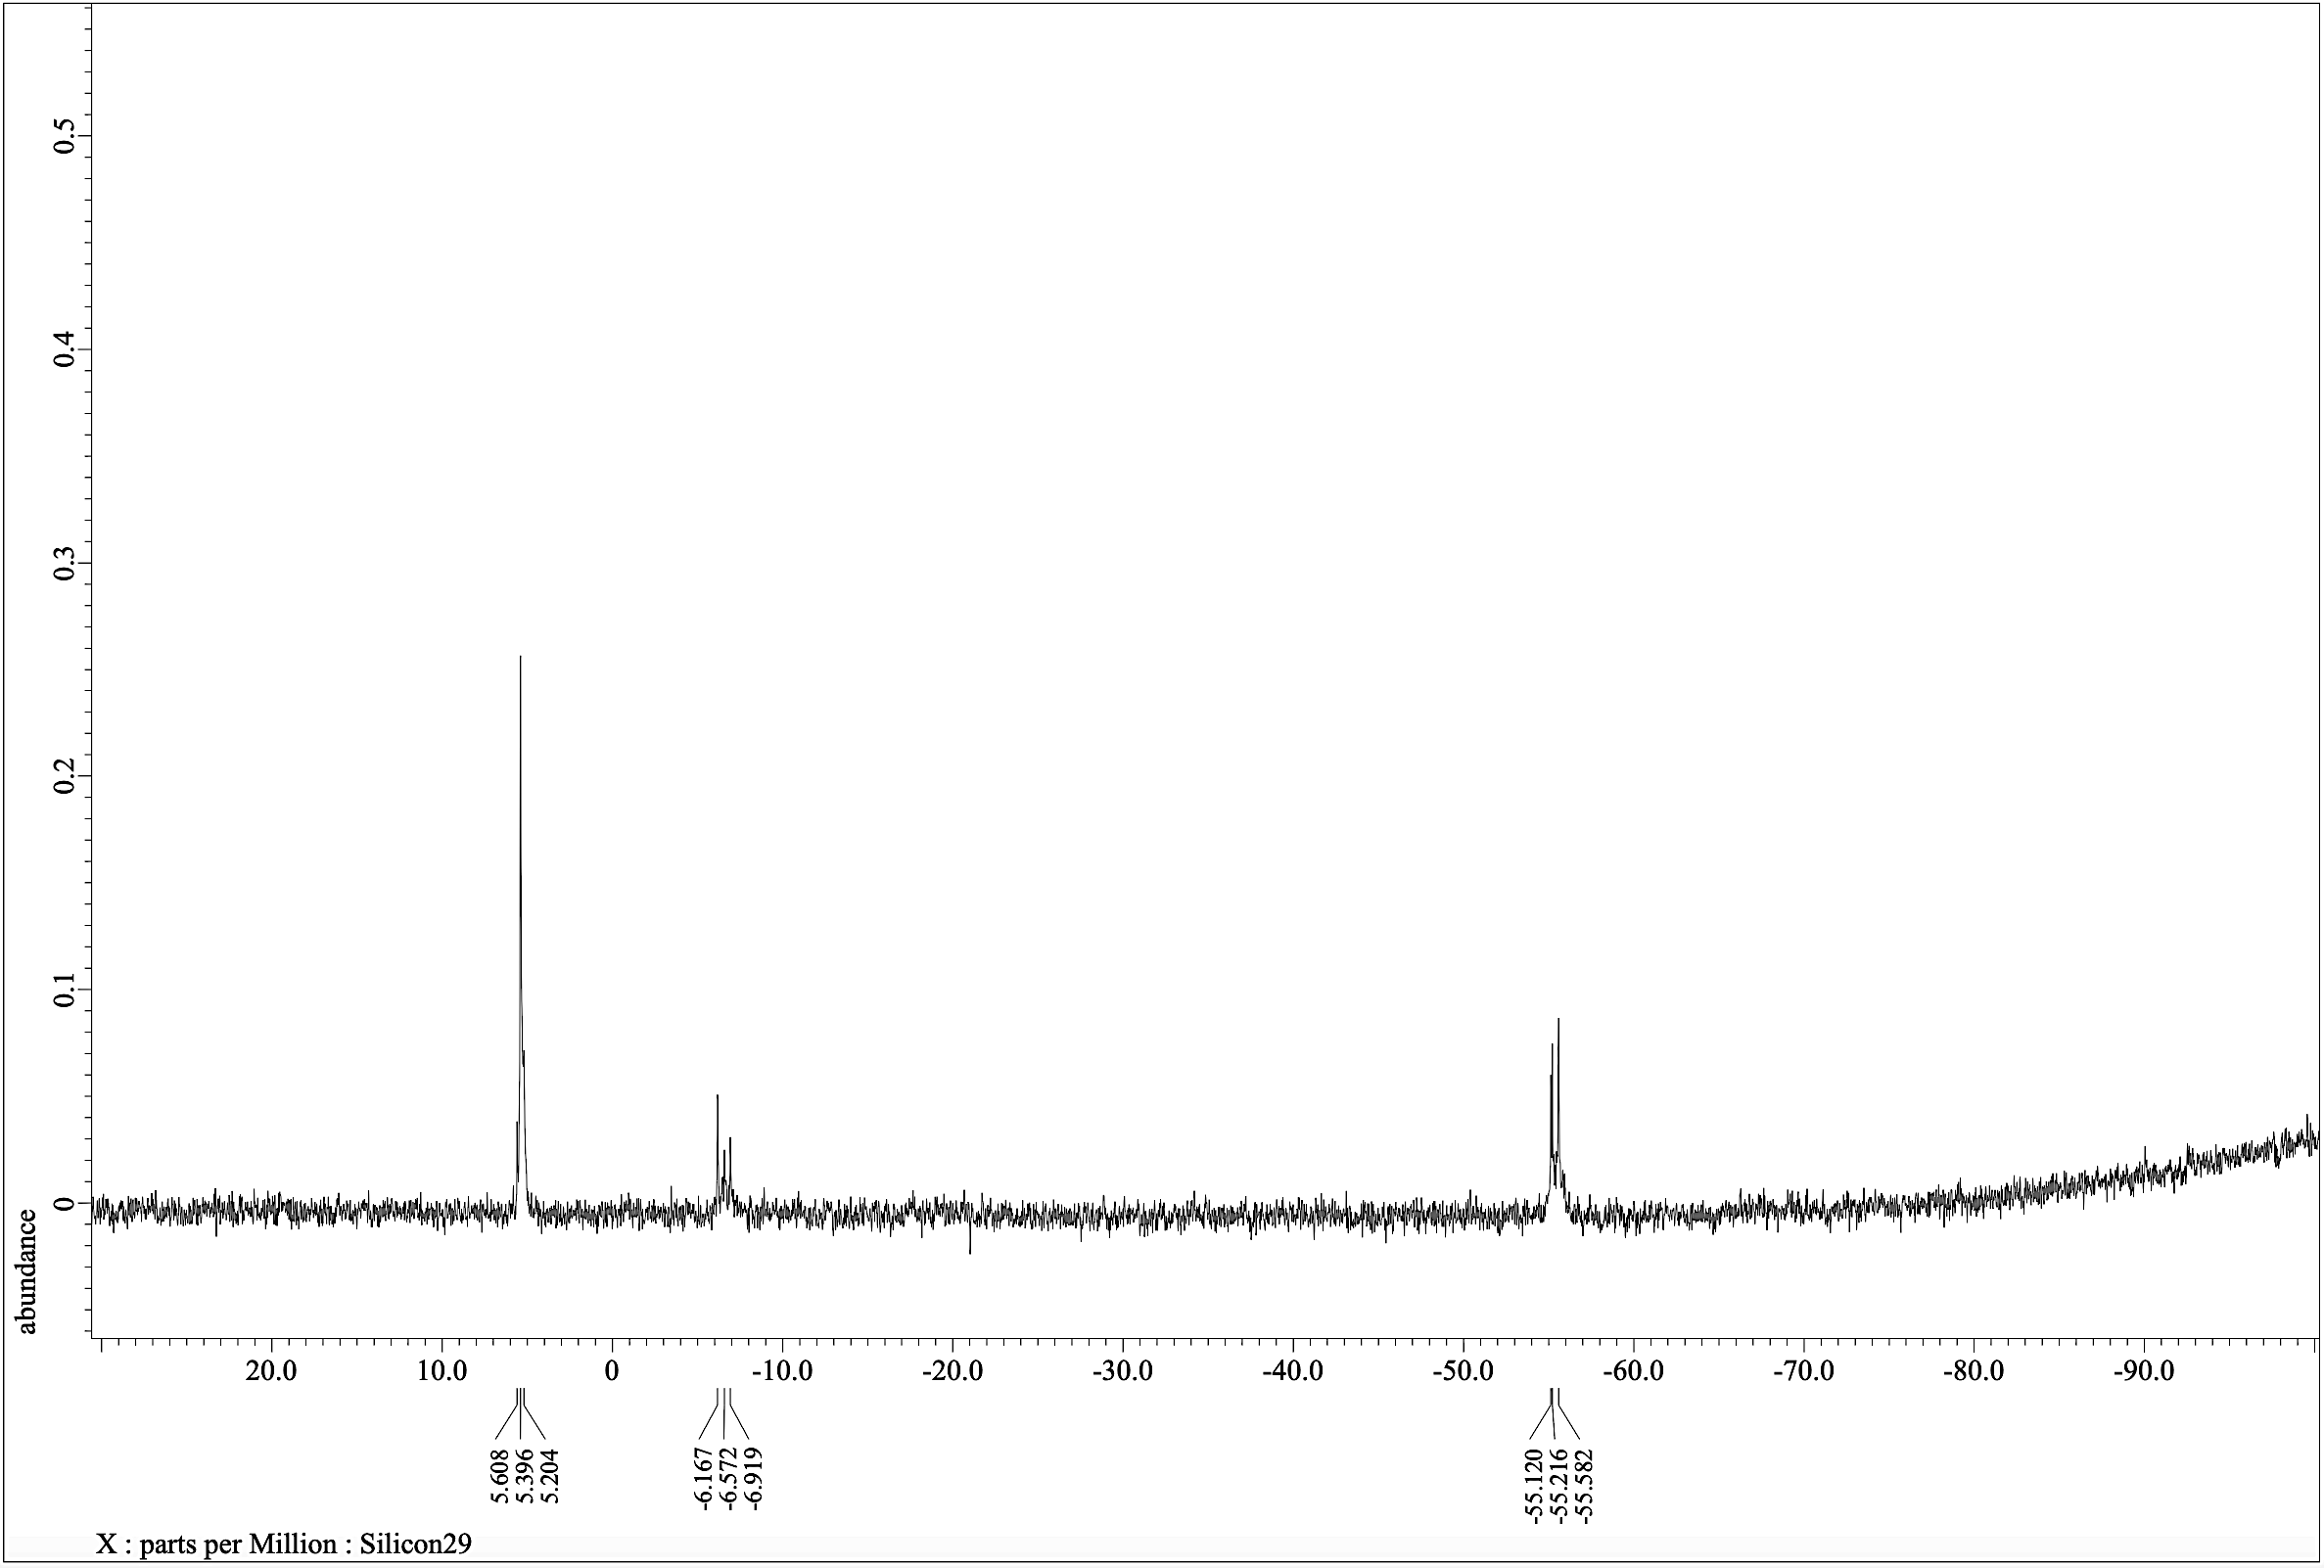
**

29Si NMR (119.24 MHz, CDCl3)

**-Si-**

**-Si-**

**-Si-**

**14**

**Figure S27: 29**Si NMR spectrum for **14**.

**
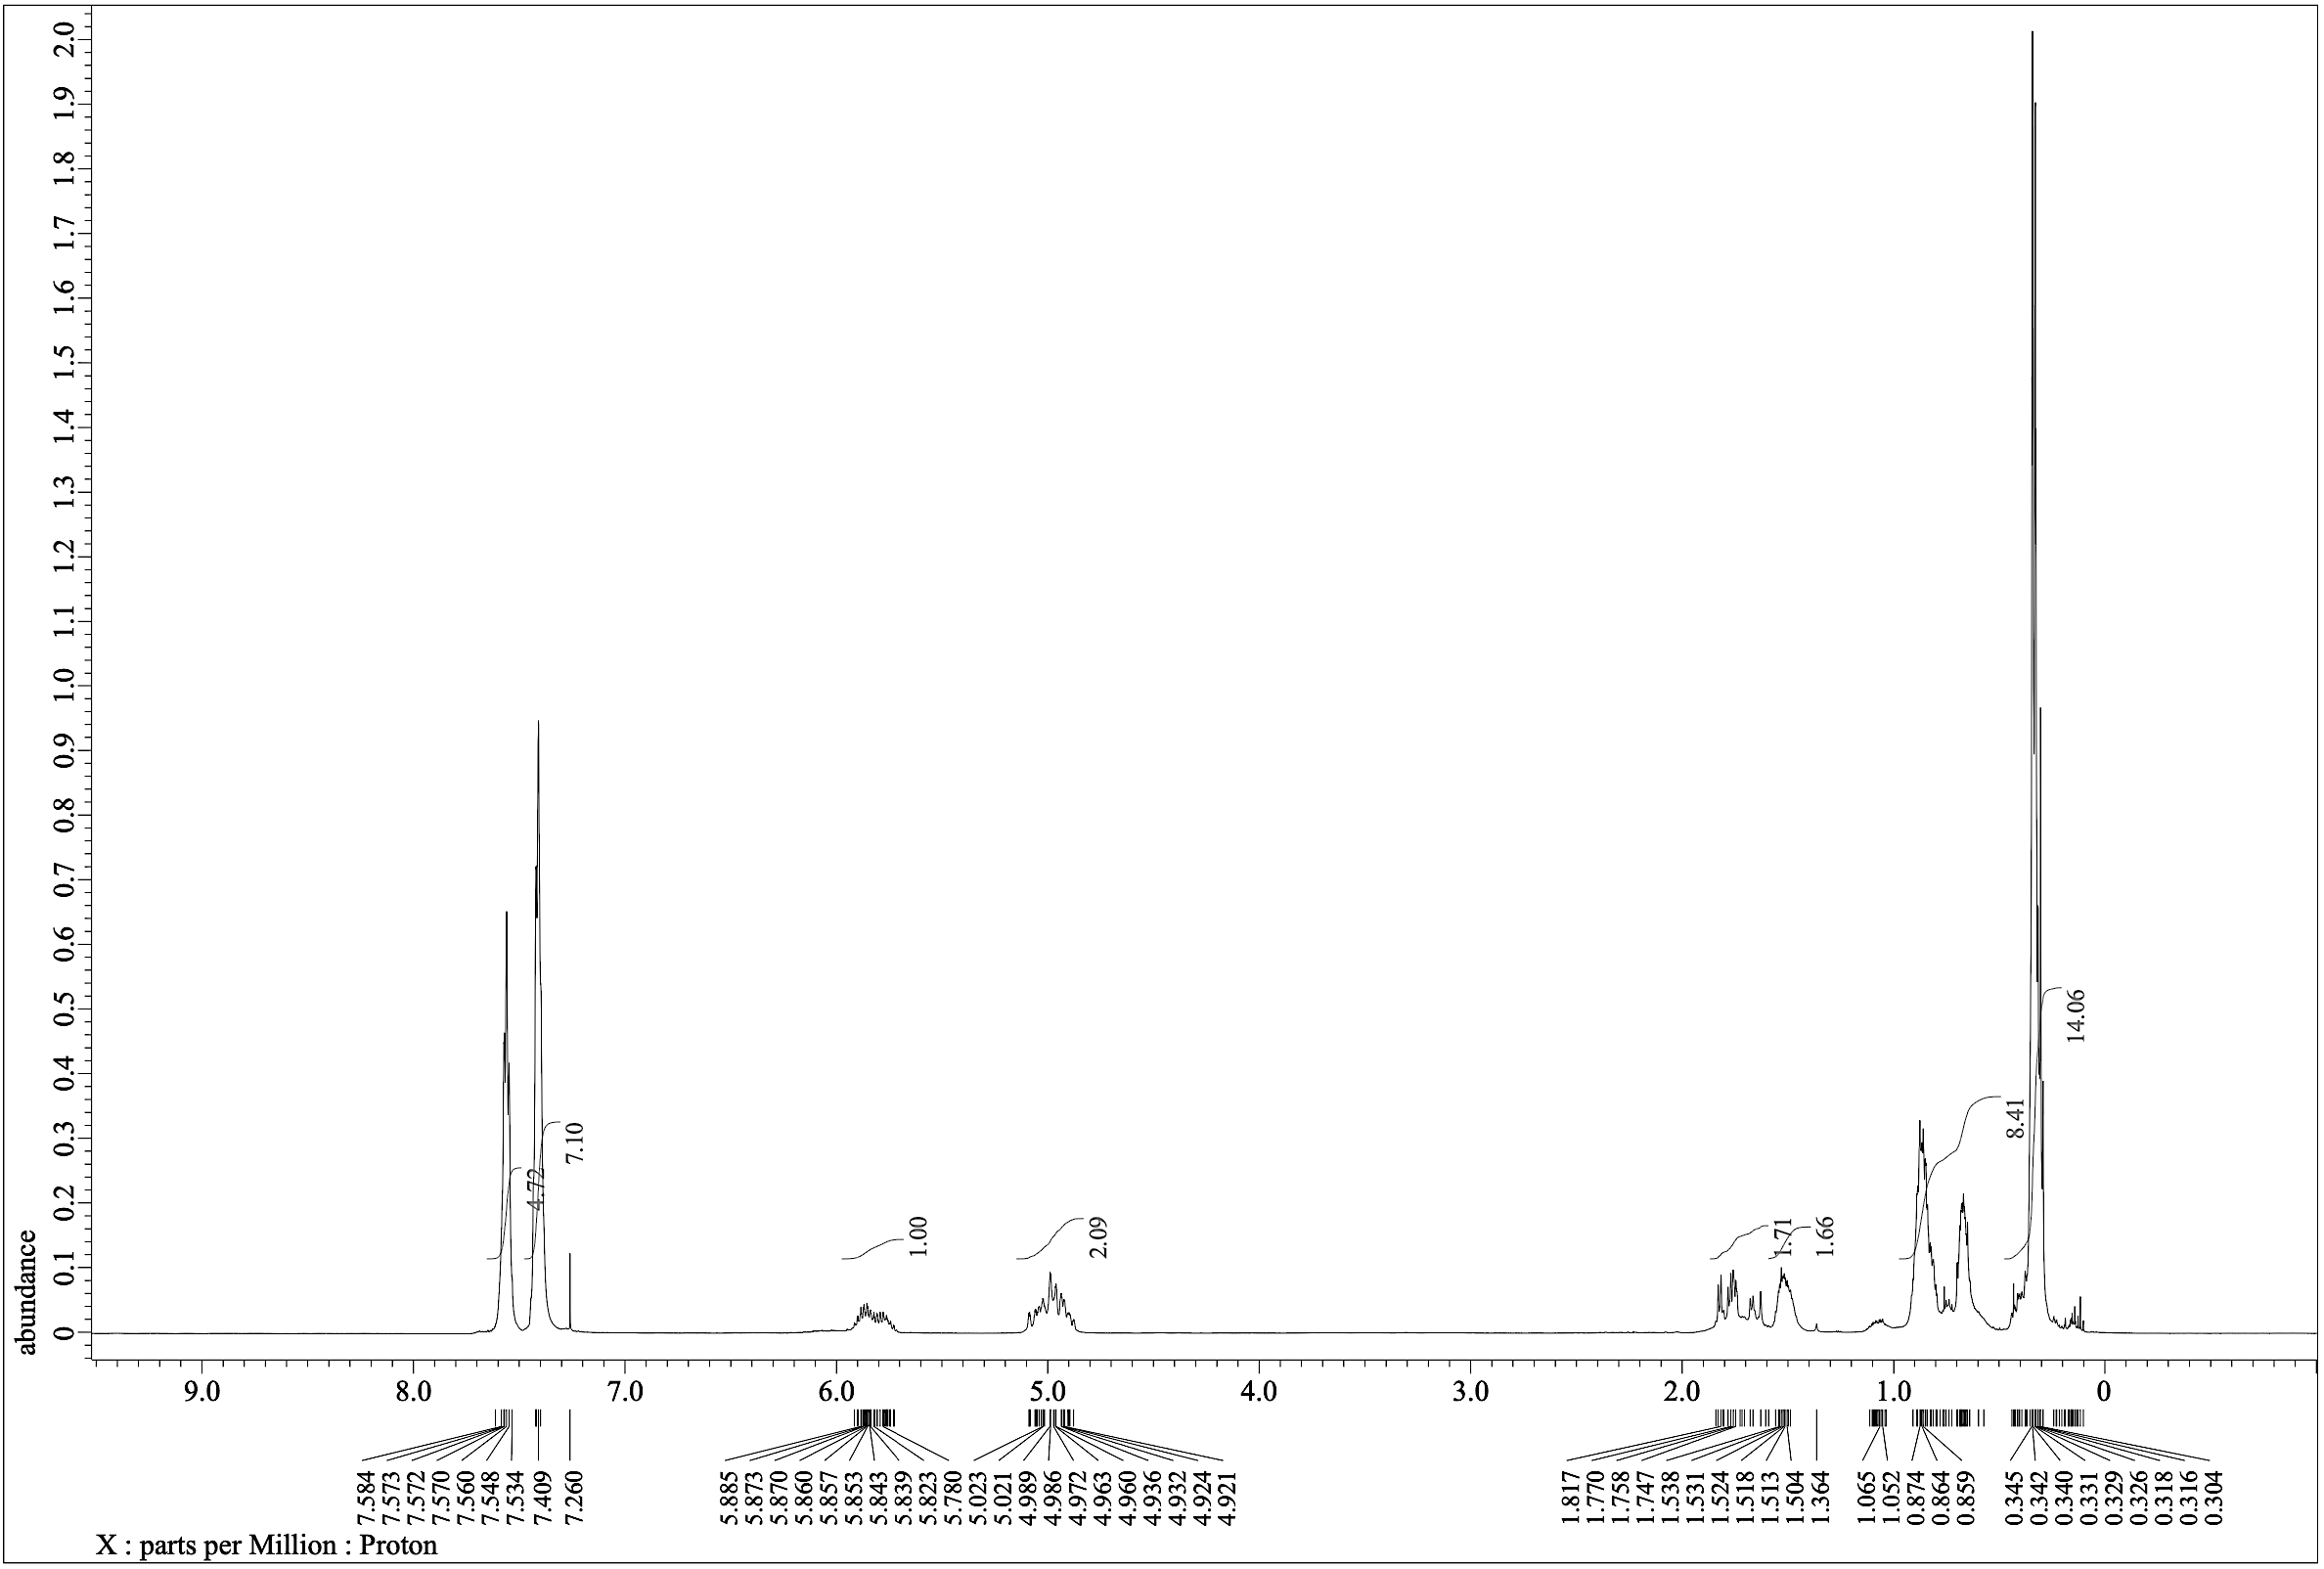
**

1H NMR (600.17 MHz, CDCl3)

**Figure S28: 1**H NMR spectrum for **15**.


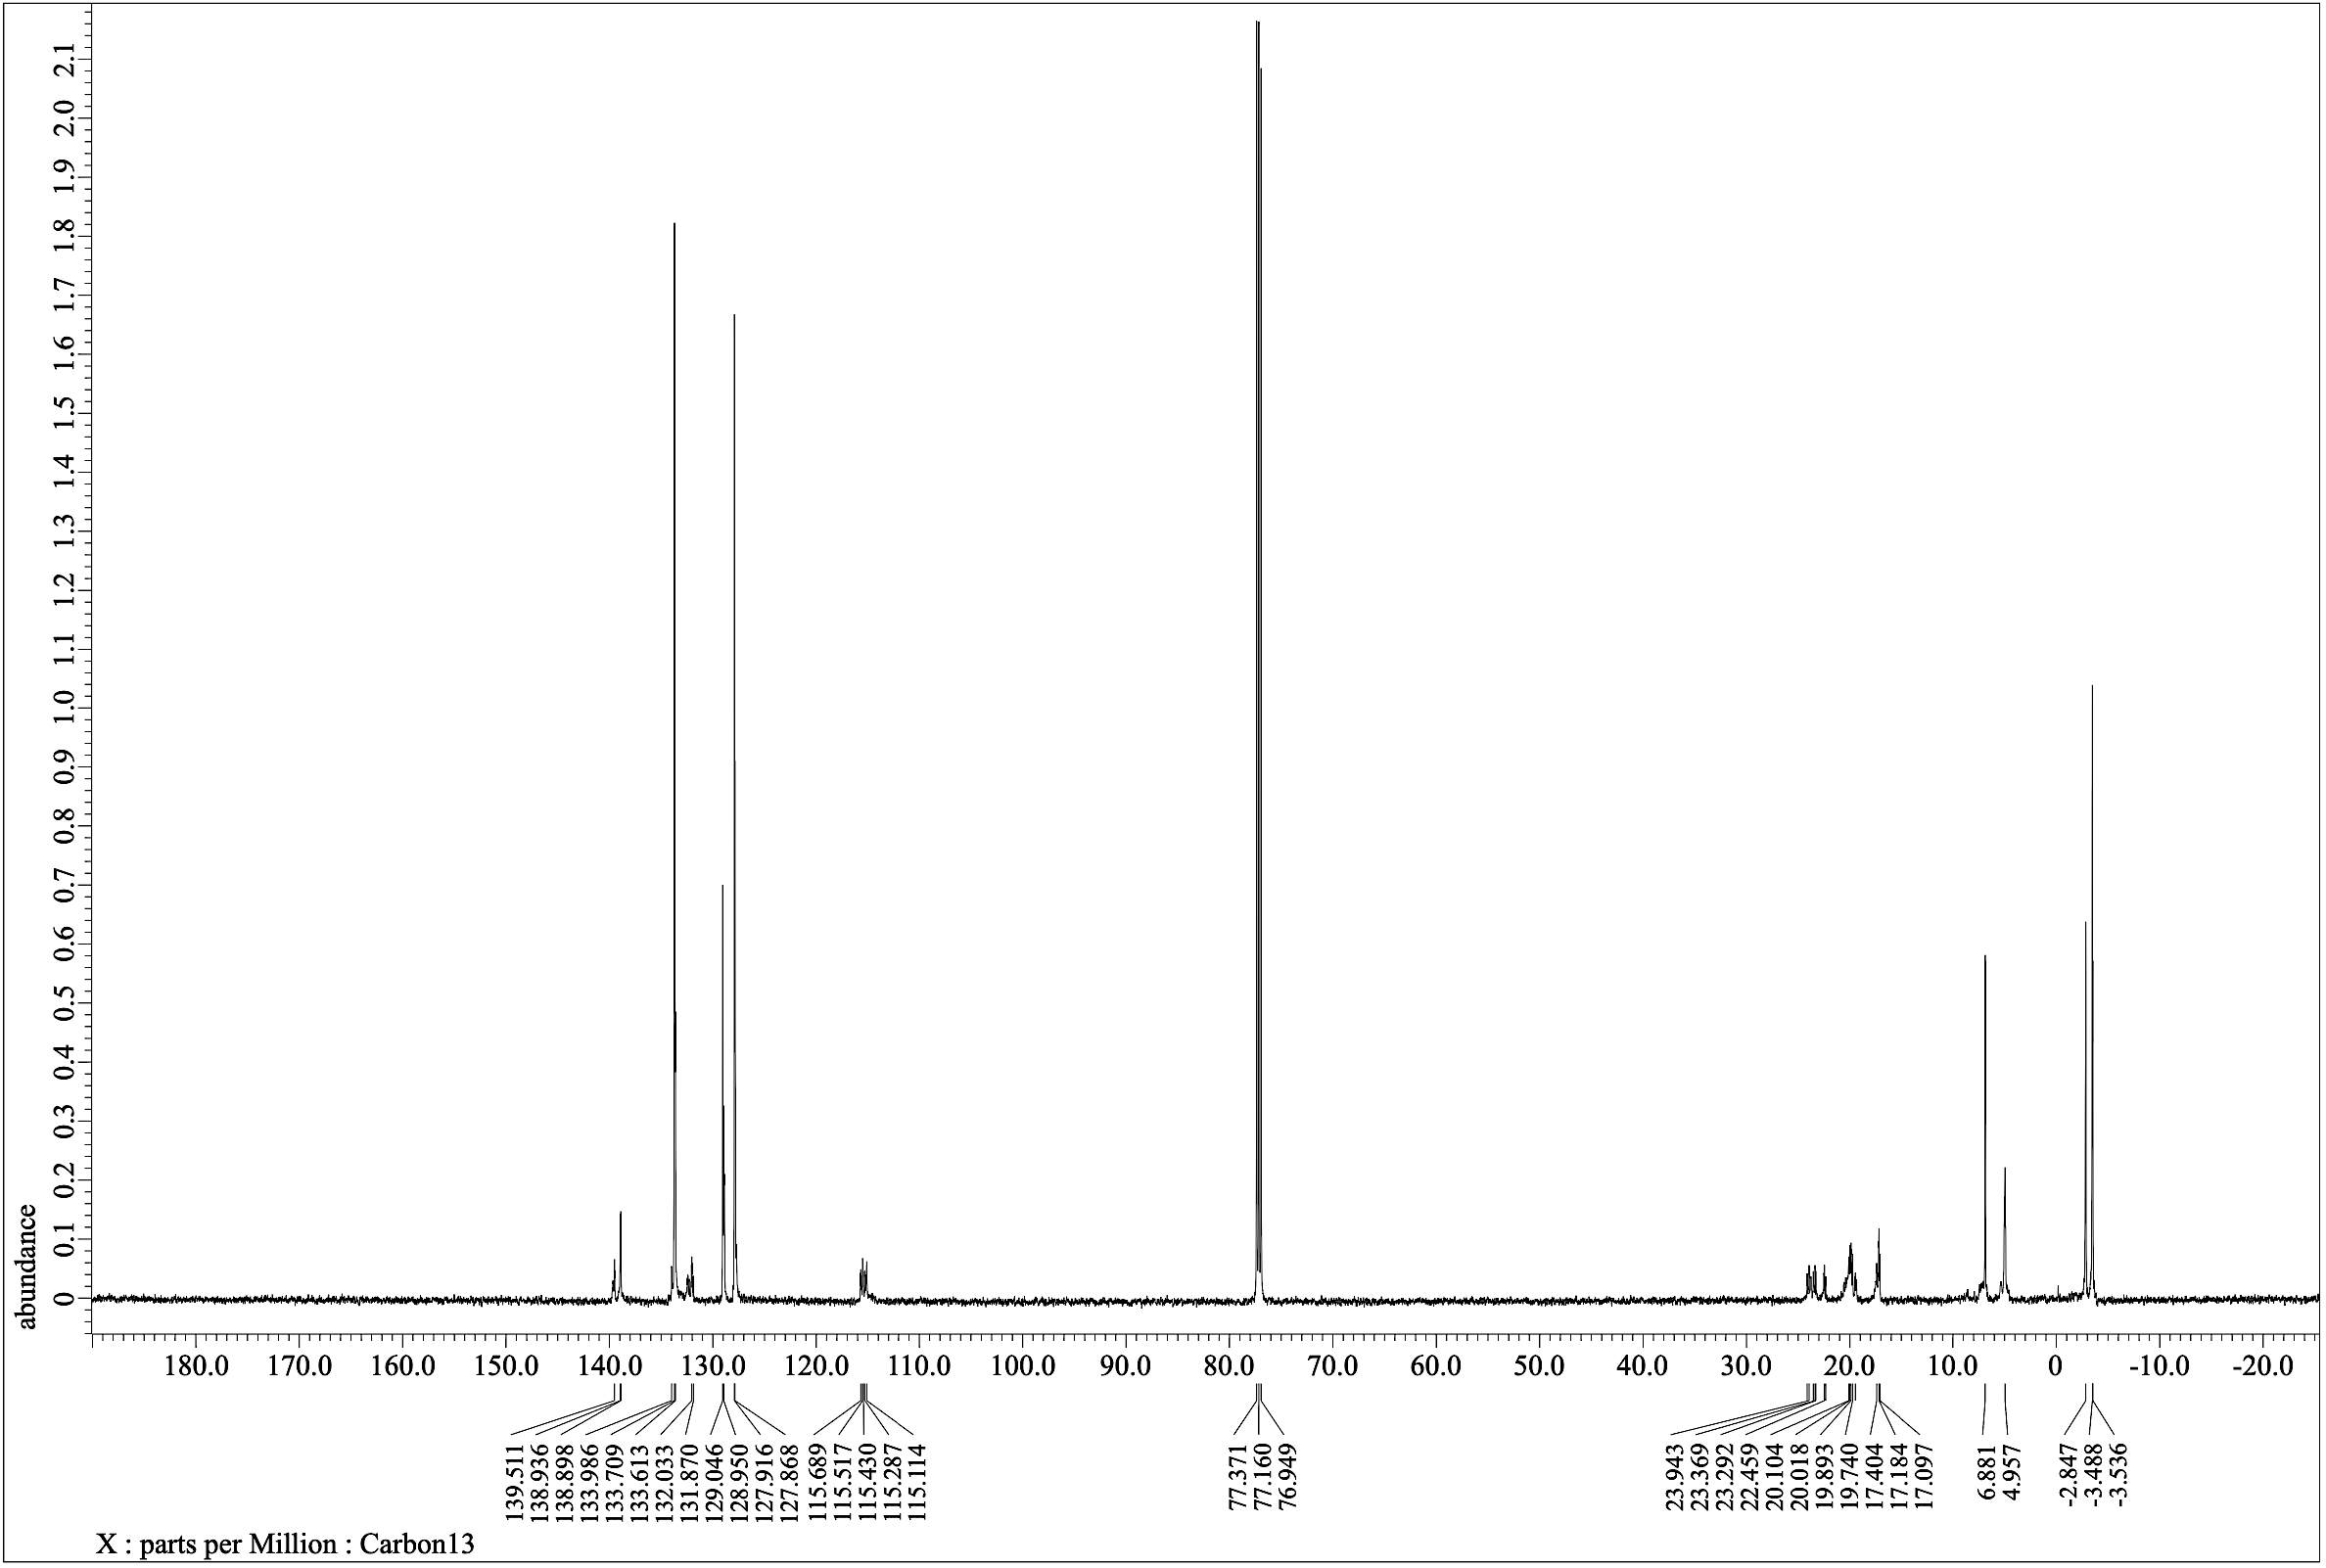


13C NMR (150.91 MHz, CDCl3)

**Figure S29: 13**C NMR spectrum for **15**.

**
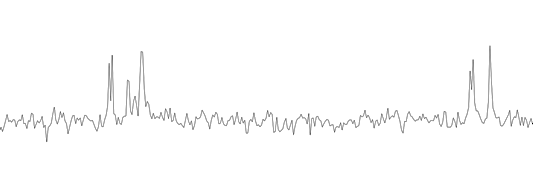

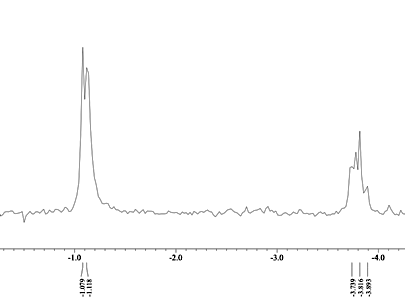

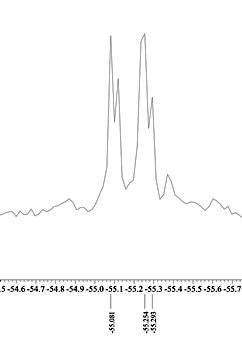

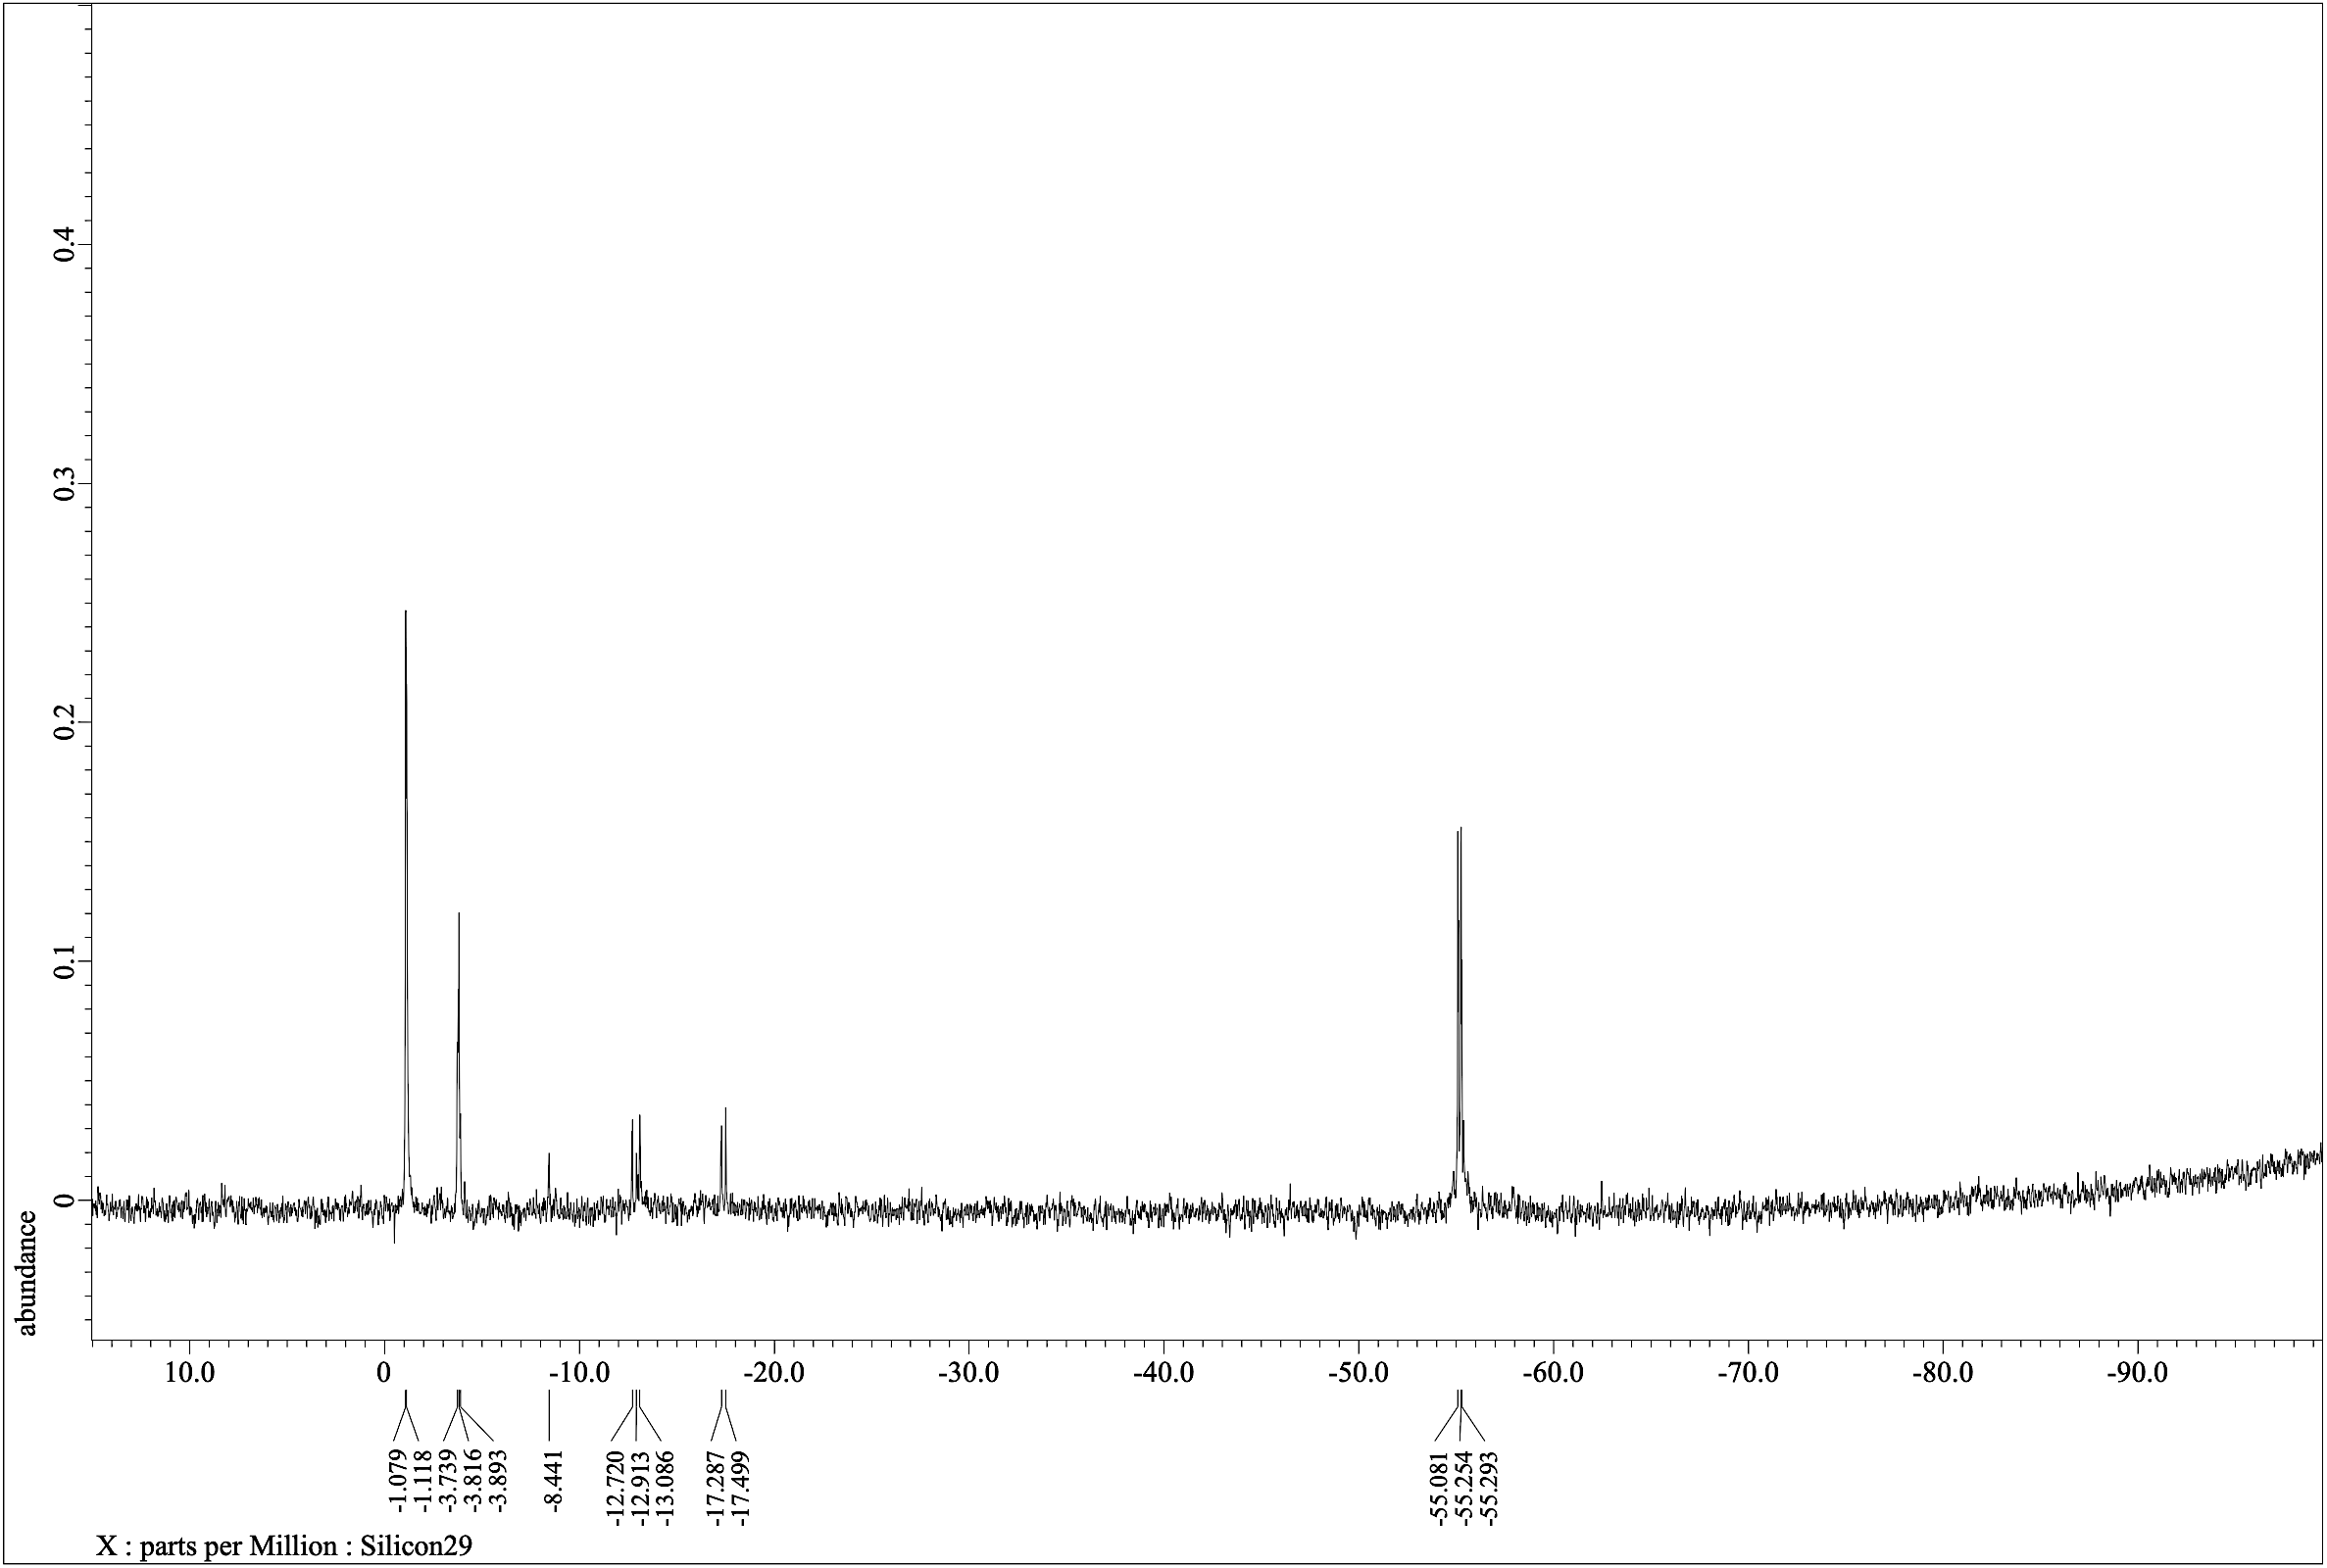
**

**-Si-**

**-Si-**

**-Si-**

29Si NMR (119.24 MHz, CDCl3)

**Figure S30: 29**Si NMR spectrum for **15**.

**3. MALDI-TOF MS Spectra for synthetic compounds 6-15**

**
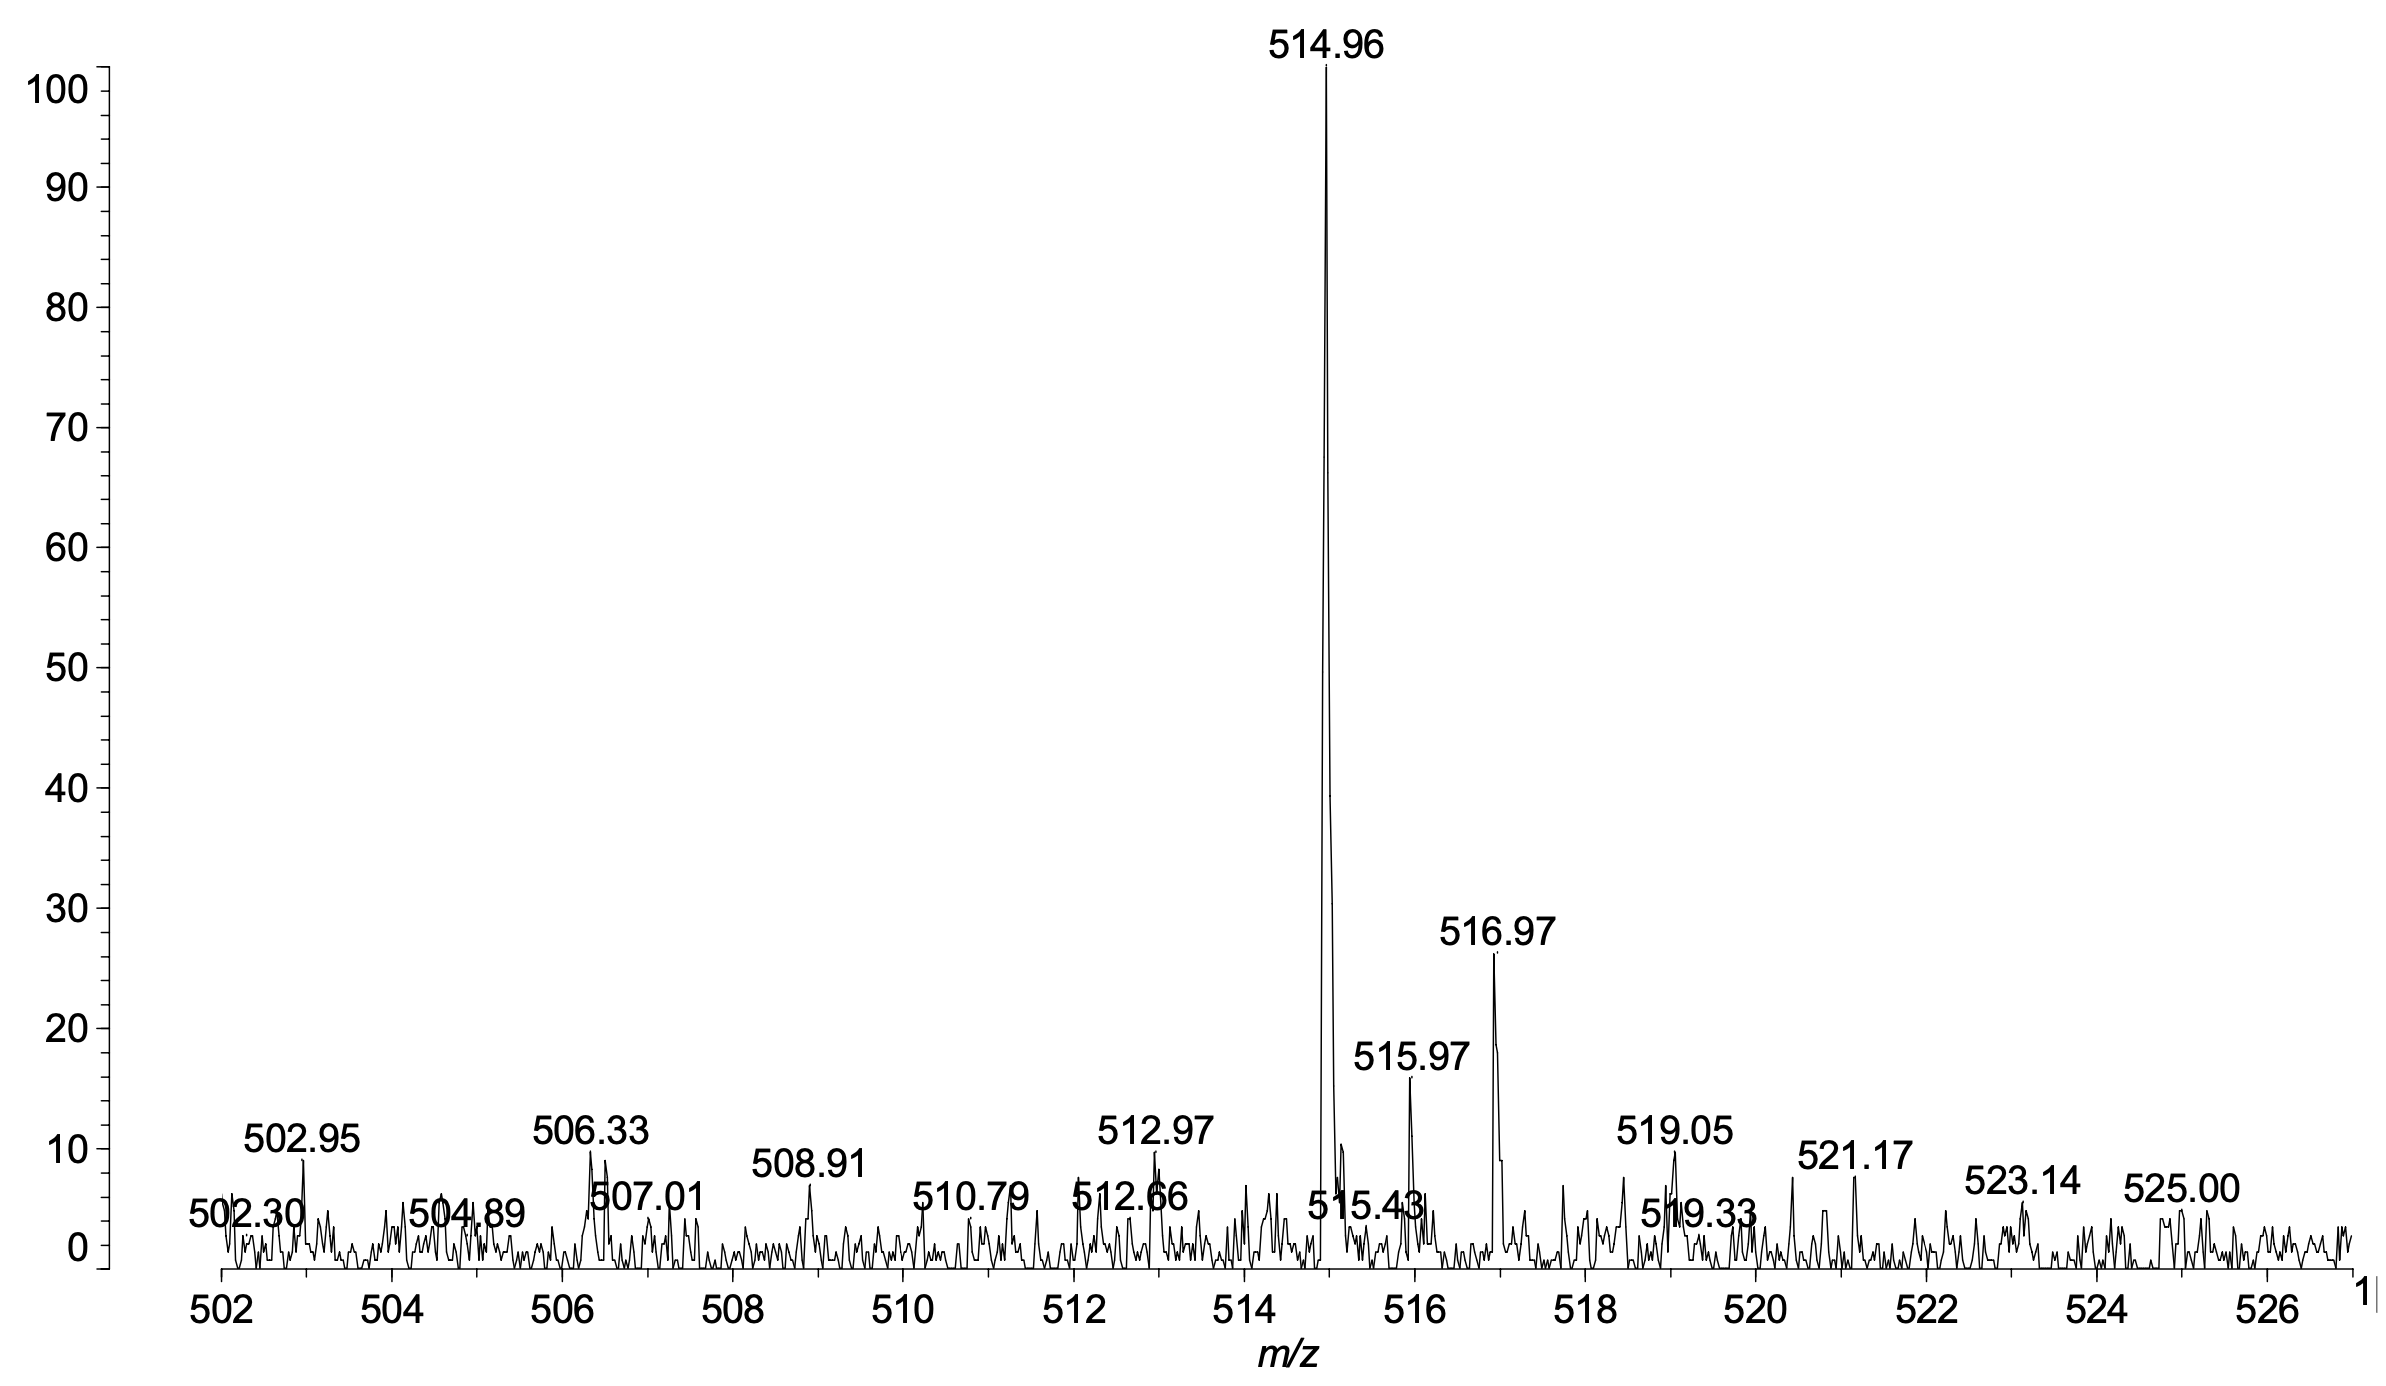
**

**6**

**Figure S31:** MALDI-TOF MS spectrum for **6**.

**
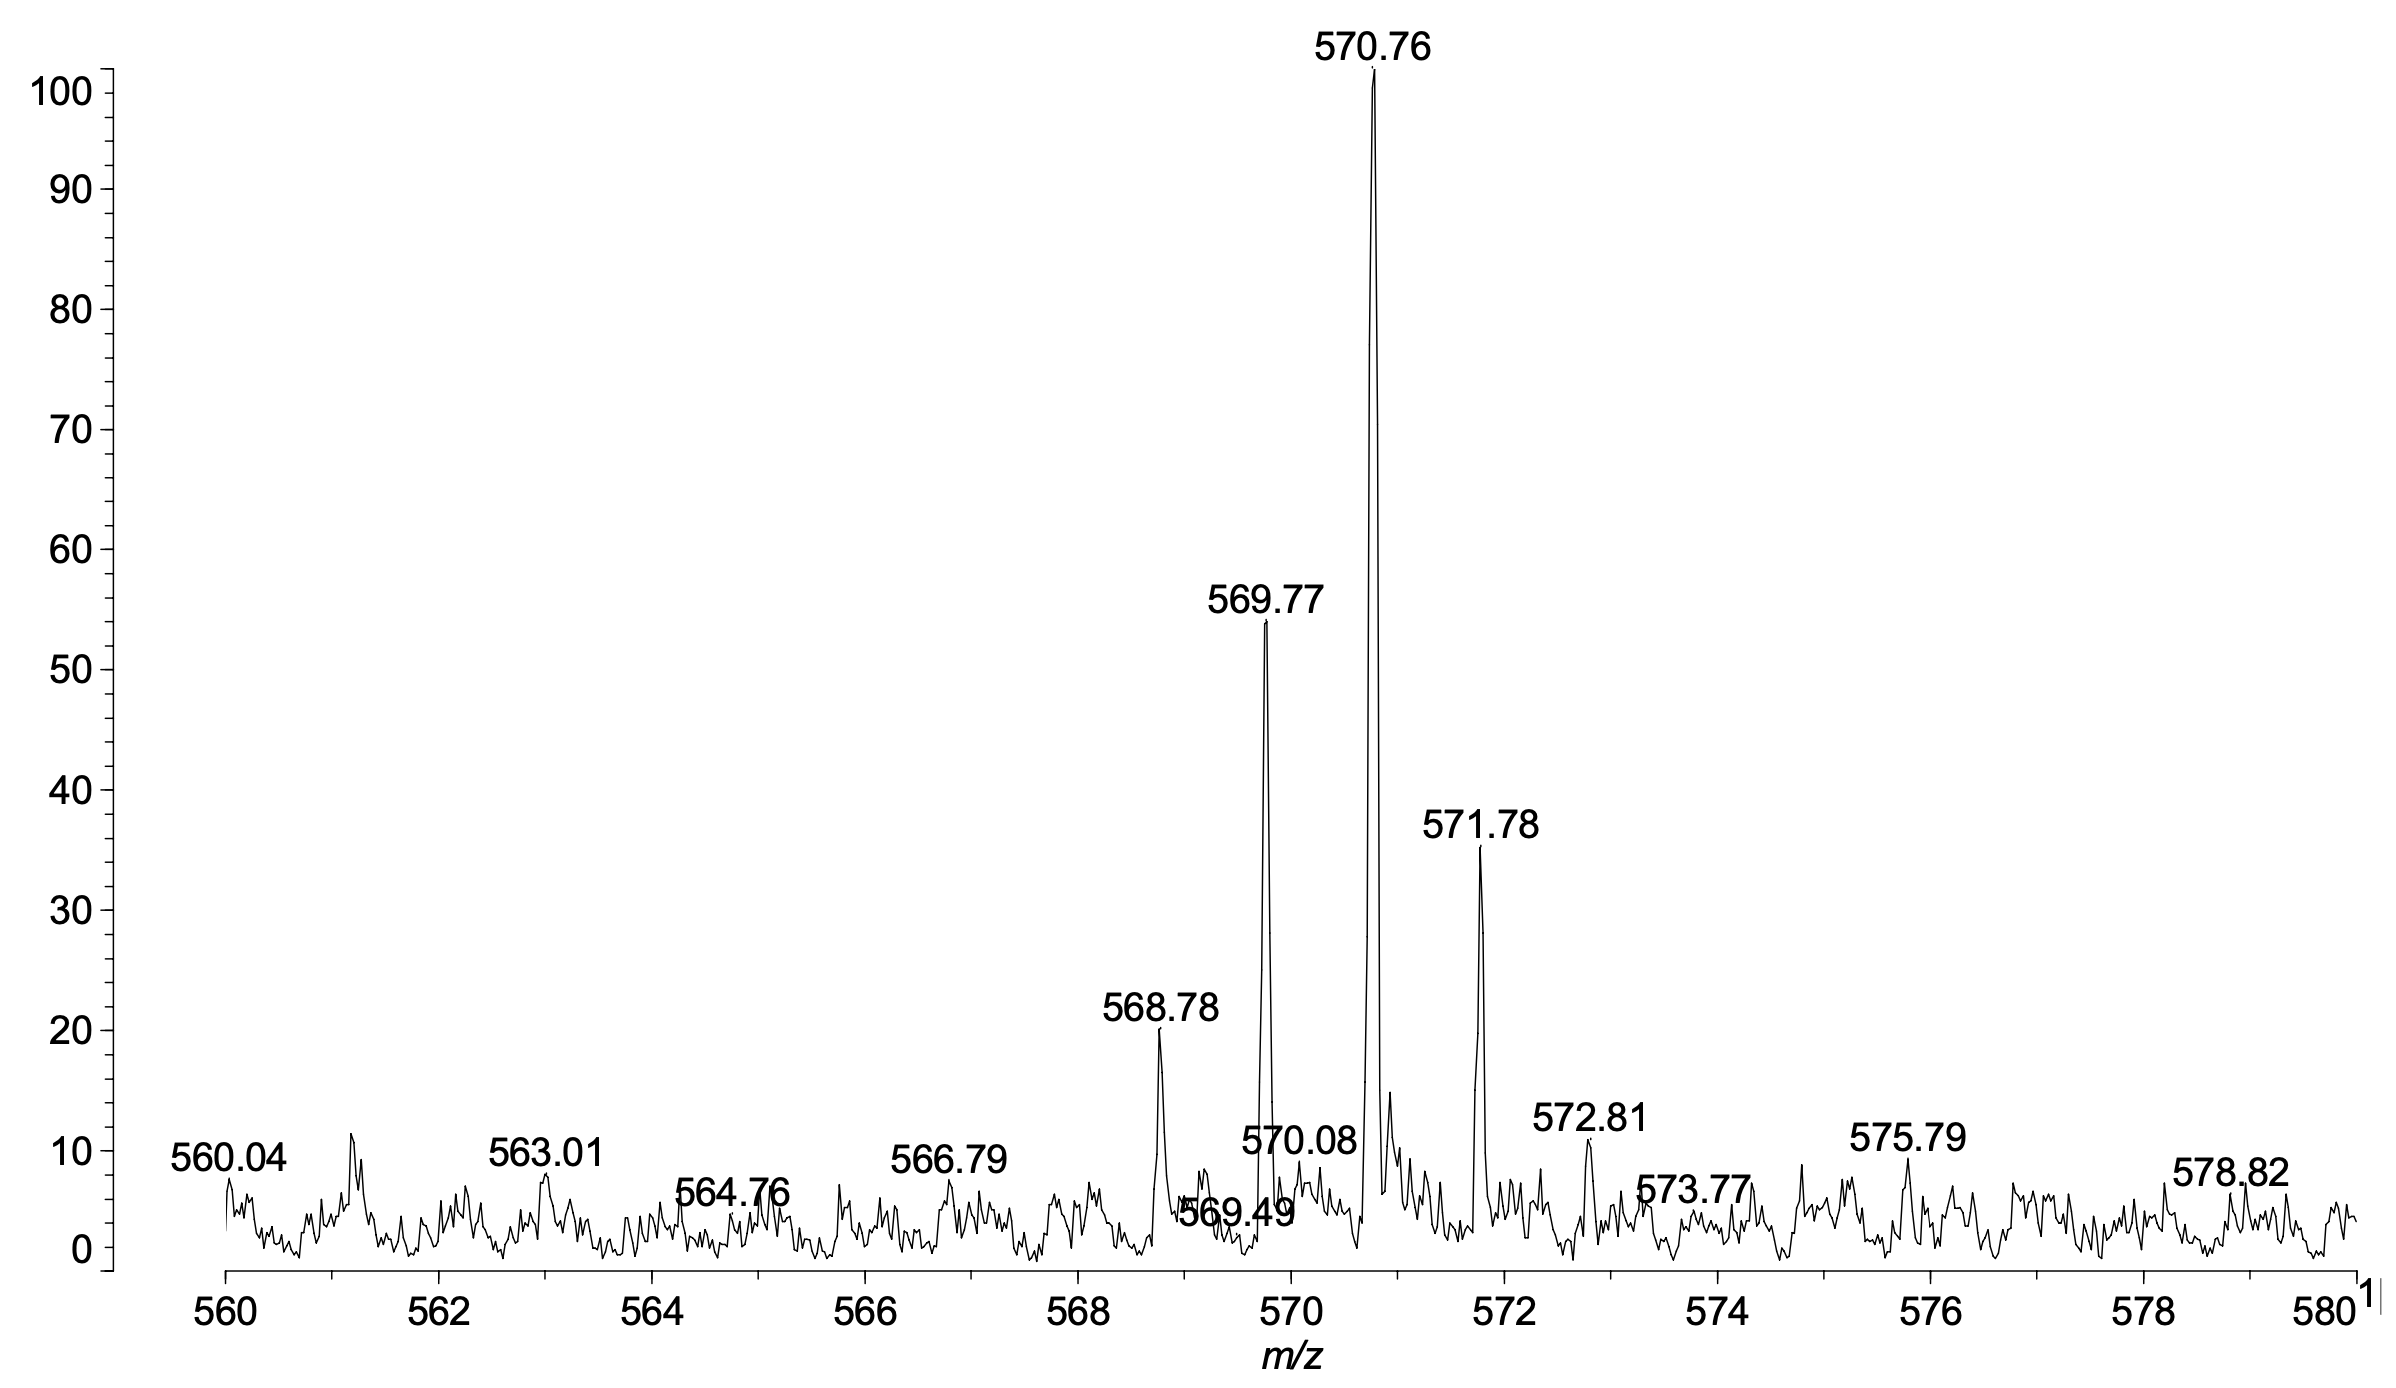
**

**7**

**Figure S32:** MALDI-TOF MS spectrum for **7**.


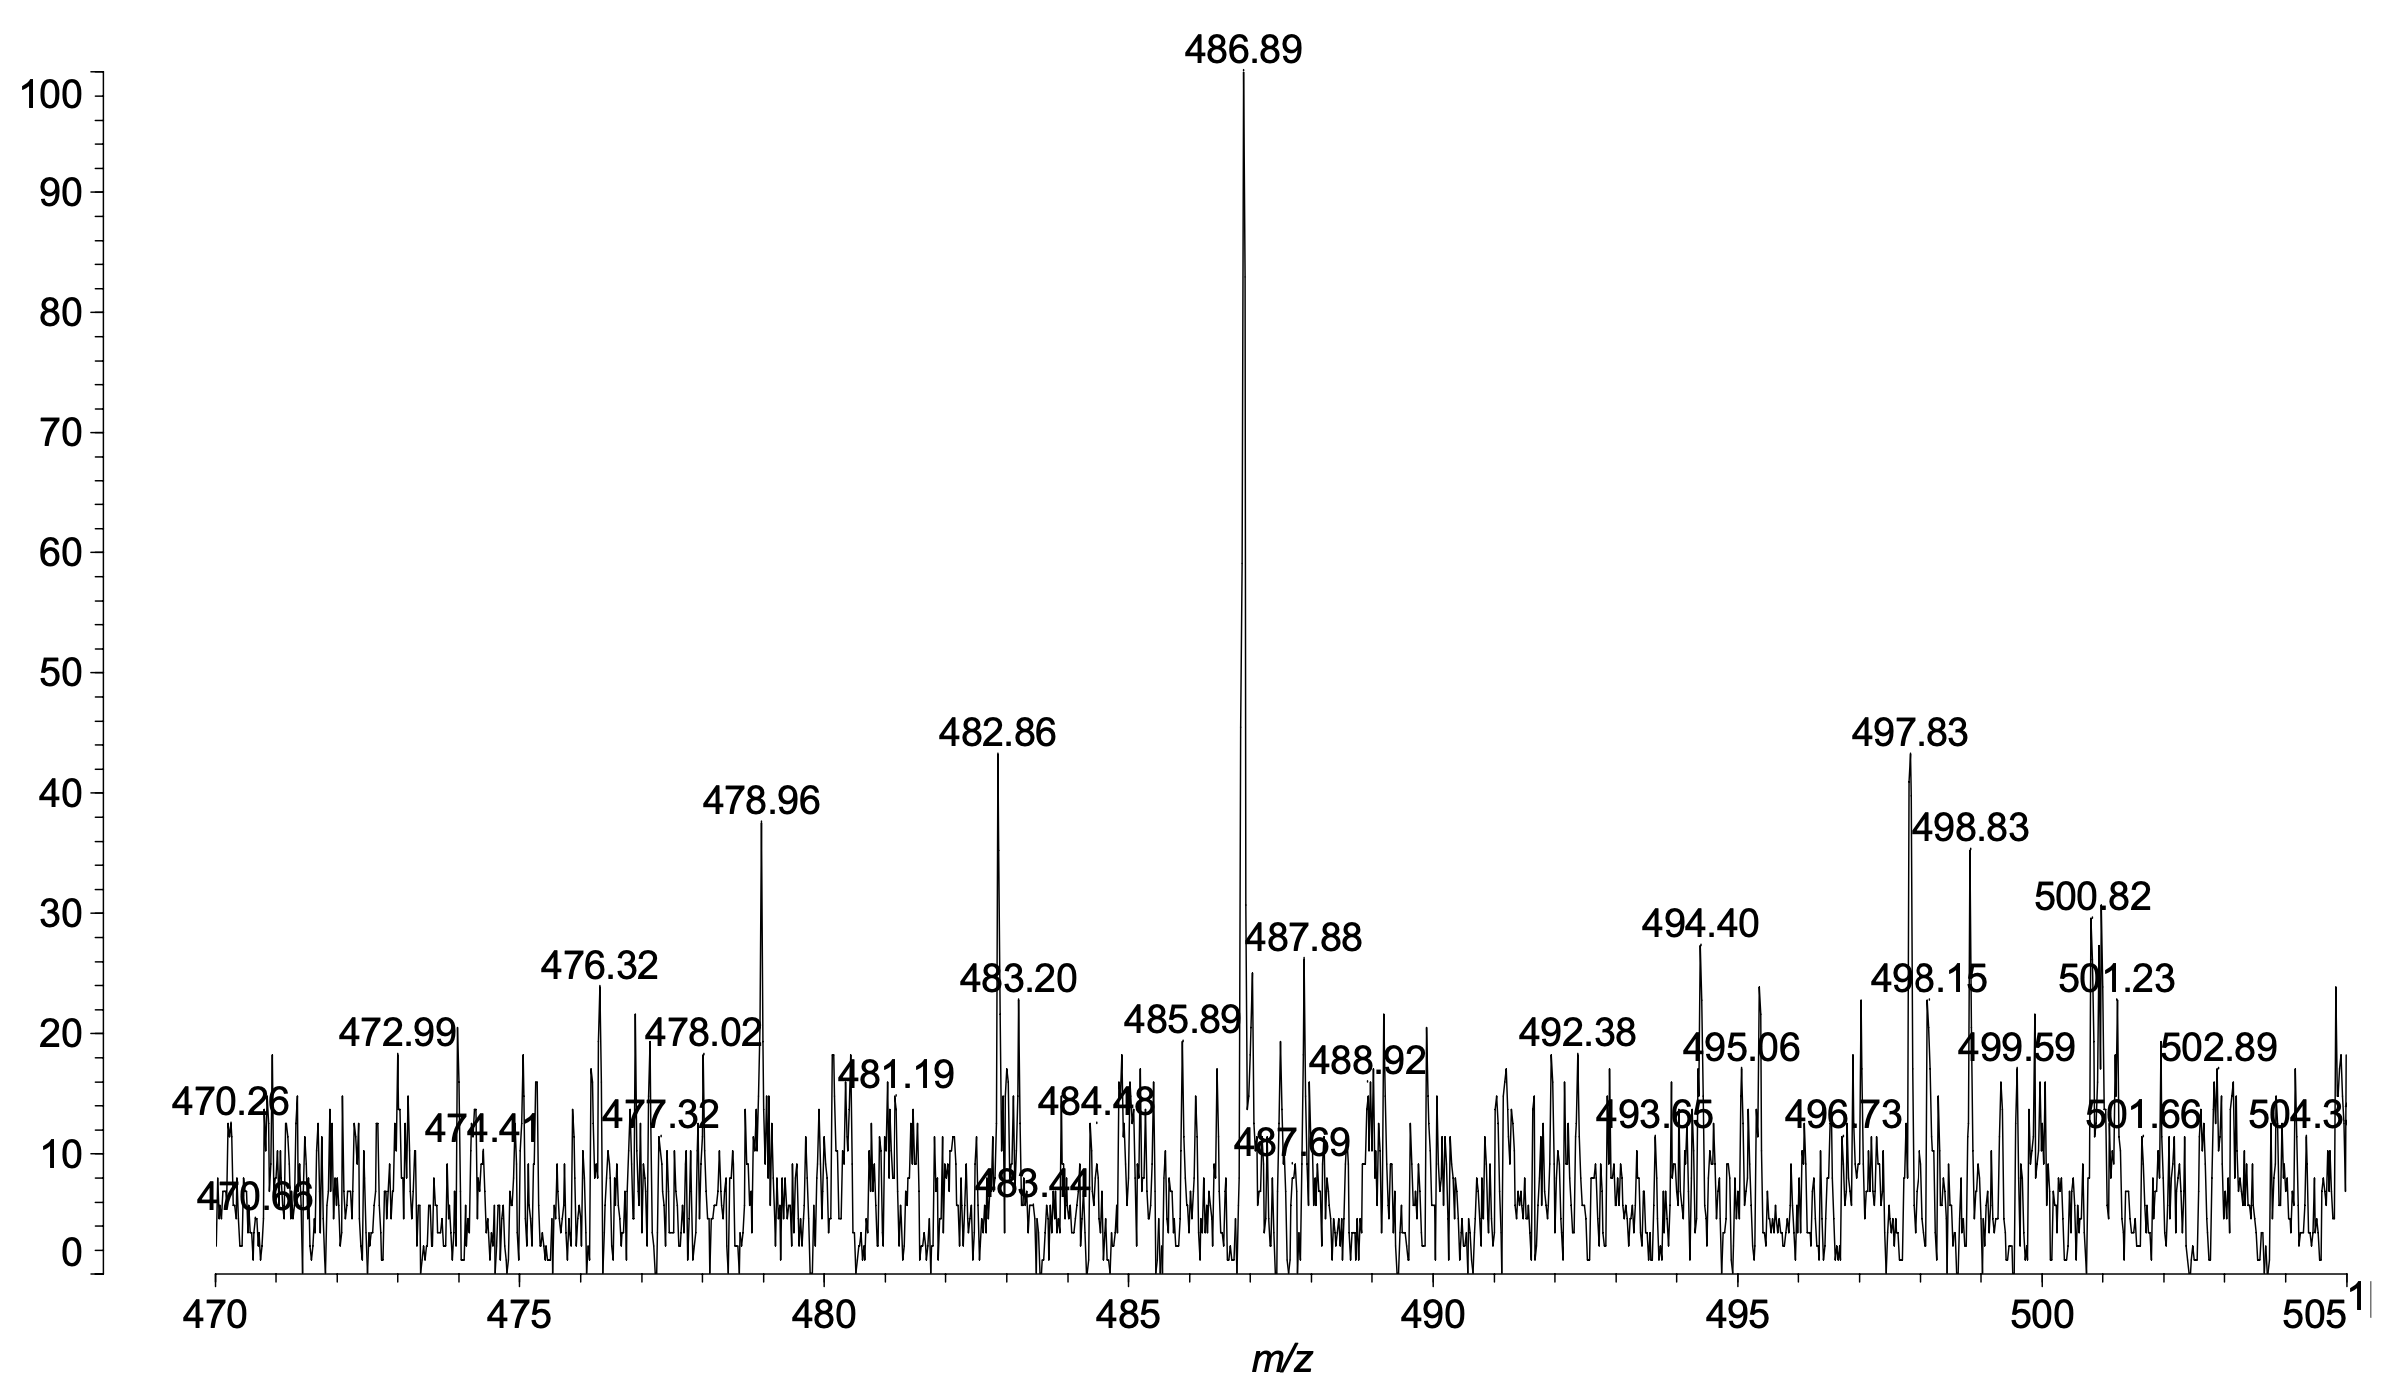


**8**

**Figure S33:** MALDI-TOF MS spectrum for **8**.

**
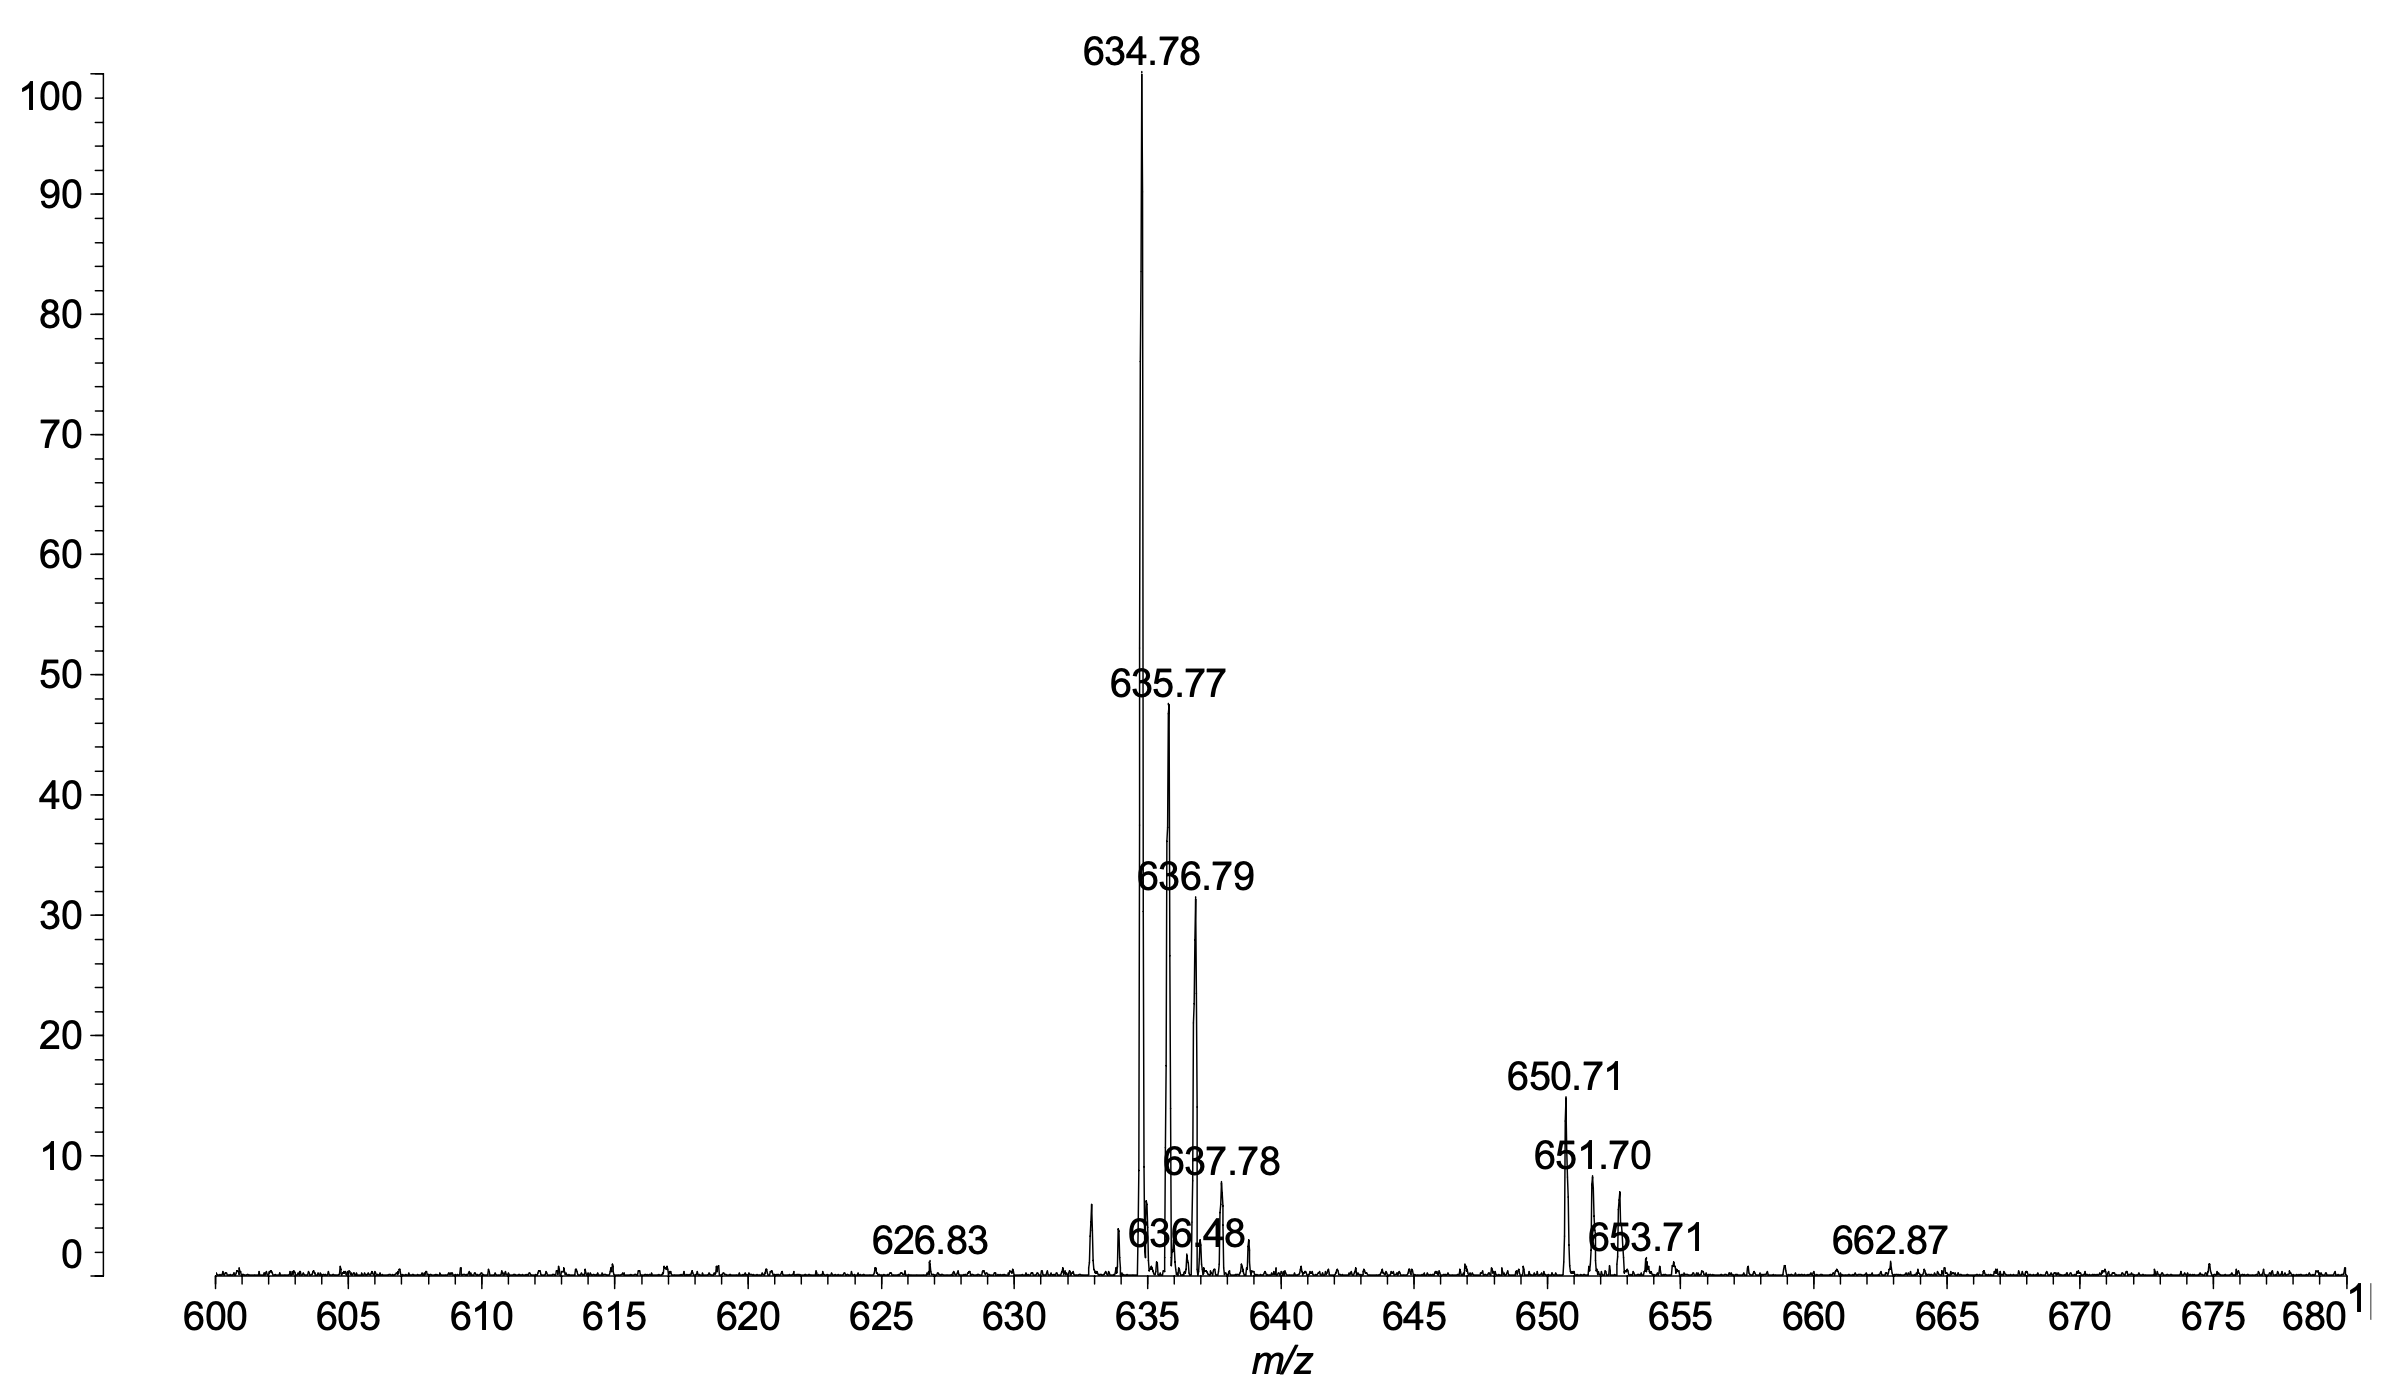
**

**9**

**Figure S34:** MALDI-TOF MS spectrum for **9**.

**
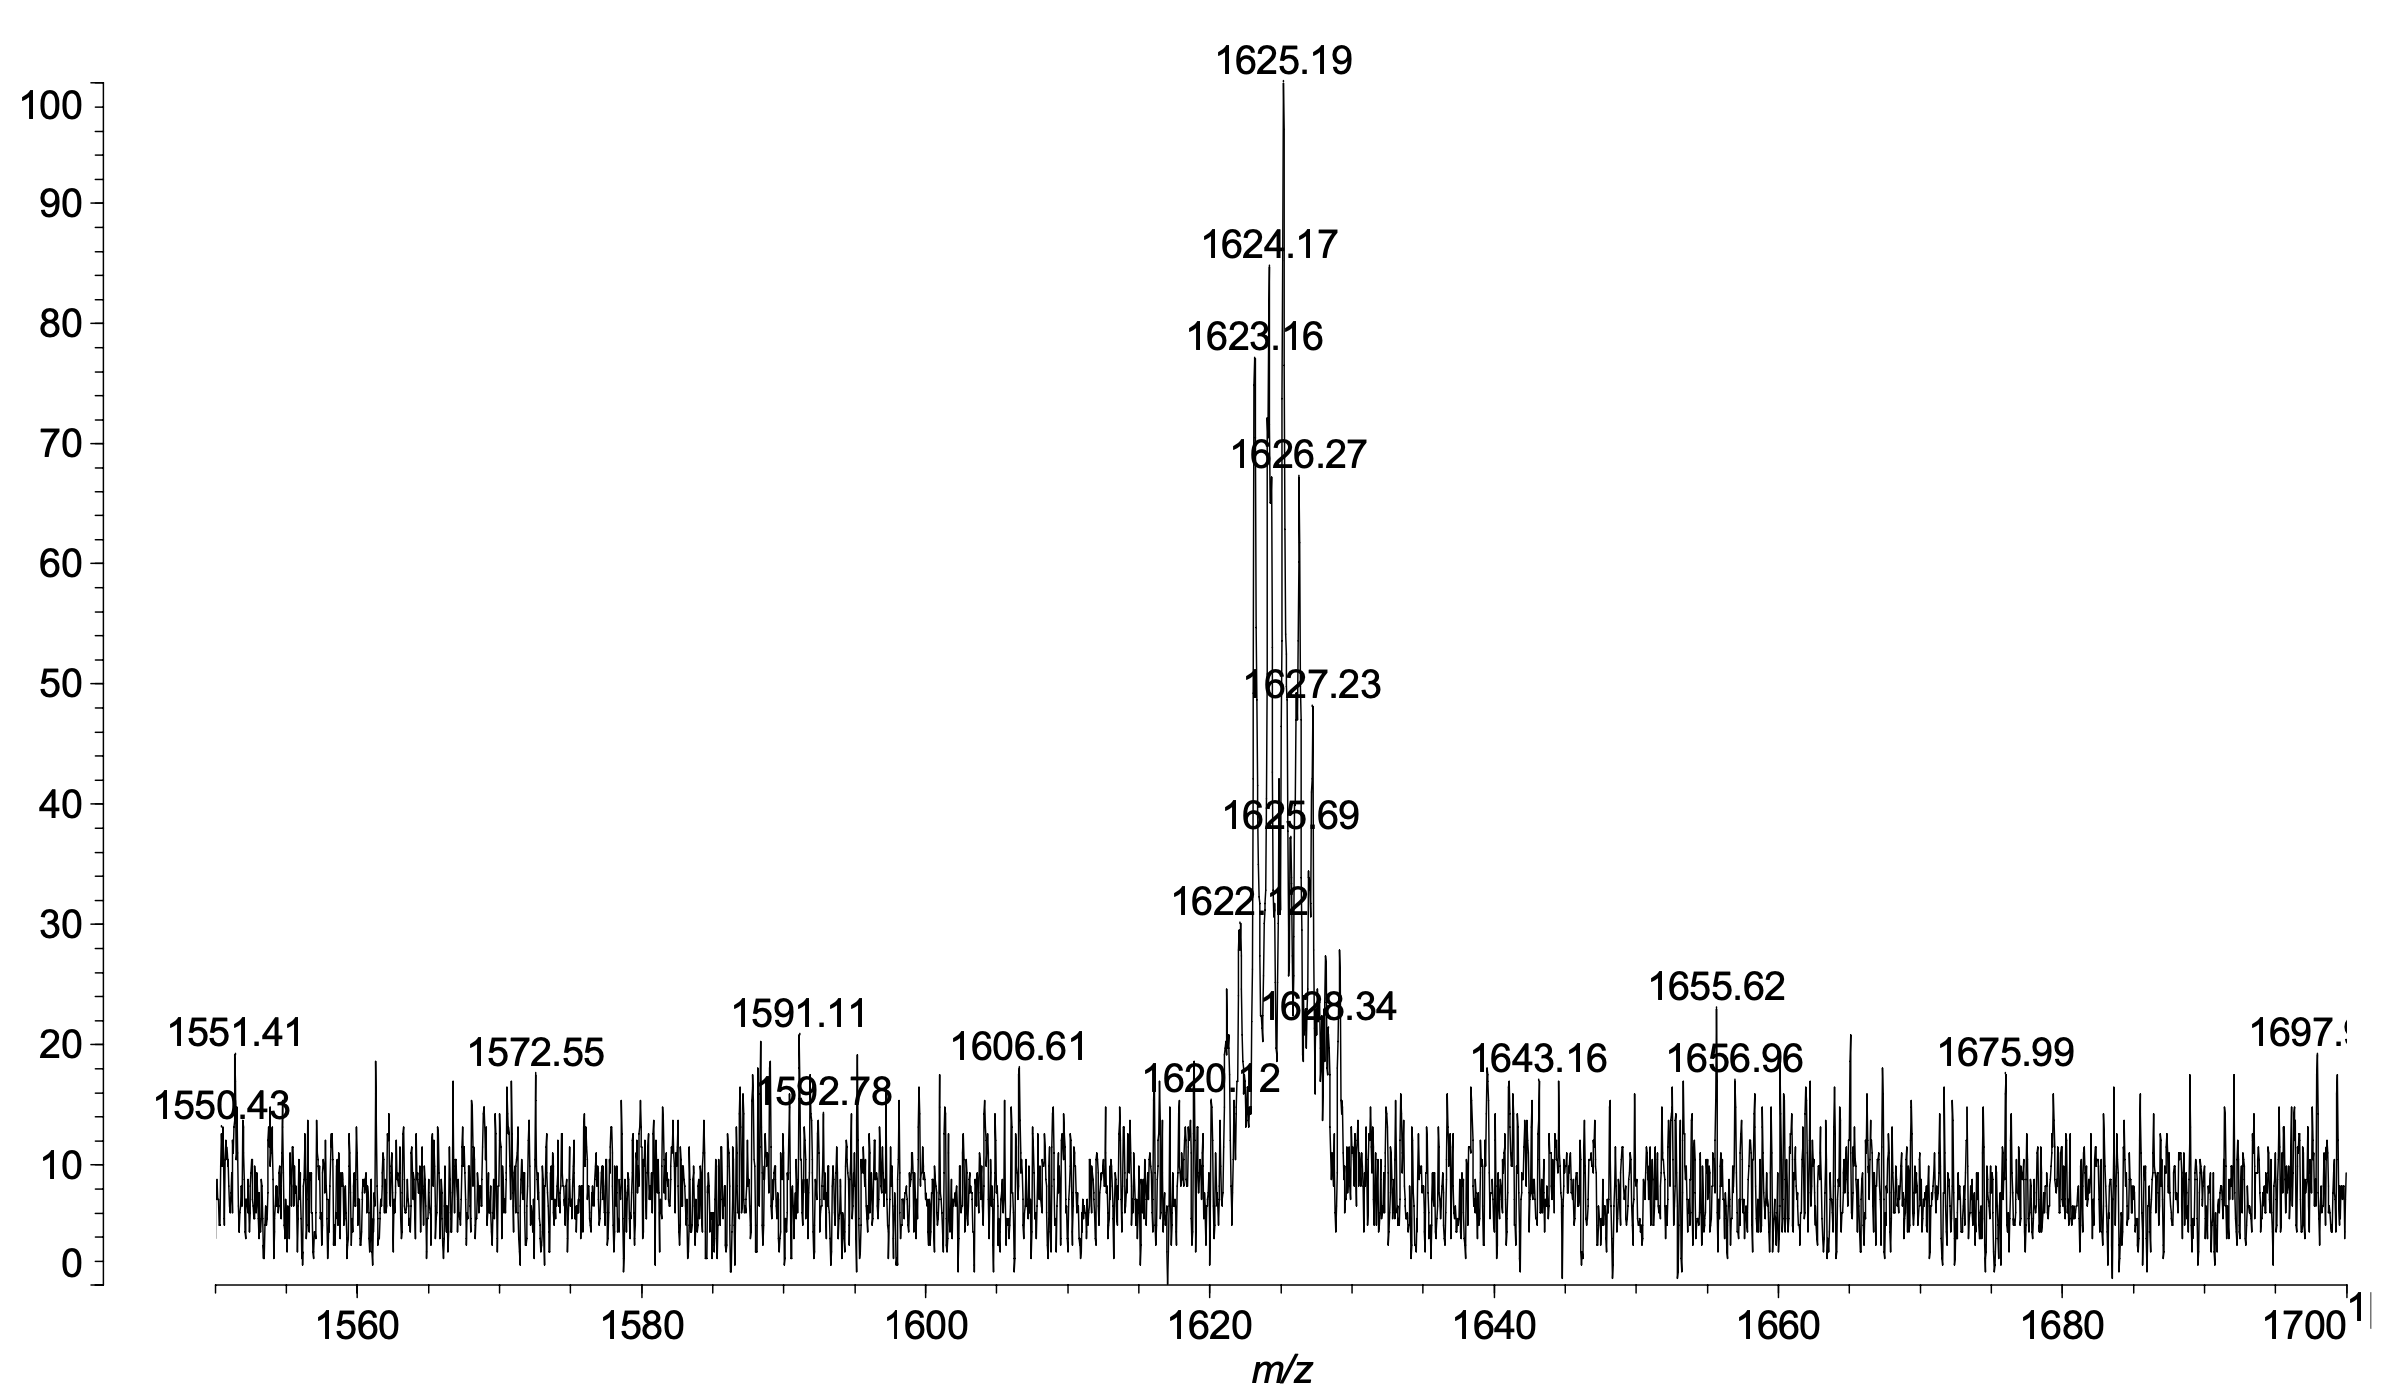
**

**10**

**Figure S35:** MALDI-TOF MS spectrum for **10**.

**
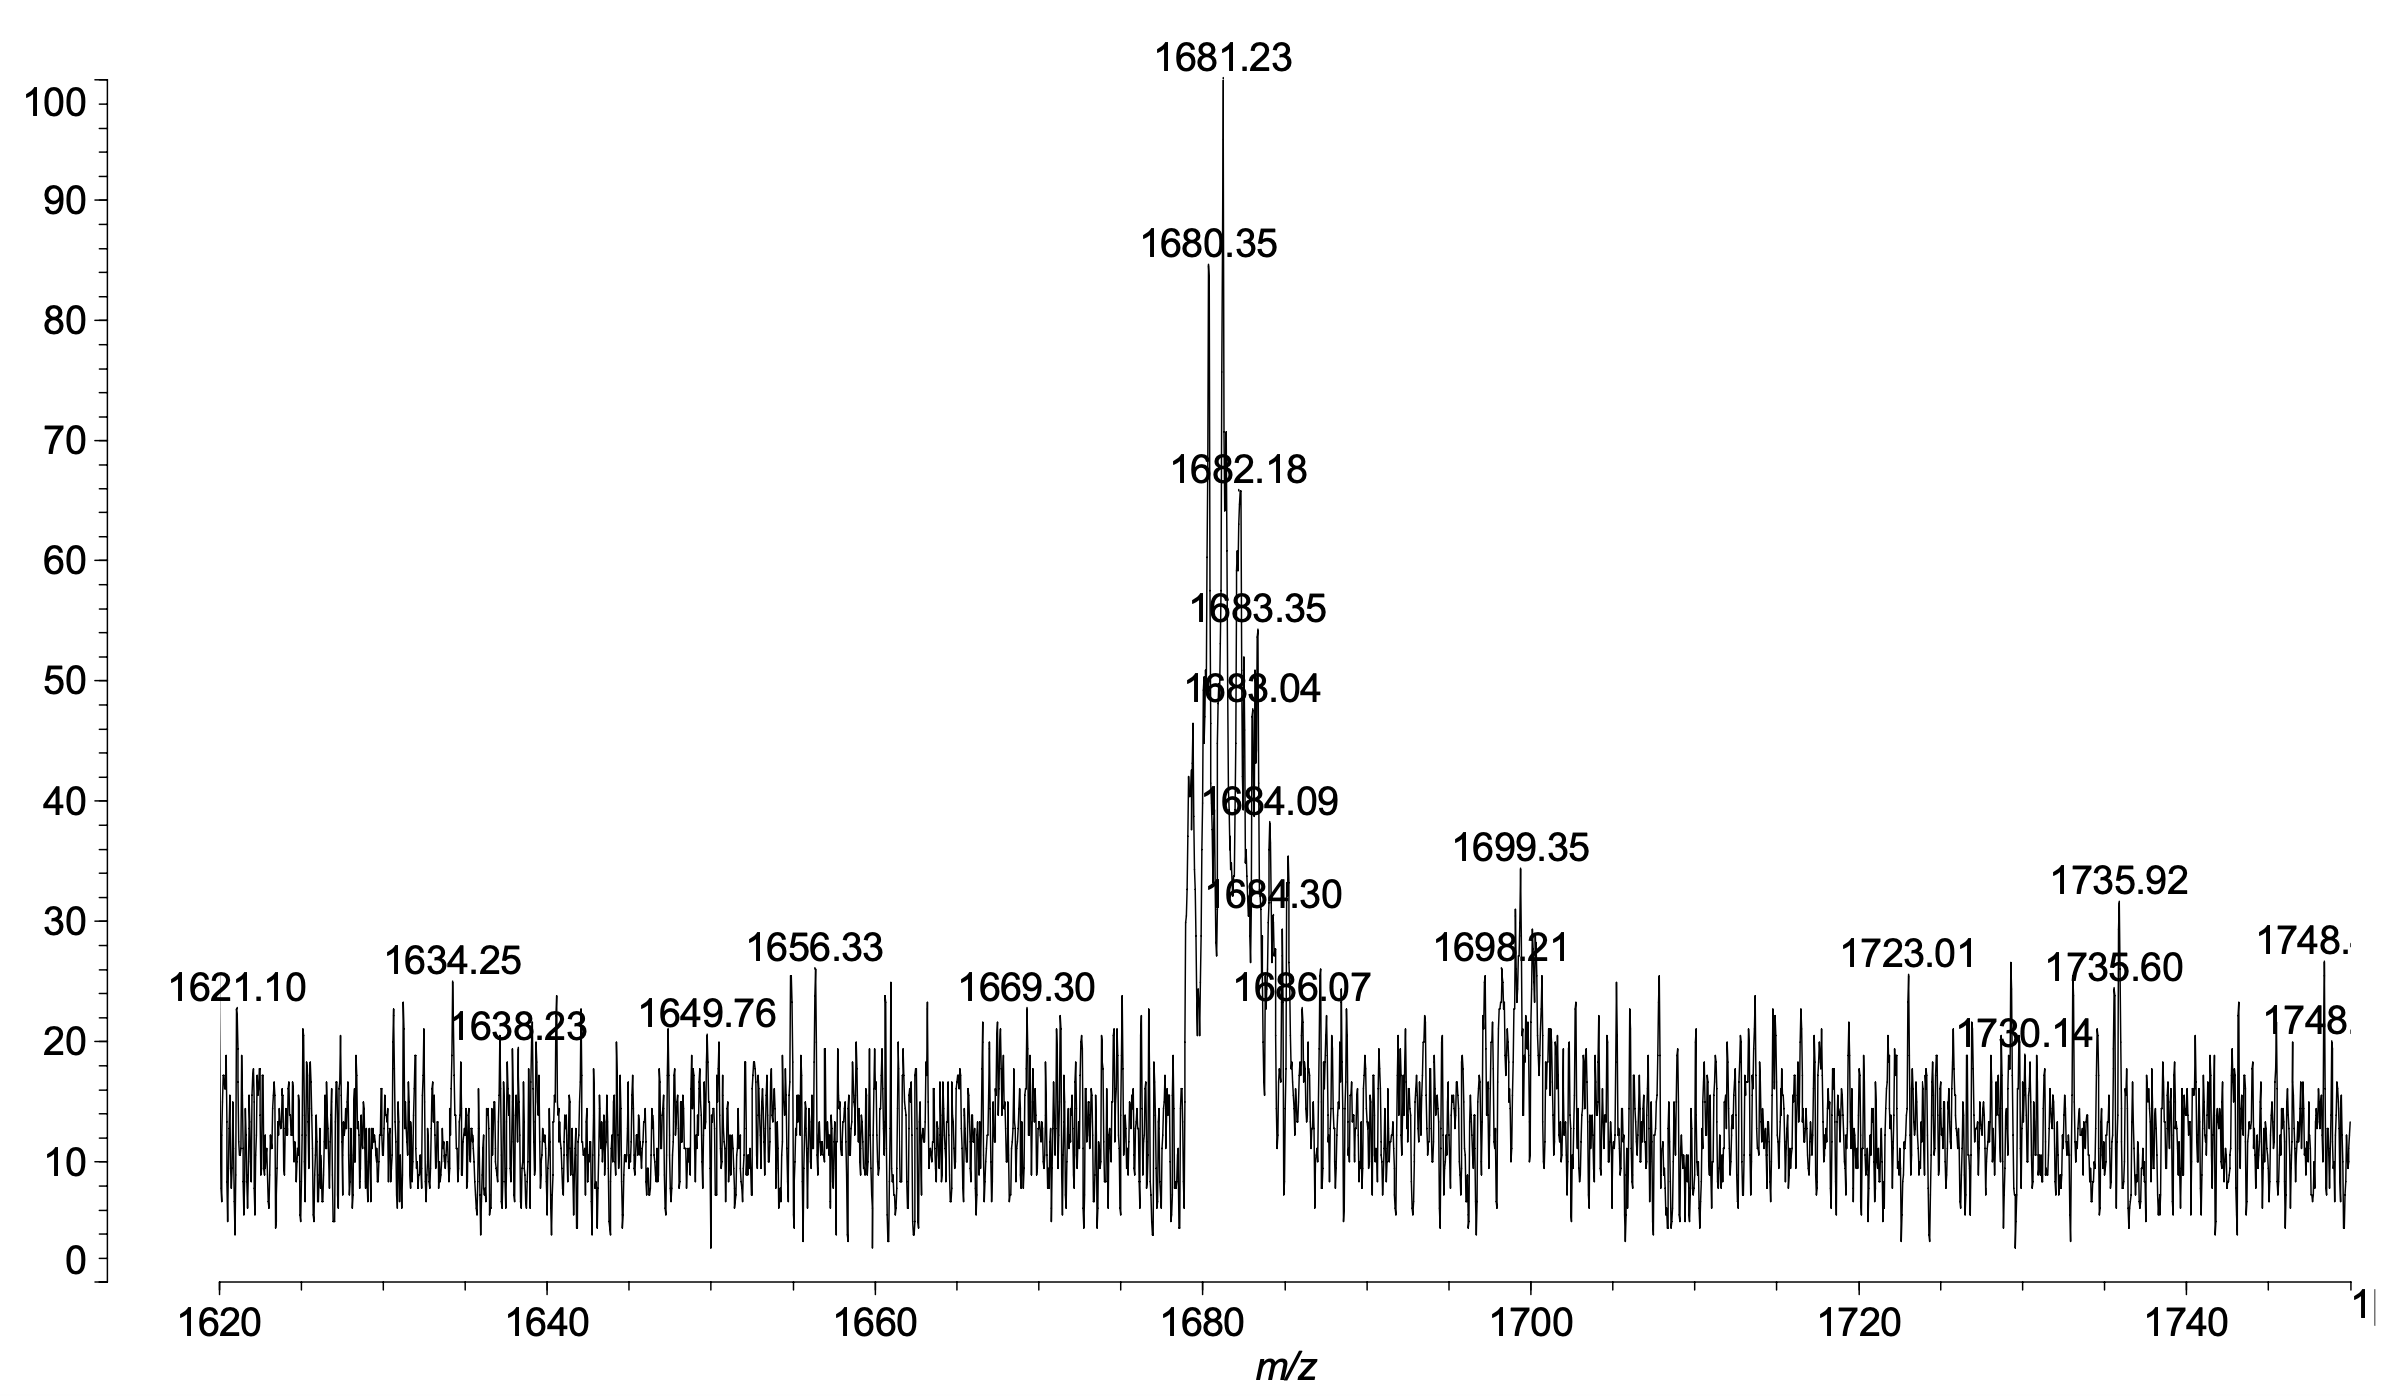
**

**11**

**Figure S36:** MALDI-TOF MS spectrum for **11**.

**
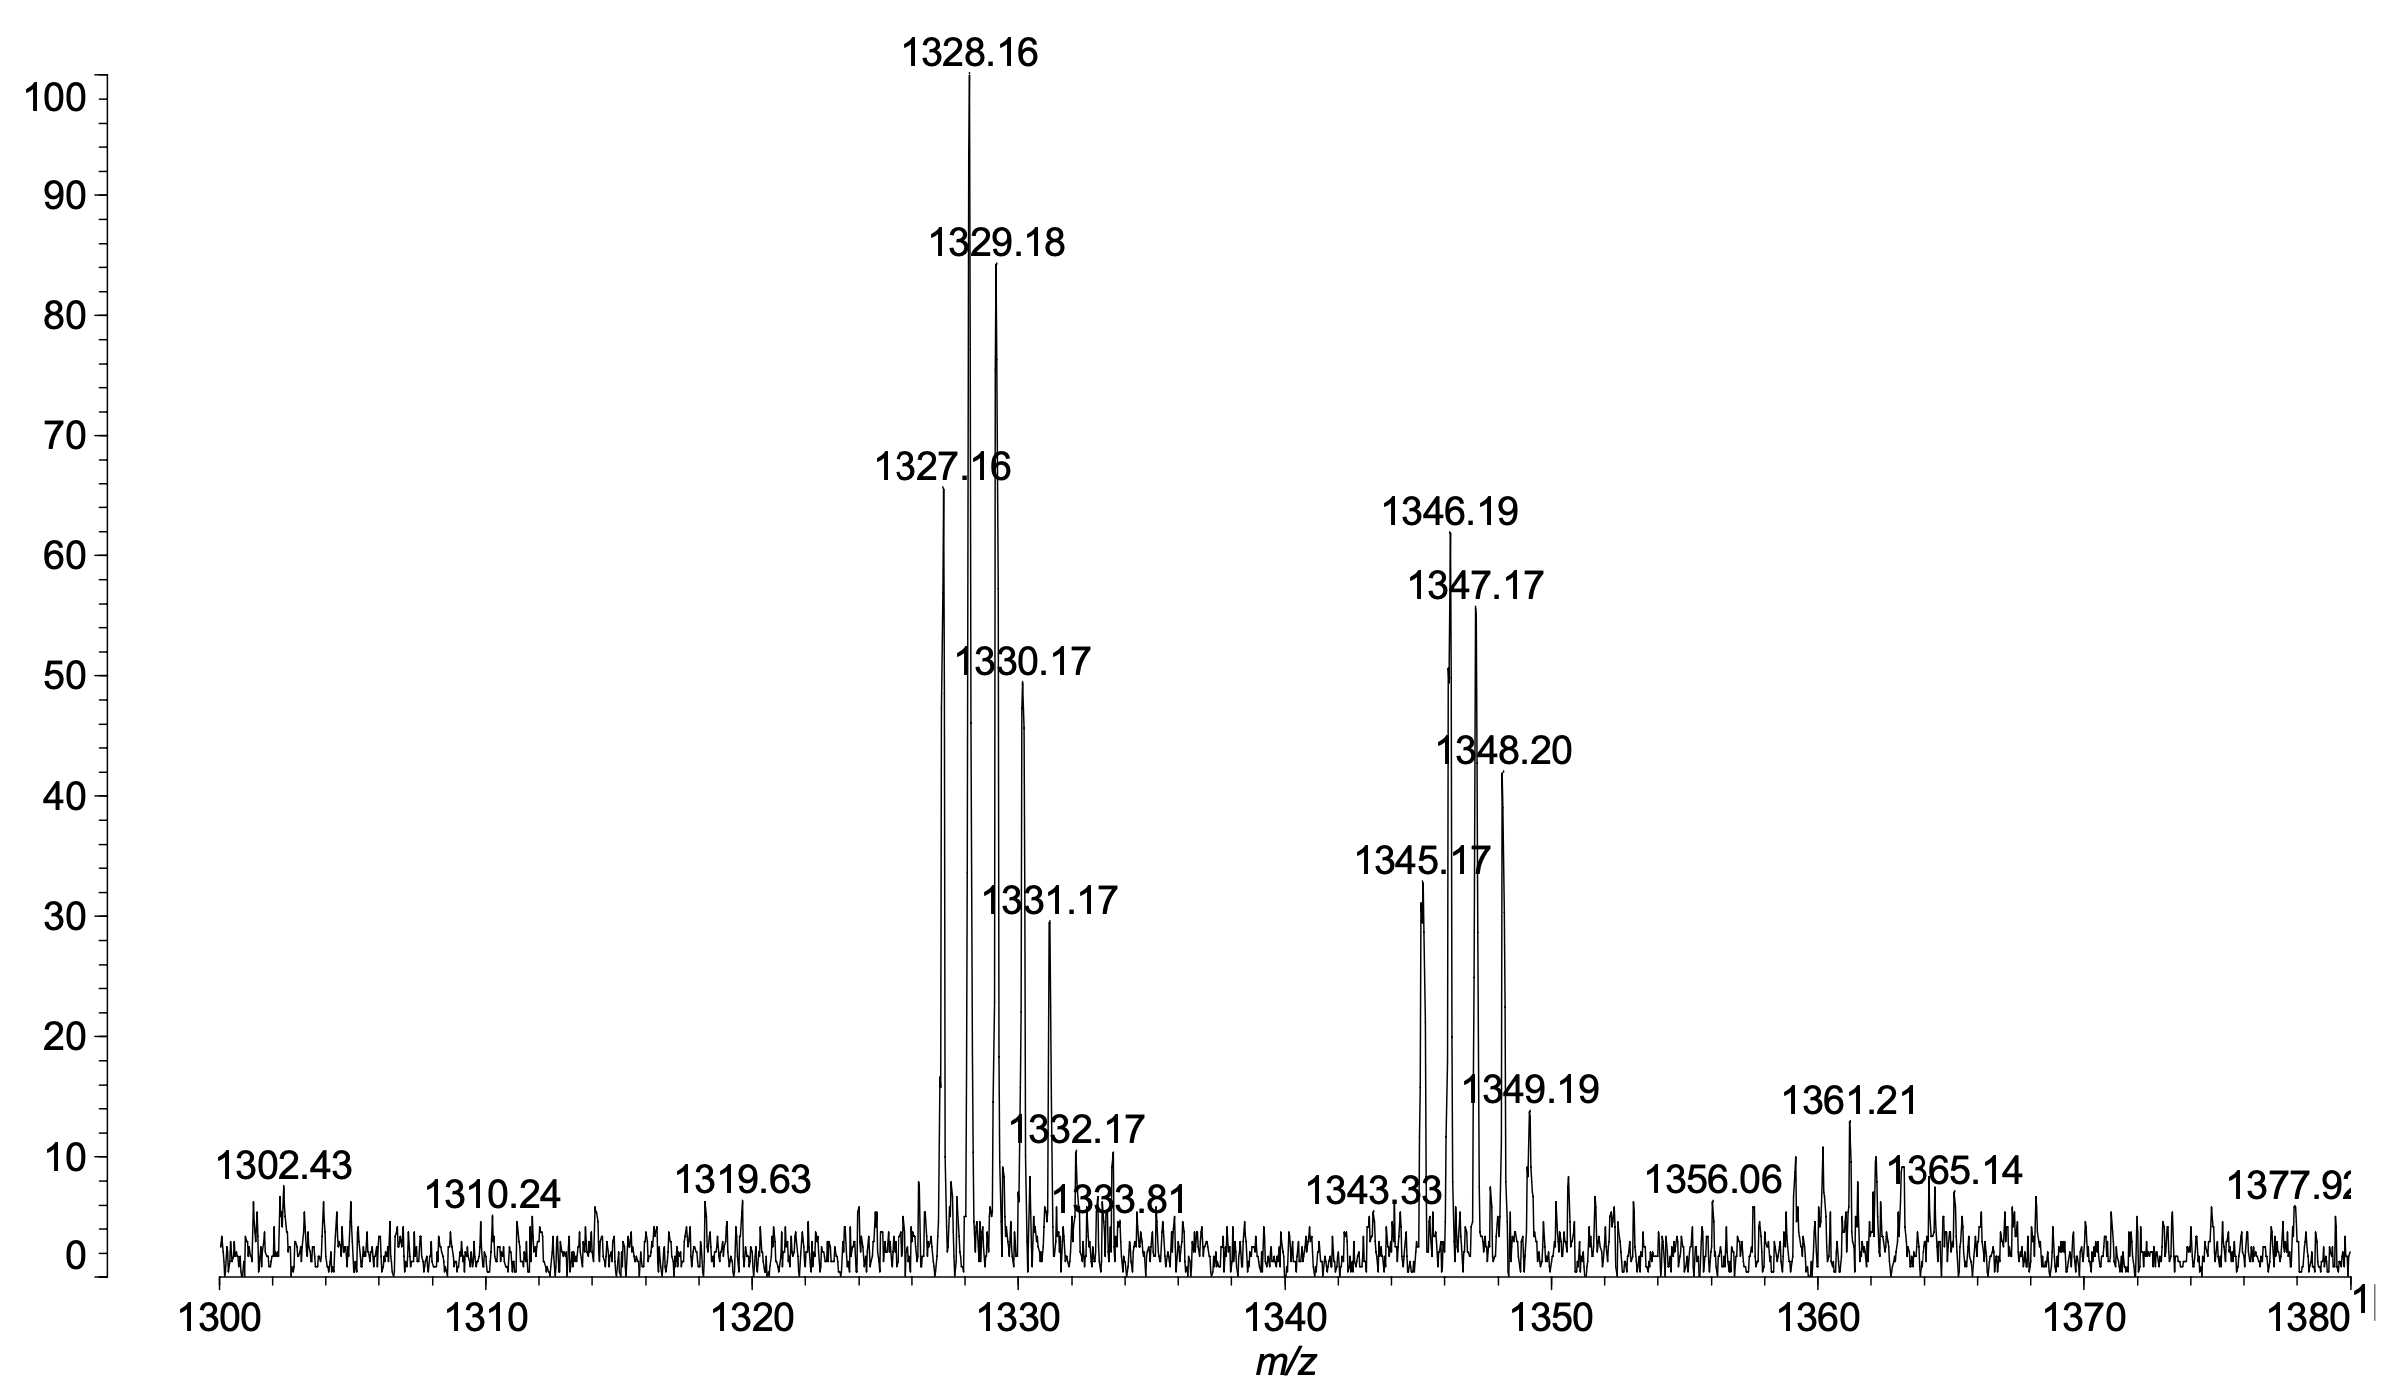
**

**12**

**Figure S37:** MALDI-TOF MS spectrum for **12**.


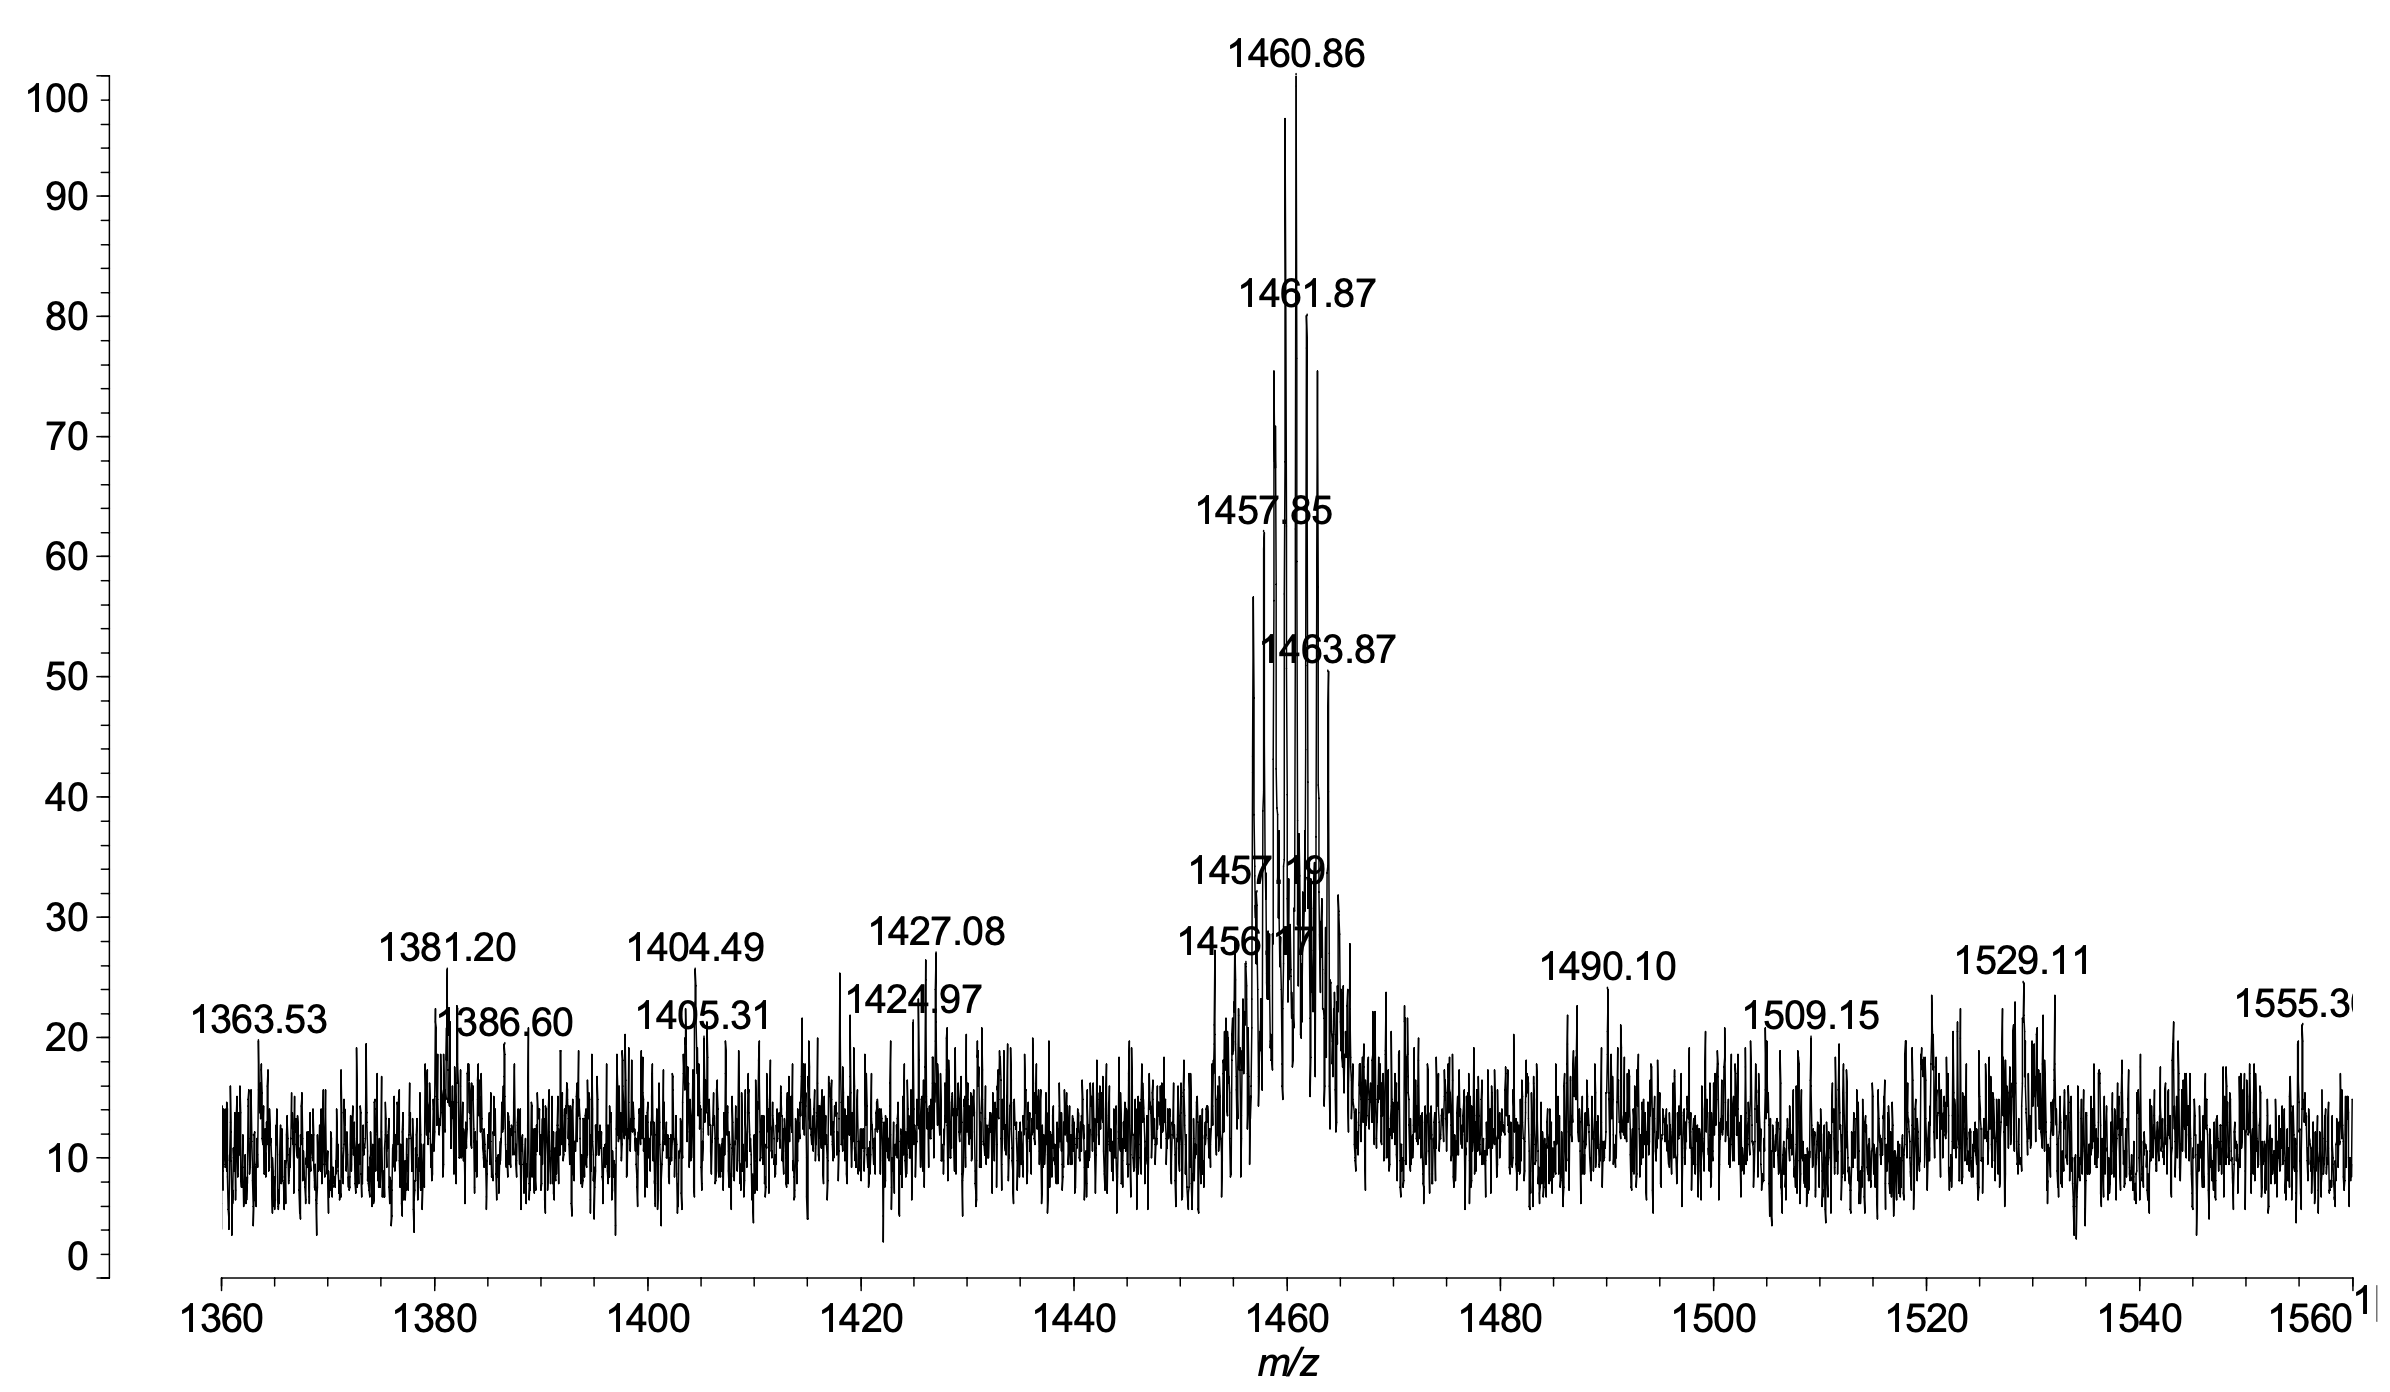


**13**

**Figure S38:** MALDI-TOF MS spectrum for **13**.

**
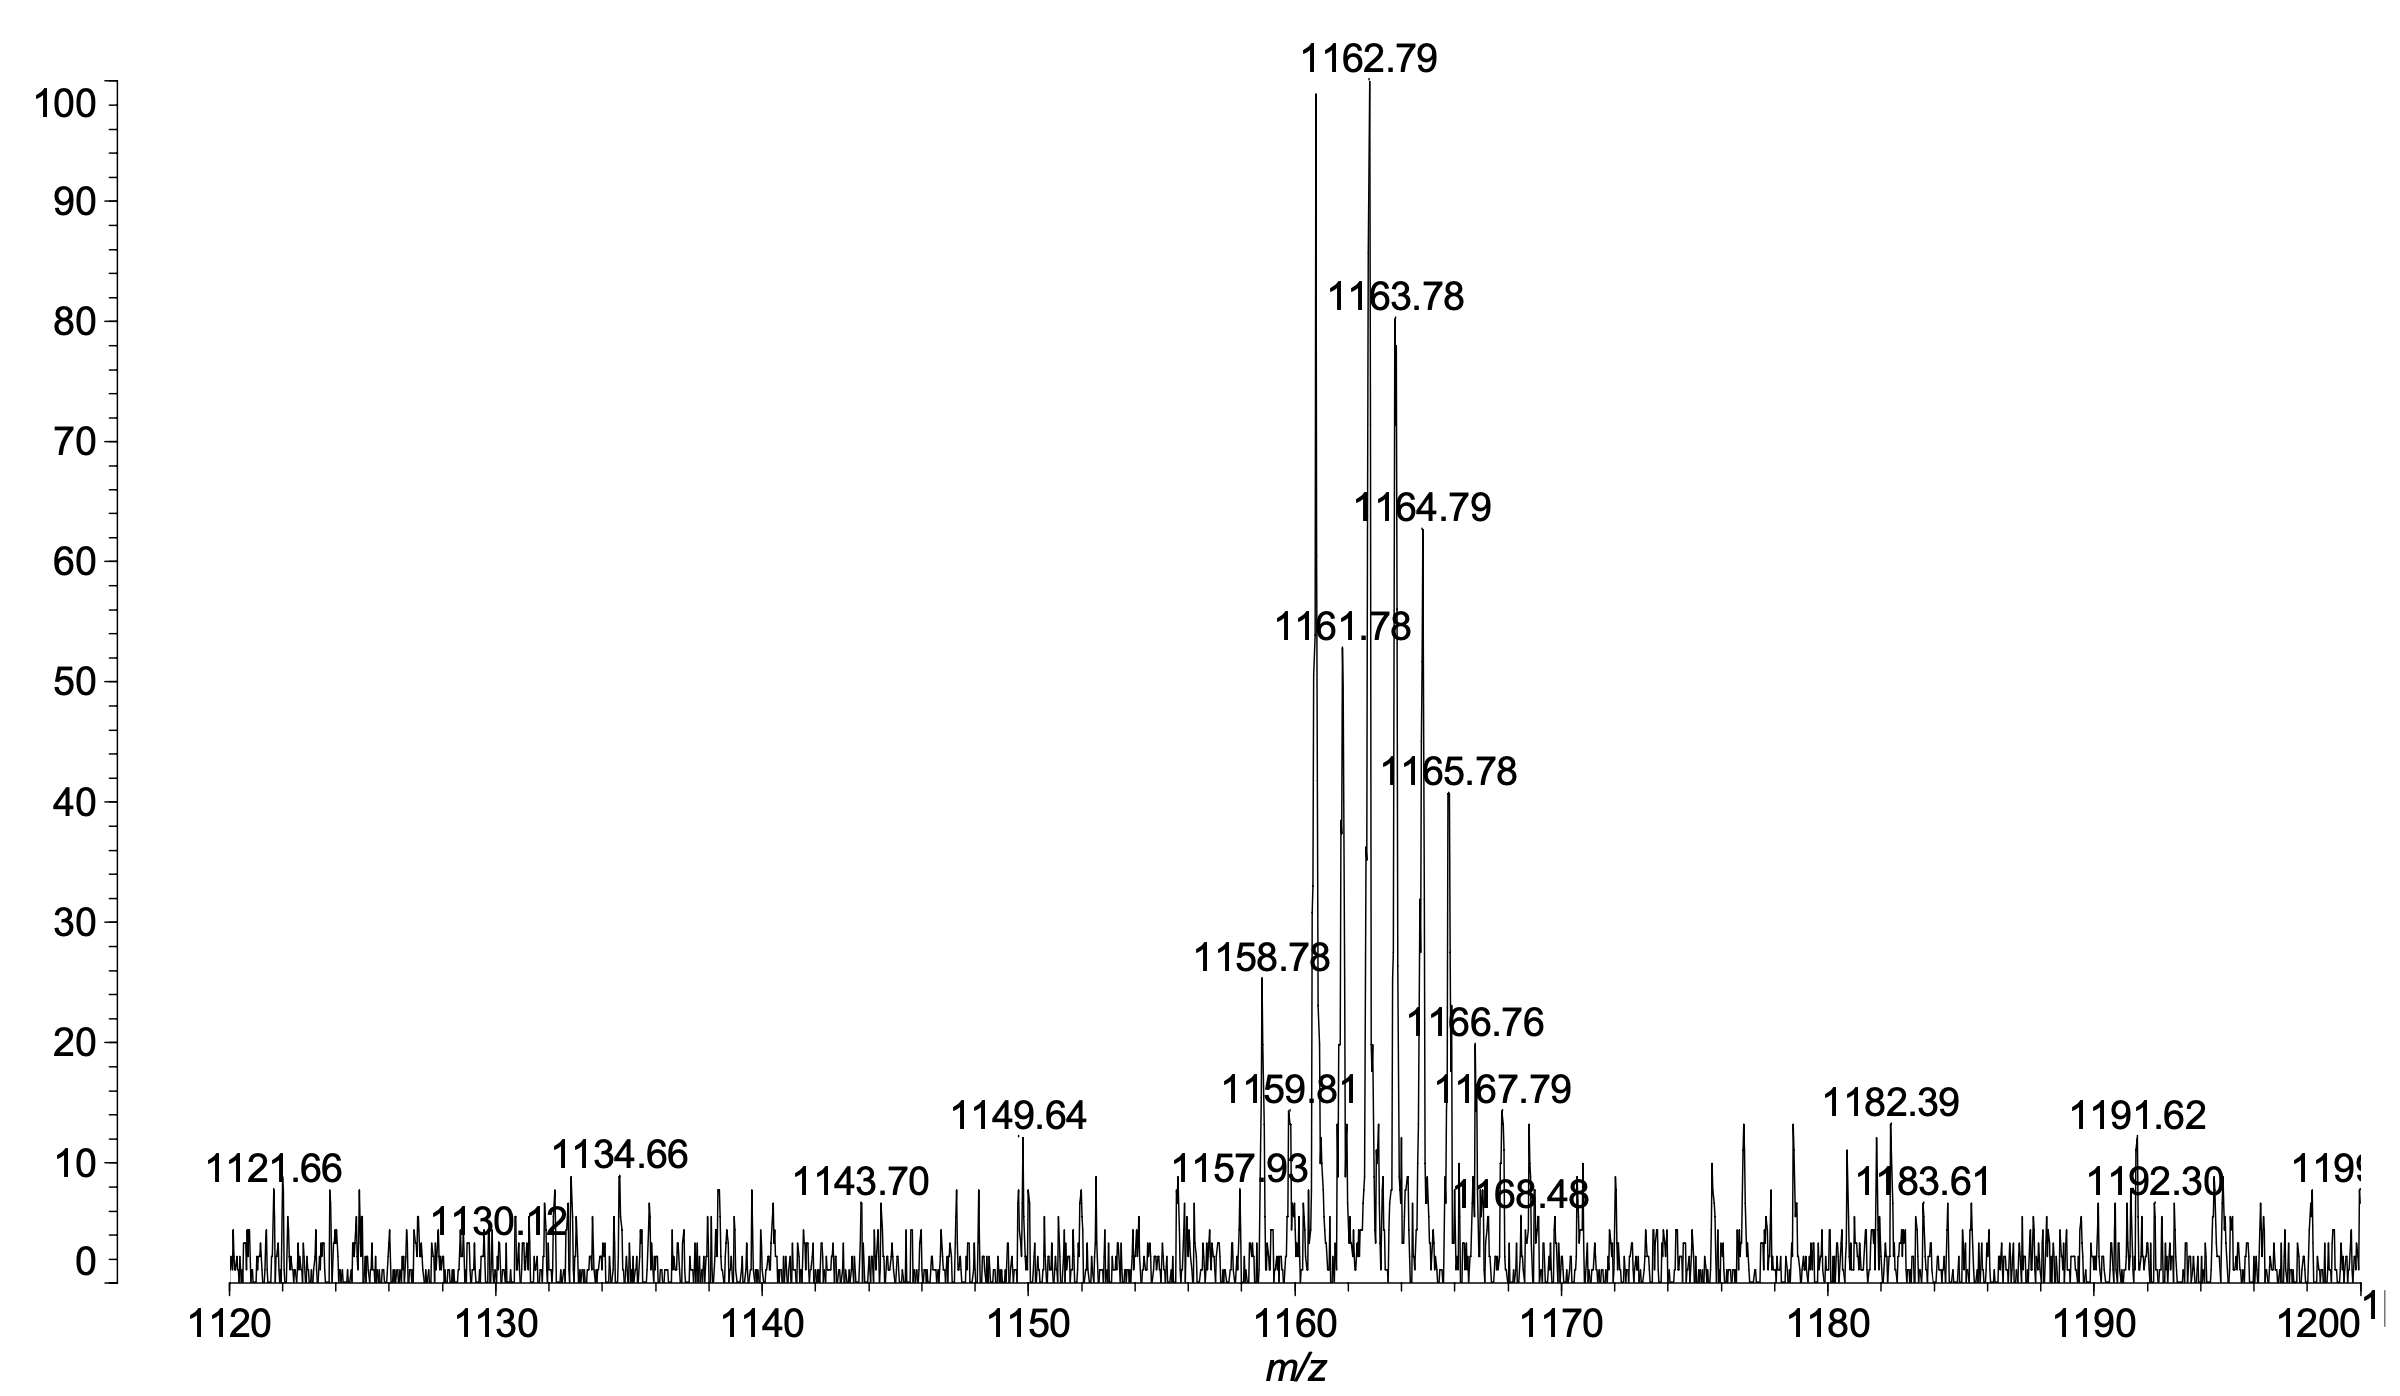
**

**14**

**Figure S39:** MALDI-TOF MS spectrum for **14**.

**
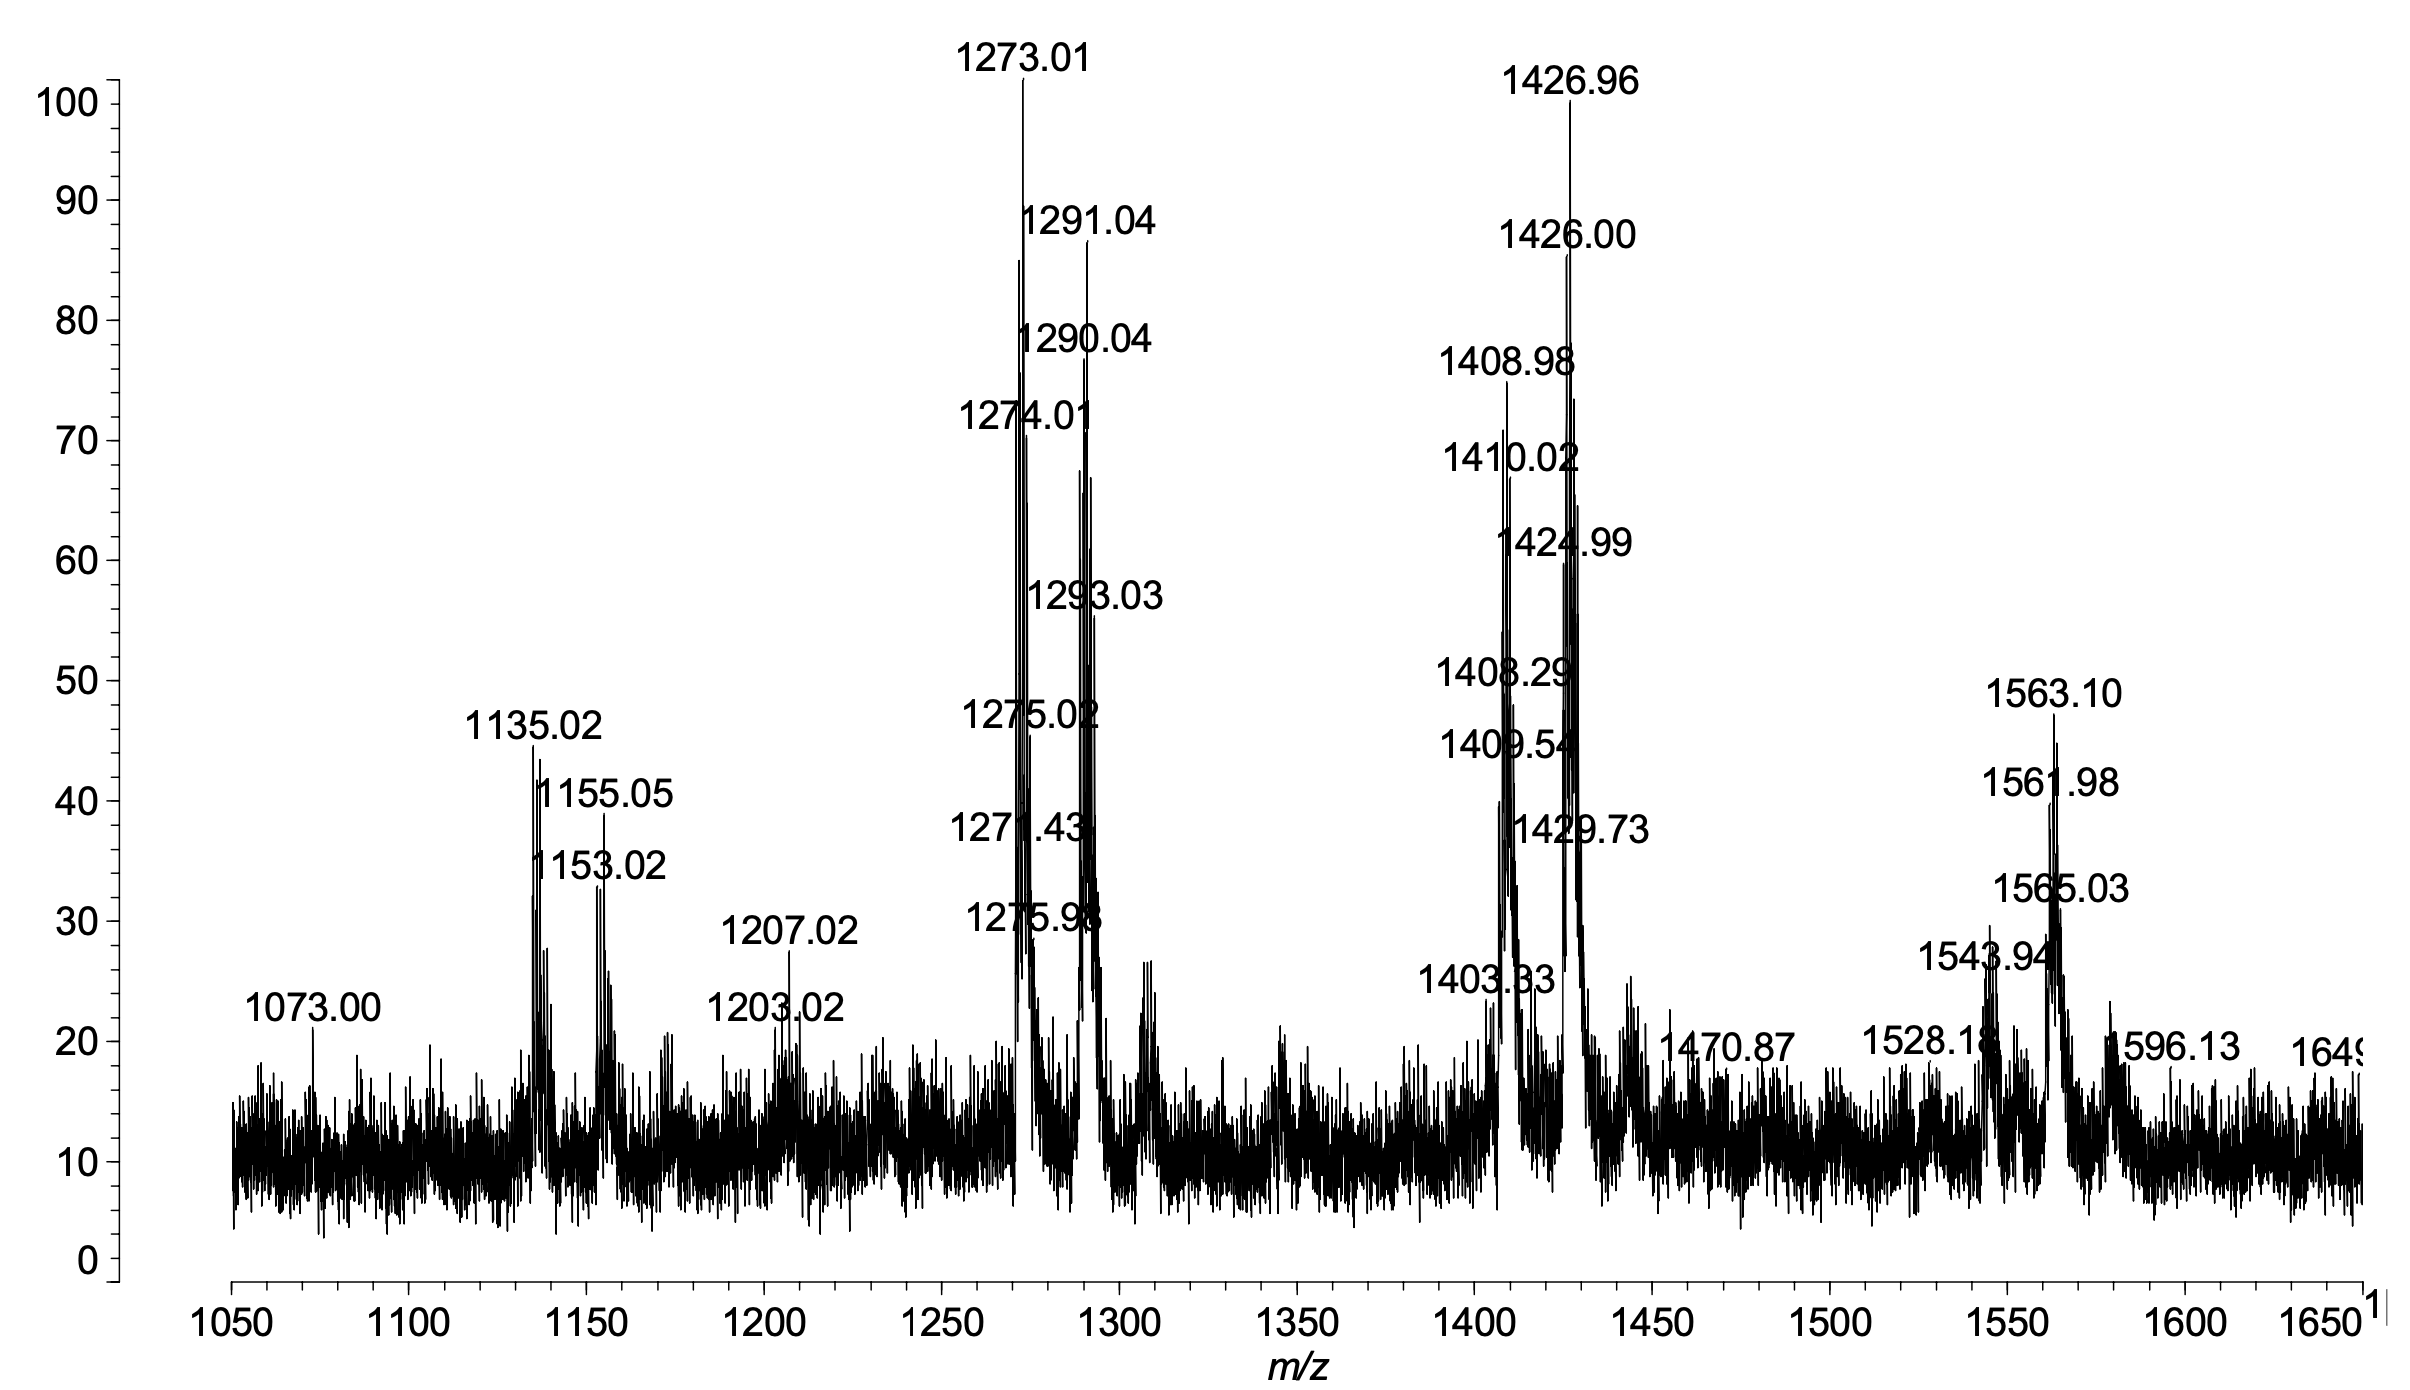
**

[**15a**+Na]+

[**15a**+K]+

[**15d**+Na]+

[**15d**+K]+

[**15c**+Na]+

[**15c**+K]+

[**15b**+K]+

[**15b**+Na]+

**Figure S40:** MALDI-TOF MS spectrum for **15**.

**4. Thermogravimetry/Differential Thermal Analysis (TG/DTA) for compounds 6-14**

**Figure S41:** TG/DTA spectrum for **6** under N2.

**Figure S42:** TG/DTA spectrum for **7** under N2.

**Figure S43:** TG/DTA spectrum for **8** under N2.

**Figure S44:** TG/DTA spectrum for **9** under N2.

**Figure S45:** TG/DTA spectrum for **10** under N2.

**Figure S46:** TG/DTA spectrum for **11** under N2.

**Figure S47:** TG/DTA spectrum for **12** under N2.

**Figure S48:** TG/DTA spectrum for **13** under N2.

**Figure S49:** TG/DTA spectrum for **14** under N2.

**Table S1. Thermal properties for compounds 6-14 under N2**

| **Compounds** | **Td5 (˚C)** | **Residue at 1000 ˚C (%)** |
| --- | --- | --- |
| **6** | 172 | 80 |
| **7** | 196 | 55 |
| **8** | 148 | 24 |
| **9** | 198 | 60 |
| **10** | 340 | 18 |
| **11** | 422 | 20 |
| **12** | 348 | 33 |
| **13** | 333 | 10 |
| **14** | 323 | 17 |
